# Supplementary material for: Inductive effects of 10 and 12-vertex closo-carborane anions: cluster size and charge make a difference
Source: Royal Society of Chemistry journal article supplement (doi:10.1039/c5cc08377j), 2015-12-08
Supplement: c5cc08377j1.pdf [file c5cc08377j1.pdf]

## Supplementary Information

# The Inductive Effects of 10 and 12-Vertex *closo*-Carborane Anion Ligand Substituents: Cluster Size and Charge Make a Difference.

Jess Estrada, Christopher A. Lugo, Scott G. McArthur, and Vincent Lavallo\*

correspondence to: vincent.lavallo@ucr.edu

†Department of Chemistry, University of California Riverside. Riverside, CA 92521 (USA).

vincent.lavallo@ucr.edu

### Table of Contents

|                                                                                             |     |
|---------------------------------------------------------------------------------------------|-----|
| General Considerations.....                                                                 | 2   |
| Compound <b>4</b> [Li <sup>+</sup> ] Synthesis and Spectroscopic Data.....                  | 3   |
| Compound <b>4=O</b> [HNMe <sub>3</sub> <sup>+</sup> ] Synthesis and Spectroscopic Data..... | 7   |
| Complex <b>5</b> [Li <sup>+</sup> ] Synthesis and Spectroscopic Data.....                   | 12  |
| Complex <b>7</b> [Li <sup>+</sup> ] Synthesis and Spectroscopic Data.....                   | 17  |
| Complex <b>8</b> [Li <sup>+</sup> ] Synthesis and Spectroscopic Data.....                   | 21  |
| X-Ray Structure Data for Complex <b>5</b> [Li <sup>+</sup> ].....                           | 26  |
| X-Ray Structure Data for Complex <b>8</b> [Li <sup>+</sup> ] .....                          | 74  |
| References.....                                                                             | 141 |

## General Considerations

Unless otherwise stated, all manipulations were carried out using standard Schlenk or glovebox techniques ( $\text{O}_2$ ,  $\text{H}_2\text{O}$  < 1ppm) under an argon or dinitrogen atmosphere. Compounds **3** and **6** were prepared according to literature.<sup>1,2</sup> Solvents were dried on NaK, K, or  $\text{CaH}_2$  and distilled under argon before use. Reagents were purchased from commercial vendors and used without further purification. NMR spectra were recorded on Bruker Avance 300 MHz, Varian Inova 300 MHz, Varian Inova 400 MHz, or Varian Inova 500 MHz spectrometers.  $^1\text{H}$  NMR and  $^{13}\text{C}$  NMR chemical shifts were referenced to residual solvent.  $^{11}\text{B}$  NMR chemical shifts were externally referenced to  $\text{BF}_3\text{OEt}_2$ .  $^{31}\text{P}$  NMR chemical shifts were externally referenced to 80%  $\text{H}_3\text{PO}_4$  in  $\text{H}_2\text{O}$ . HRMS was recorded on Agilent Technologies 6210 (time of flight LC/MS) using ESI technique. IR spectra were recorded on Bruker Equinox 55 FT-IR spectrometer. Conditions for calculating the cone angle were consistent with literature procedures.<sup>3</sup> The Rh-P bond distance was set to 2.28 Å and the van der Waals radius for hydrogen was set to 1.00 Å. The crystallographic coordinates were used to calculate:  $d$ , the distance between the metal and each of the hydrogen atoms on the first organic substituent on the phosphines, and  $\alpha$ , the corresponding P-Rh-H angle. The half angle,  $\theta$ , was then calculated from following the trigonometric relationship in the equation below:

$$\theta = \alpha + 180/\pi \times \sin^{-1}(r_H/d)$$

where  $r_H$  is the van der Waals radius for hydrogen. After the half angles are calculated for all the hydrogens, the largest half angle is used. This procedure is repeated for the second and third substituents on phosphorus. The crystallographic cone angle  $\Theta$  is then calculated with the equation below:

$$\Theta = 2/3 \sum \theta_i$$

For **4**[Li<sup>+</sup>], the cone angle was calculated for both phosphines and then averaged. For **8**[Li<sup>+</sup>], the cone angle of the phosphine without the B-H “agostic like” interaction was used to give a clear indication of the steric hindrance of the phosphine substituent.

## Compound 4[Li<sup>+</sup>] Synthesis and Spectroscopic Data

Carborane **3** (210 mg, 1.17 mmol) was dissolved in 3 mL of THF in a 20 mL scintillation vial. *n*-BuLi (2.5 mL, 2.5 M in hexanes, 6.25 mmol) was added dropwise and the mixture was allowed to stir for 1.5 hours at room temperature. The resulting solution was added dropwise to a 100 mL schlenk tube containing 50 mL hexanes resulting in an off white precipitate. The hexanes solution was decanted and the solid was further washed with (2 x 10 mL) hexanes. The resulting product was pumped to dryness and then dissolved in 3 mL of THF. A solution of CIP(*i*Pr)<sub>2</sub> (187 μL, 178 mg, 1.17 mmol) in 2 mL of THF was then added dropwise and allowed to stir at room temperature overnight. The slight yellow solution was added to a 100 mL schlenk tube containing 30 mL hexanes resulting in a white precipitate. The solvent was decanted and the precipitate was washed with more hexanes (2 x 10 mL) then dried under vacuum. The product was extracted from LiCl with benzene (3 x 10 mL) and filtered. The solvent was then removed under reduced pressure to afford 370 mg (0.976 mmol, 83 %) of **4[Li<sup>+</sup>]** (Note: Li<sup>+</sup> counteranion contains 2 coordinated THF molecules). <sup>1</sup>H NMR (300 MHz, C<sub>6</sub>D<sub>6</sub>, 25 °C) δ = 3.45 (m, 8H, THF), 2.66 (sep-d, 2H, CH, <sup>3</sup>J(H-H) = 7.0 Hz, <sup>2</sup>J(P-H) = 3.6 Hz), 1.59 (dd, 6H, CH<sub>3</sub>, <sup>3</sup>J(P-H) = 14.0 Hz, <sup>3</sup>J(H-H) = 7.0 Hz), 1.47 (dd, 6H, CH<sub>3</sub>, <sup>3</sup>J(P-H) = 11.9 Hz, <sup>3</sup>J(H-H) = 7.0 Hz), 1.33 (m, 8H, THF) ppm. <sup>13</sup>C{<sup>1</sup>H} NMR (75 MHz, C<sub>6</sub>D<sub>6</sub>, 25 °C) δ = 26.8 (d, CH, <sup>1</sup>J(P-C) = 13.1 Hz), 21.3 (d, CH<sub>3</sub>, <sup>2</sup>J(P-C) = 16.6 Hz), 19.8 ppm (d, CH<sub>3</sub>, <sup>2</sup>J(P-C) = 10.5 Hz). <sup>31</sup>P{<sup>1</sup>H} NMR (121 MHz, C<sub>6</sub>D<sub>6</sub>, 25 °C) δ = 22.0 ppm. <sup>11</sup>B{<sup>1</sup>H} NMR (96 MHz, C<sub>6</sub>D<sub>6</sub>, 25 °C) δ = 32.6, -16.4, -23.4 ppm. <sup>11</sup>B NMR (96 MHz, C<sub>6</sub>D<sub>6</sub>, 25 °C) δ = 32.6 (d, <sup>1</sup>J(B-H) = 153.3 Hz), -16.4 (d, <sup>1</sup>J(B-H) = 149.7 Hz), -23.4 (d, <sup>1</sup>J(B-H) = 136.7 Hz) ppm. HRMS (ESI): Calculated for C<sub>7</sub>H<sub>23</sub>B<sub>9</sub>P<sub>1</sub> [M]<sup>+</sup>: 236.2411; Found: 236.2415. Melting point: 105-107°C. Anal. Calcd for C<sub>11</sub>H<sub>31</sub>B<sub>9</sub>O<sub>1</sub>Li<sub>1</sub>: C, 42.95; H, 10.16. Found: C, 43.10; H, 9.84. (Note: Li<sup>+</sup> counteranion contains 1 coordinated THF molecule and this is taken into account in the molecular formula and is corroborated by <sup>1</sup>H NMR analysis.)

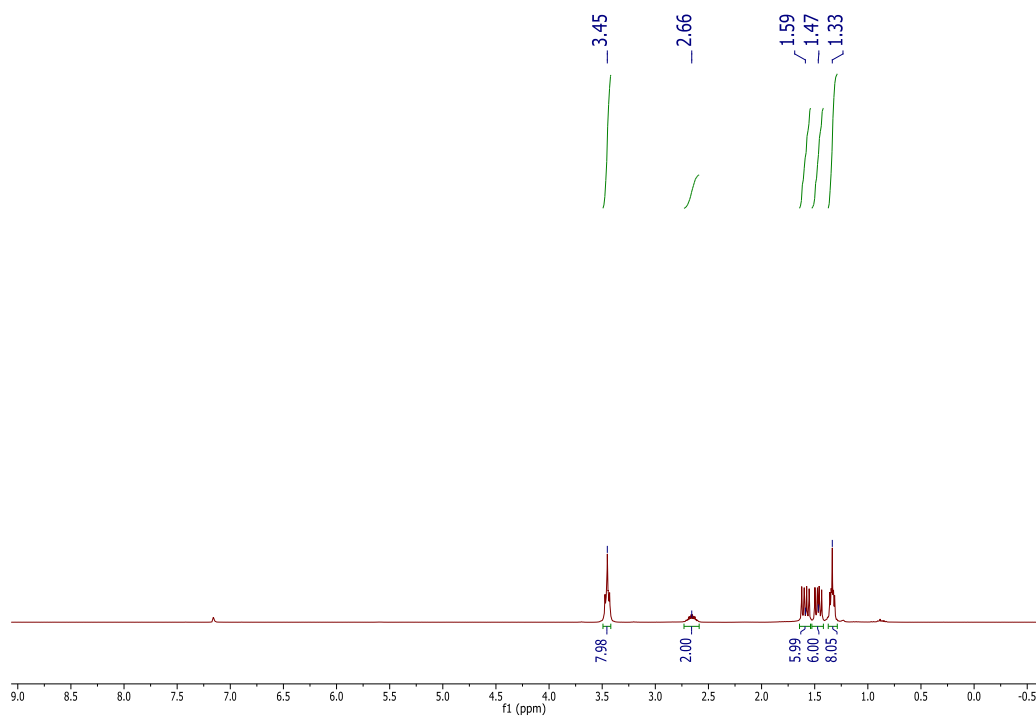

**Figure S1.**  $^1\text{H}$  NMR (300 MHz,  $\text{C}_6\text{D}_6$ , 25  $^\circ\text{C}$ ) of compound **4** $[\text{Li}^+]$ . Note that THF is bound to  $\text{Li}^+$  counteranion.

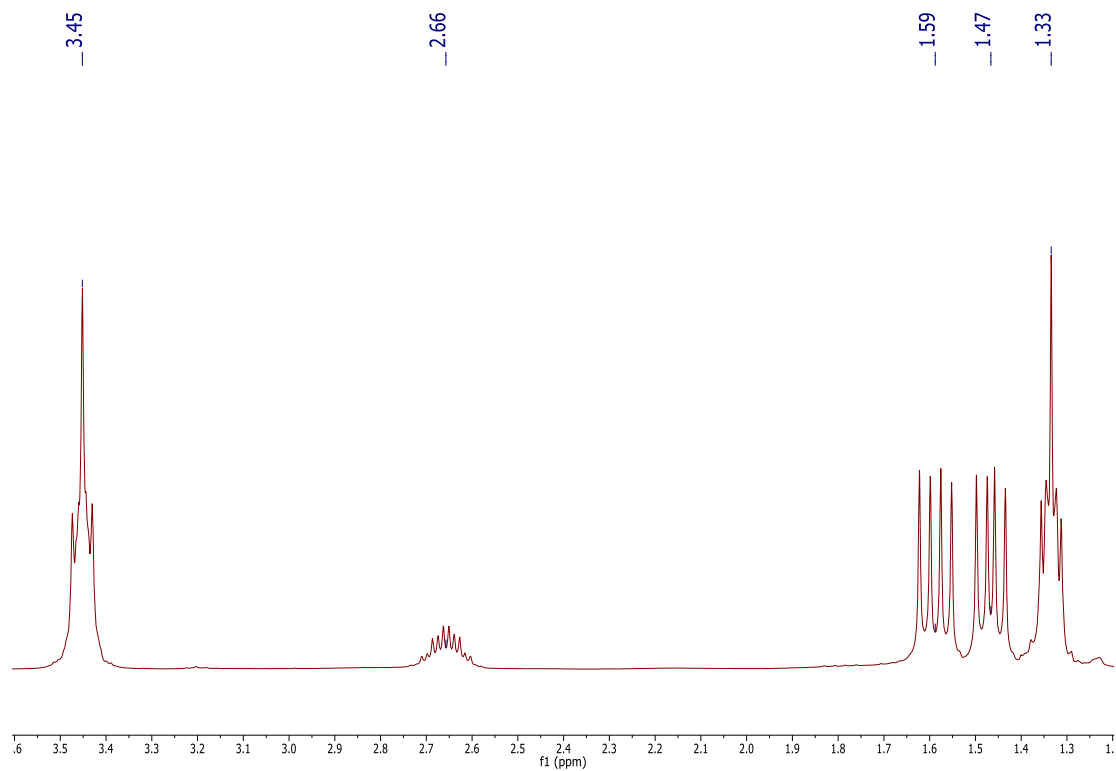

**Figure S2.**  $^1\text{H}$  NMR (300 MHz,  $\text{C}_6\text{D}_6$ , 25  $^\circ\text{C}$ ) of compound **4** $[\text{Li}^+]$  (zoomed in).

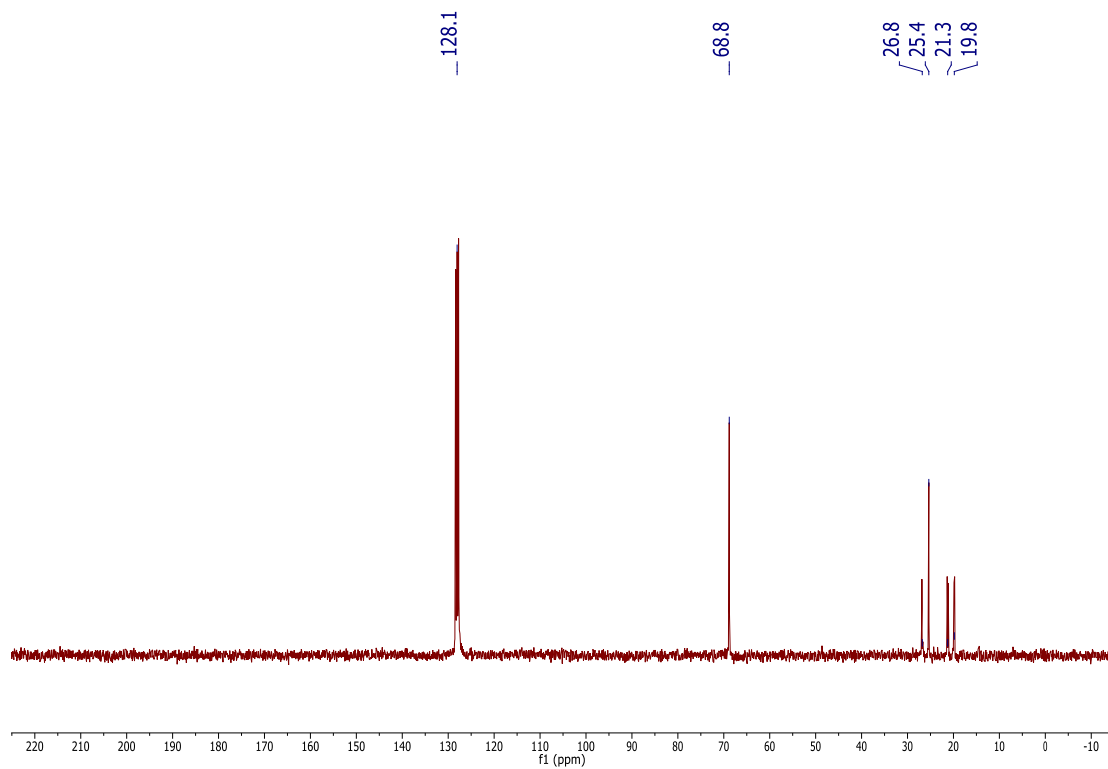

**Figure S3.**  $^{13}\text{C}\{^1\text{H}\}$  NMR (75 MHz,  $\text{C}_6\text{D}_6$ , 25 °C) of compound **4**[Li<sup>+</sup>].

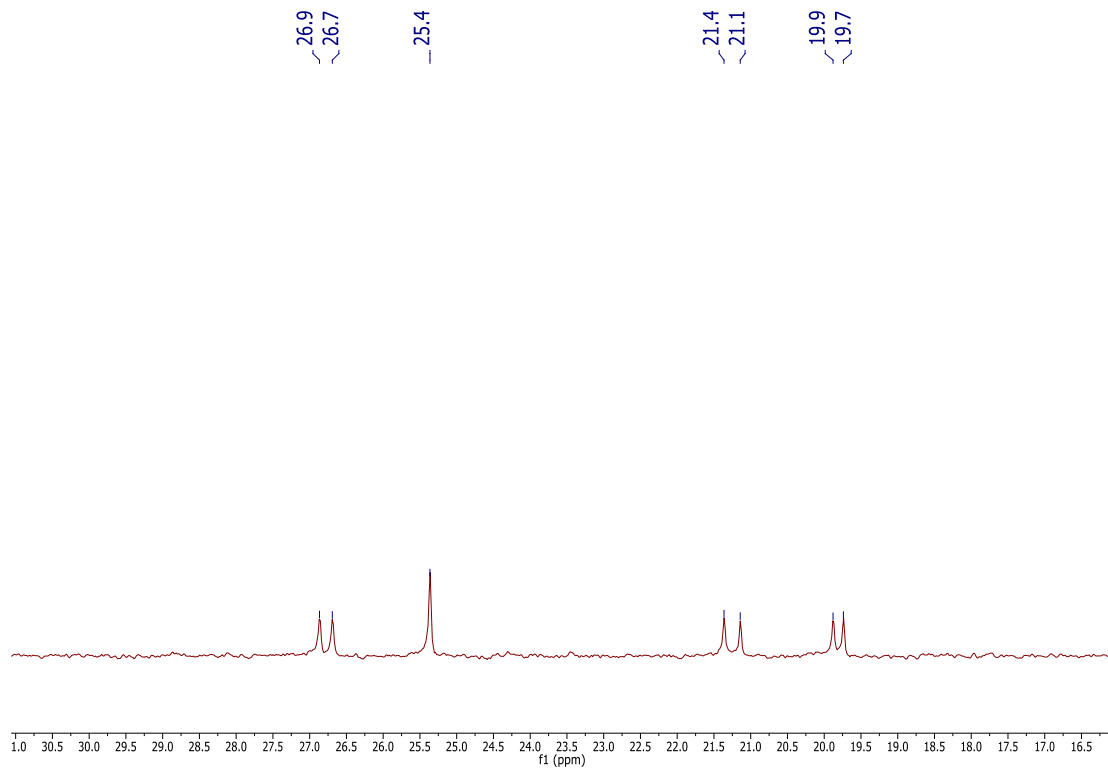

**Figure S4.**  $^{13}\text{C}\{^1\text{H}\}$  NMR (75 MHz,  $\text{C}_6\text{D}_6$ , 25 °C) of compound **4**[Li<sup>+</sup>] (zoomed in).

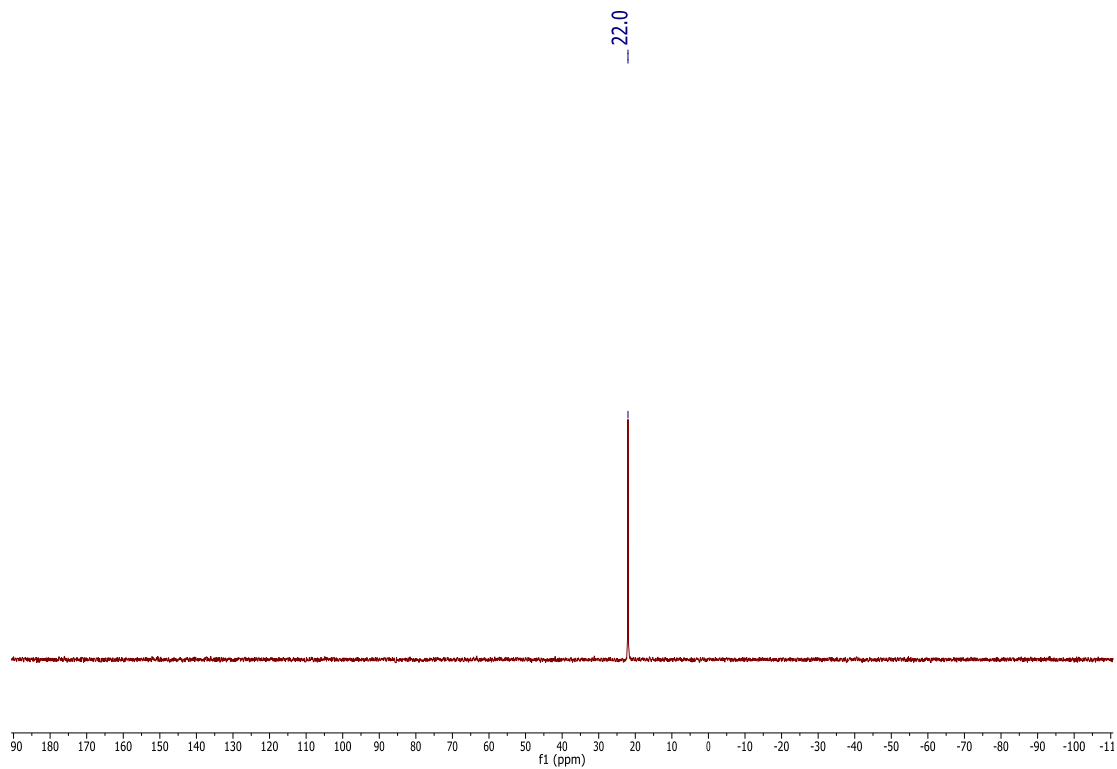

**Figure S5.**  $^{31}\text{P}\{^1\text{H}\}$  NMR (121 MHz,  $\text{C}_6\text{D}_6$ , 25 °C) of compound  $4[\text{Li}^+]$ .

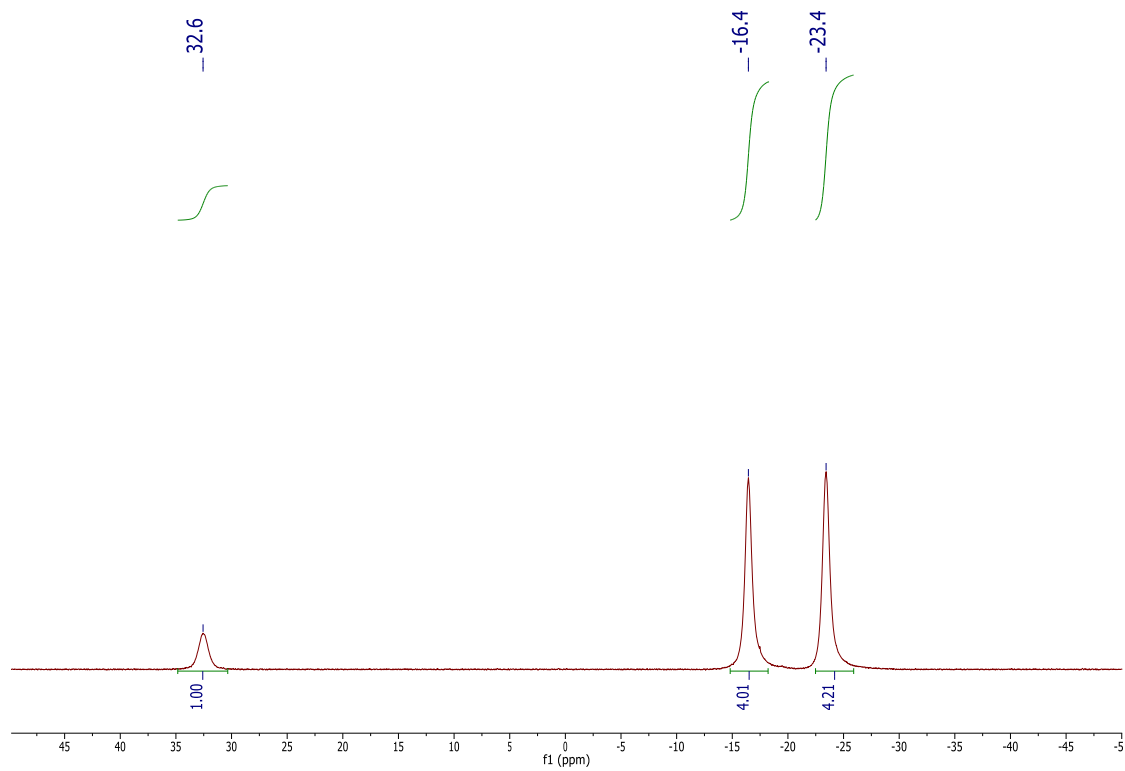

**Figure S6.**  $^{11}\text{B}\{^1\text{H}\}$  NMR (96 MHz,  $\text{C}_6\text{D}_6$ , 25 °C) of compound  $4[\text{Li}^+]$ .

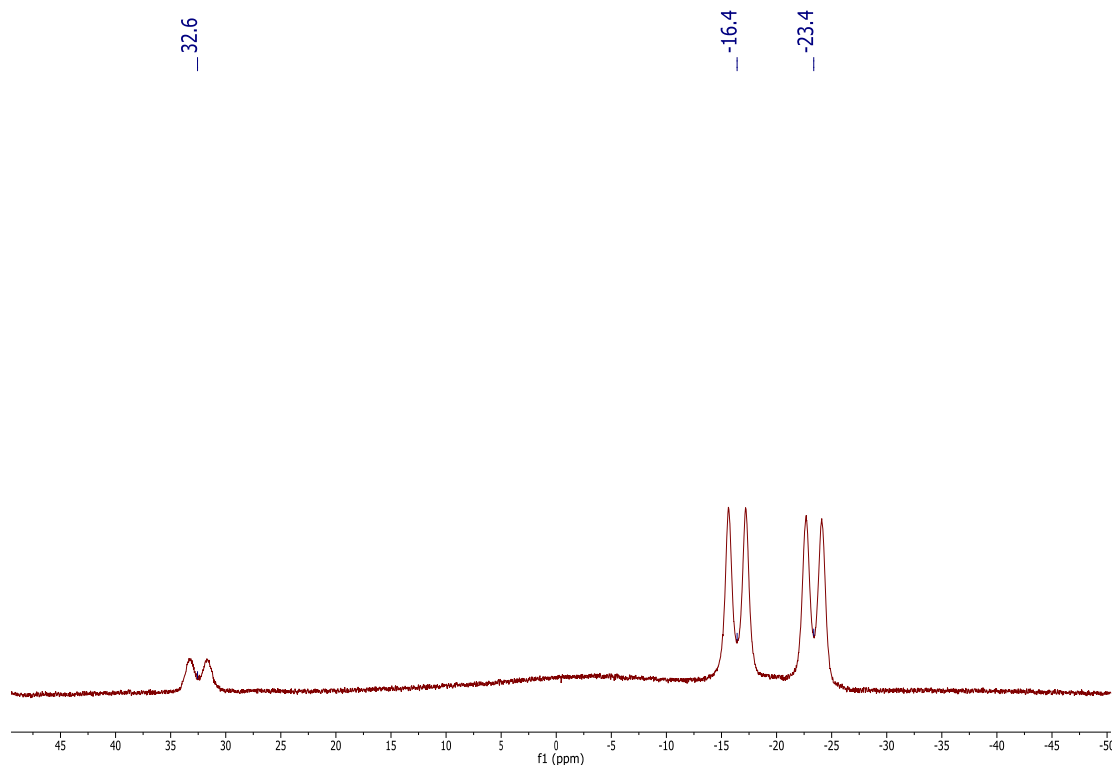

**Figure S7.**  $^{11}\text{B}$  NMR (96 MHz,  $\text{C}_6\text{D}_6$ , 25 °C) of compound  $4[\text{Li}^+]$ .

#### Oxidation of $4[\text{Li}^+]$ to $4=\text{O}[\text{HNMe}_3^+]$

Compound  $4[\text{Li}^+]$  (250 mg, 0.53 mmol) was dissolved in 10 mL THF in a 20 mL scintillation vial and vigorously stirred in air for 2 hours. (**Note:** The reaction was monitored via  $^{31}\text{P}$  NMR to ensure complete oxidation had occurred prior to work up.) Residual THF was removed via reduced pressure and the resulting solid was dissolved in 10 mL  $\text{H}_2\text{O}$  and excess  $\text{HNMe}_3\text{Cl}$  was added to the aqueous solution. The resulting precipitate was filtered and washed with (3 x 10 mL)  $\text{H}_2\text{O}$ . The resulting white powder was dried under reduced pressure to afford compound  $4=\text{O}[\text{HNMe}_3^+]$  in 95% yield (125.8 mg, 0.50 mmol).  $^1\text{H}$  NMR (500 MHz,  $(\text{CD}_3)_2\text{CO}$ , 25 °C)  $\delta$  = 11.81 (bs, 1H, *NH*), 5.97 (bs, 1H, *BH*), 2.91 (s, 1H, *NCH}\_3*), 2.63 (m, 2H, *CH*), 1.70 (bs, 4H, *BH*), 1.45 (dd, 6H, *CH}\_3*,  $^3J(\text{P-H}) = 8.3$  Hz,  $^3J(\text{H-H}) = 7.5$  Hz), 1.42 (dd, 6H, *CH}\_3*,  $^3J(\text{P-H}) = 8.1$  Hz,  $^3J(\text{H-H}) = 7.5$  Hz), 0.76 (bs, 4H, *BH*) ppm.  $^{13}\text{C}\{^1\text{H}\}$  NMR (126 MHz,  $(\text{CD}_3)_2\text{CO}$ , 25 °C)  $\delta$  = 57.6 (d, *C}\_{carborane}*,  $^1J(\text{P-C}) = 94.3$  Hz), 45.4 (*NCH}\_3*), 28.9 (d, *CH*,  $^1J(\text{P-C}) = 71.3$  Hz), 16.4 (d, *CH}\_3*,  $^1J(\text{P-C}) = 20.5$  Hz), 16.4 (d, *CH}\_3*,  $^1J(\text{P-C}) = 20.0$  Hz) ppm.  $^{31}\text{P}\{^1\text{H}\}$  NMR (121 MHz,  $\text{CD}_2\text{Cl}_2$ , 25 °C)  $\delta$  = 56.6 ppm.  $^{11}\text{B}\{^1\text{H}\}$  NMR (96 MHz,  $\text{CD}_2\text{Cl}_2$ , 25 °C)  $\delta$  = 43.5, -11.5, -18.6 ppm.  $^{11}\text{B}$  NMR (96 MHz,  $\text{CD}_2\text{Cl}_2$ , 25 °C)  $\delta$  = 43.5 (d,  $^1J(\text{B-H}) = 150.6$  Hz), -11.8 (d,  $^1J(\text{B-H}) = 152.6$  Hz), -18.6 (d,  $^1J(\text{B-H}) = 140.3$  Hz) ppm. HRMS (ESI): Calculated for  $\text{C}_7\text{H}_{23}\text{B}_9\text{P}_1\text{O}_1$  [*M*] $^+$ : 252.2360; Found: 252.2354.

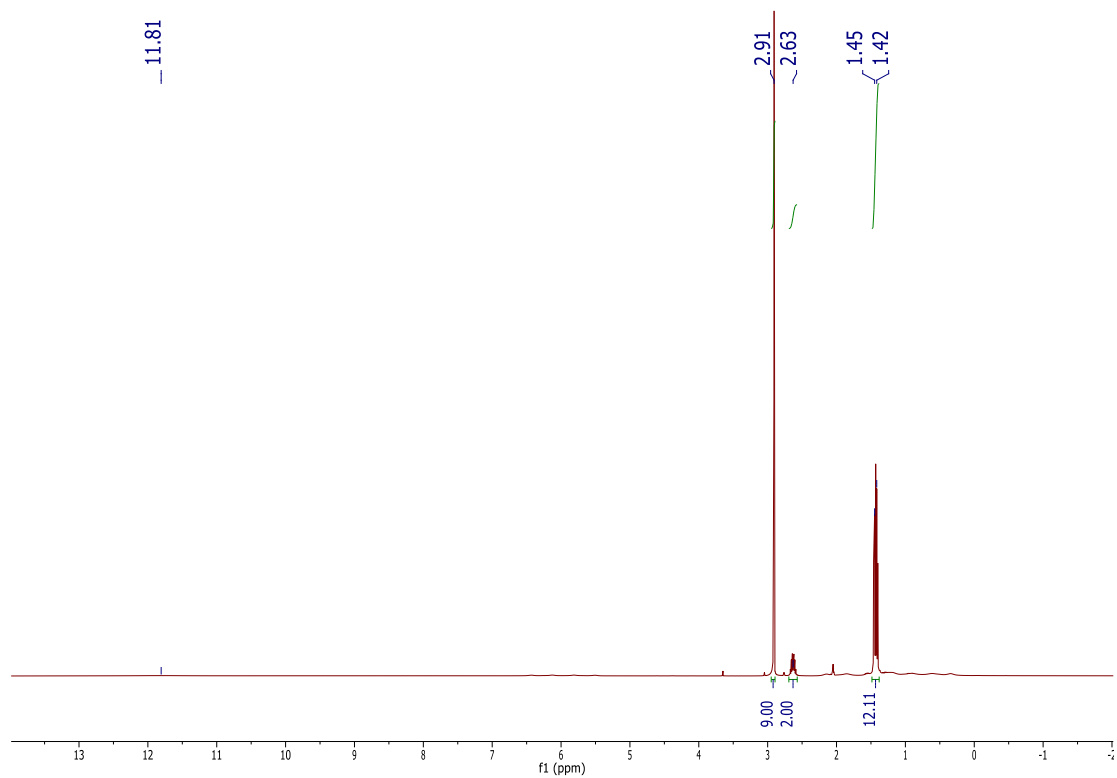

**Figure S8.**  $^1\text{H}$  NMR (500 MHz, Acetone- $\text{d}_6$ , 25  $^\circ\text{C}$ ) of compound  $4=\text{O}[\text{HNMe}_3^+]$ .

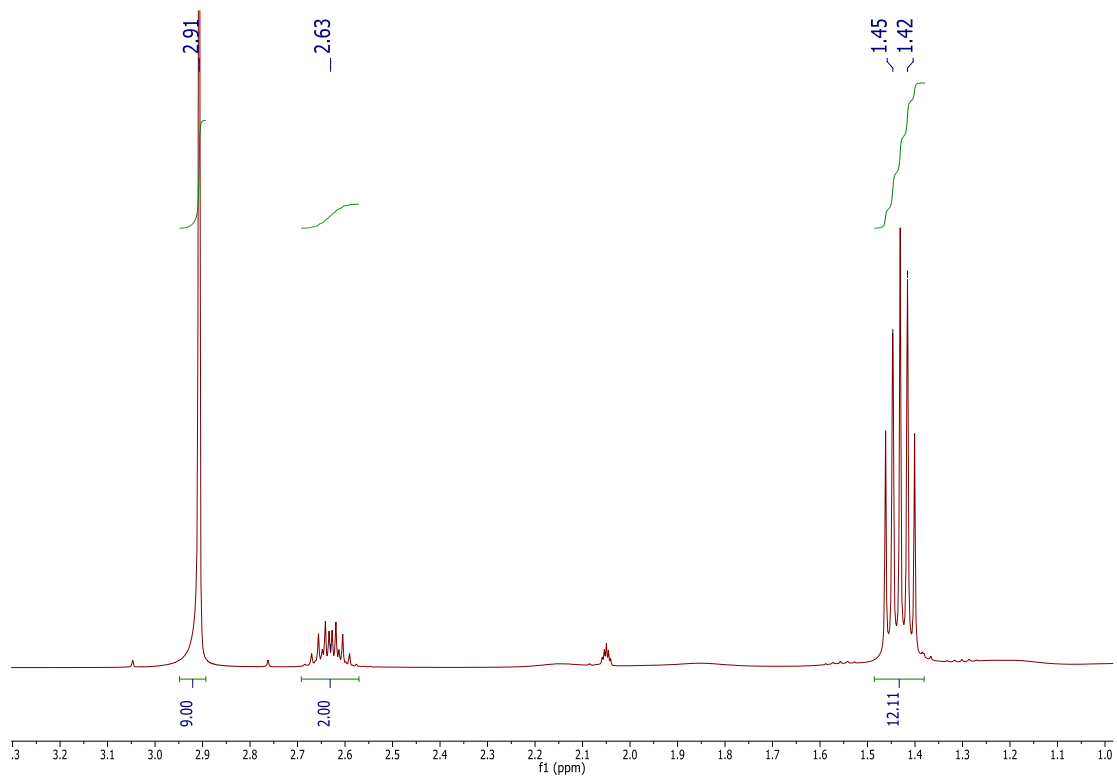

**Figure S9.**  $^1\text{H}$  NMR (500 MHz, Acetone- $\text{d}_6$ , 25  $^\circ\text{C}$ ) of compound  $4=\text{O}[\text{HNMe}_3^+]$  (zoomed in).



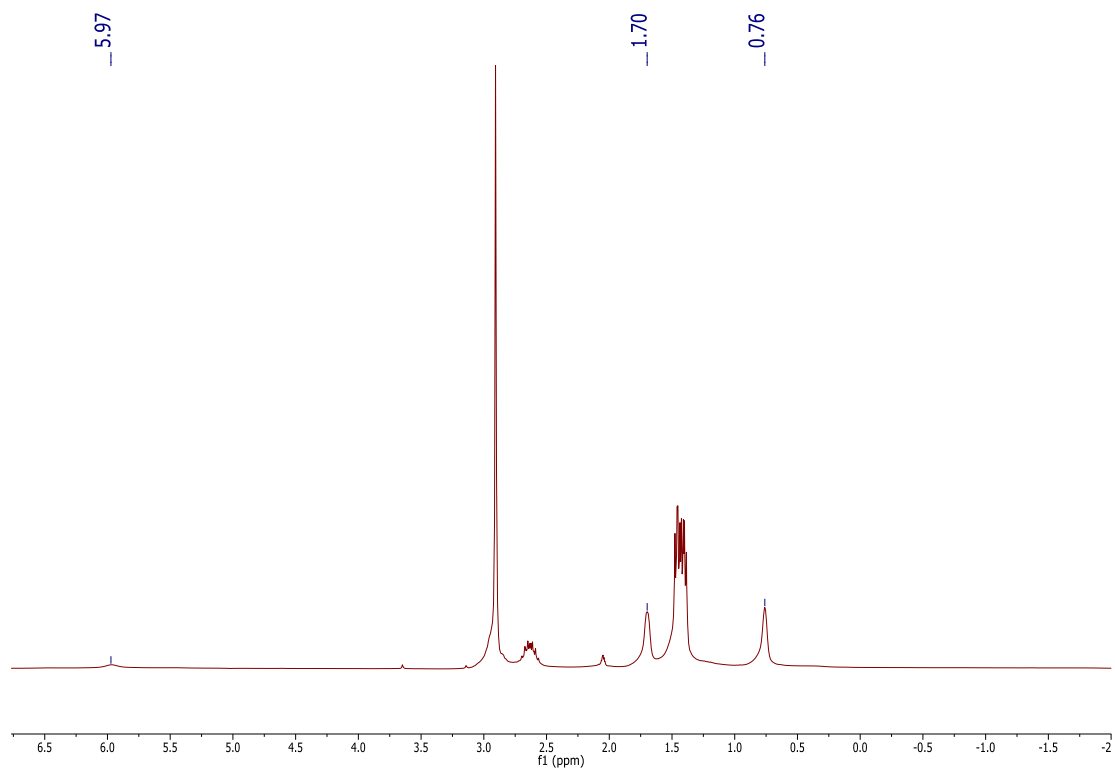

**Figure S10.**  $^1\text{H}\{^{11}\text{B}\}$  NMR (500 MHz, Acetone- $d_6$ , 25 °C) of compound  $4=\text{O}[\text{HNMe}_3^+]$ .

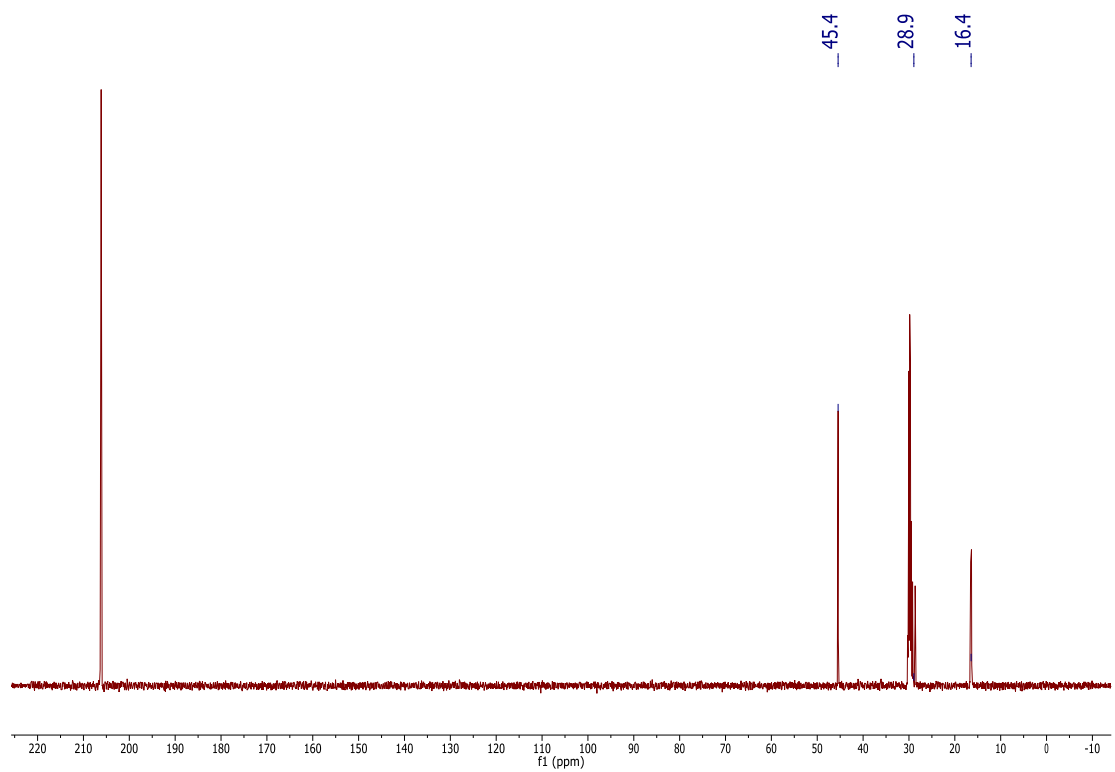

**Figure S11.**  $^{13}\text{C}\{^1\text{H}\}$  NMR (126 MHz, Acetone- $d_6$ , 25 °C) of compound  $4=\text{O}[\text{HNMe}_3^+]$ .

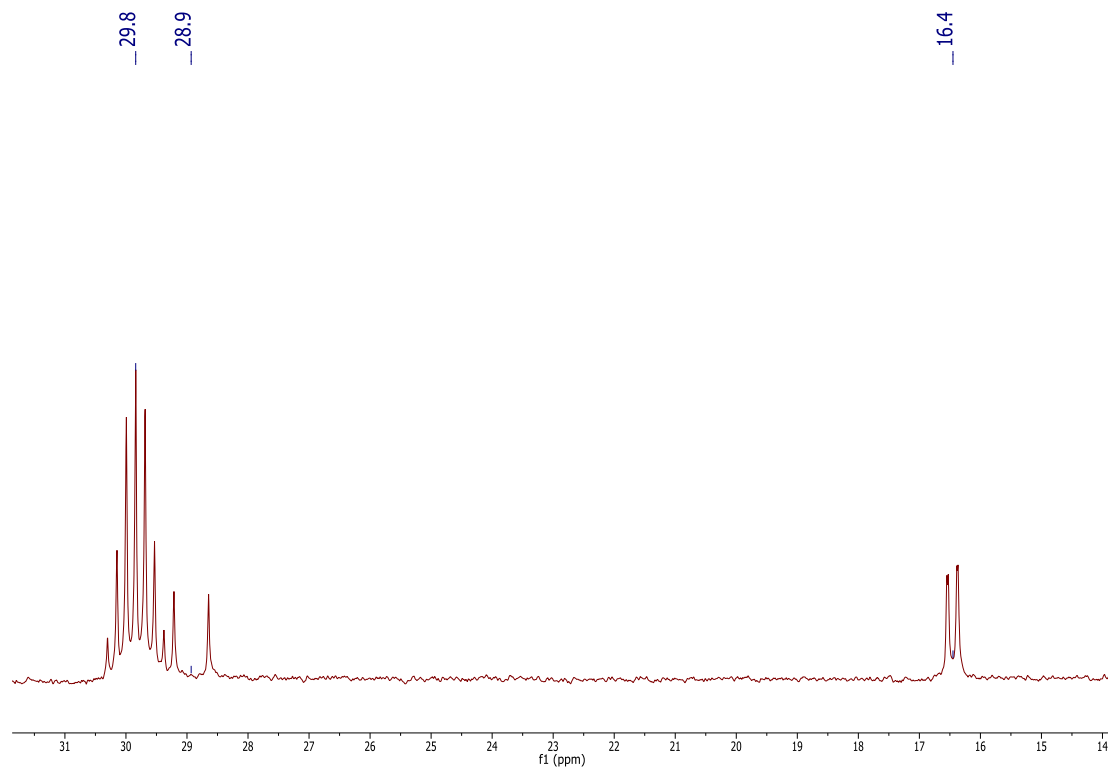

**Figure S12.**  $^{13}\text{C}\{^1\text{H}\}$  NMR (500 MHz, Acetone- $d_6$ , 25 °C) of compound  $4=\text{O}[\text{HNMe}_3^+]$  (zoomed in).

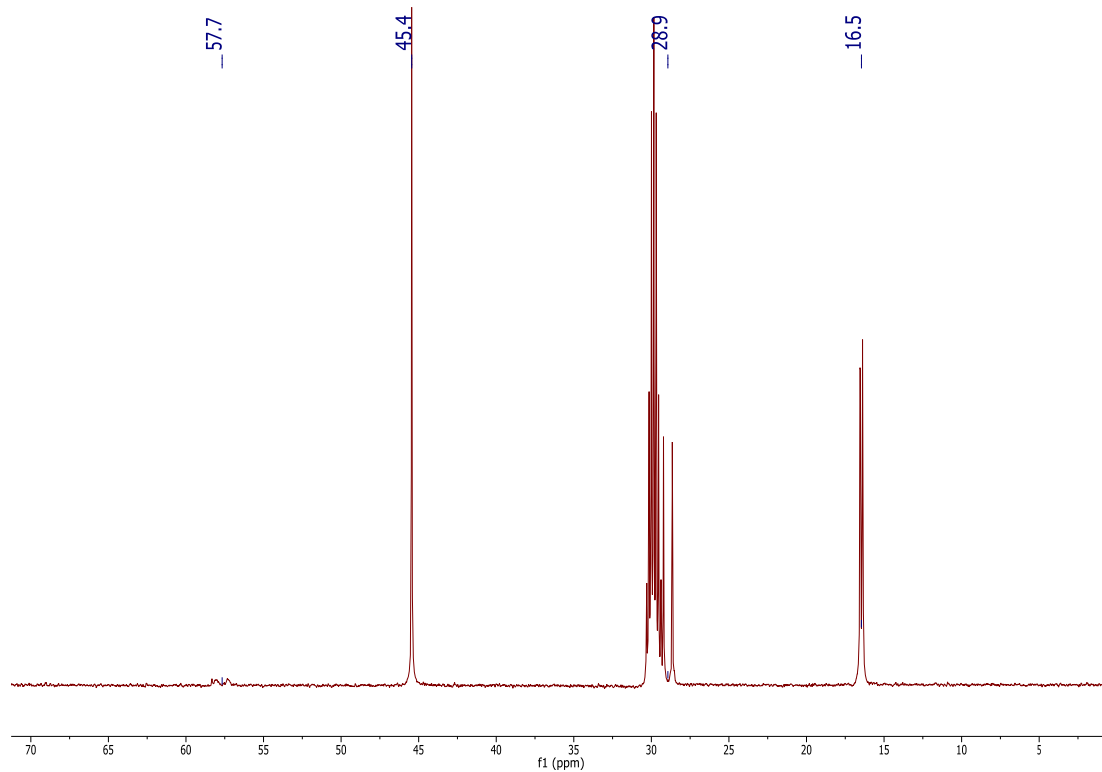

**Figure S13.**  $^{13}\text{C}\{^1\text{H}\}$  NMR (500 MHz, Acetone- $\text{d}_6$ , 25 °C) of compound  $4=\text{O}[\text{HNMe}_3^+]$  (zoomed in).

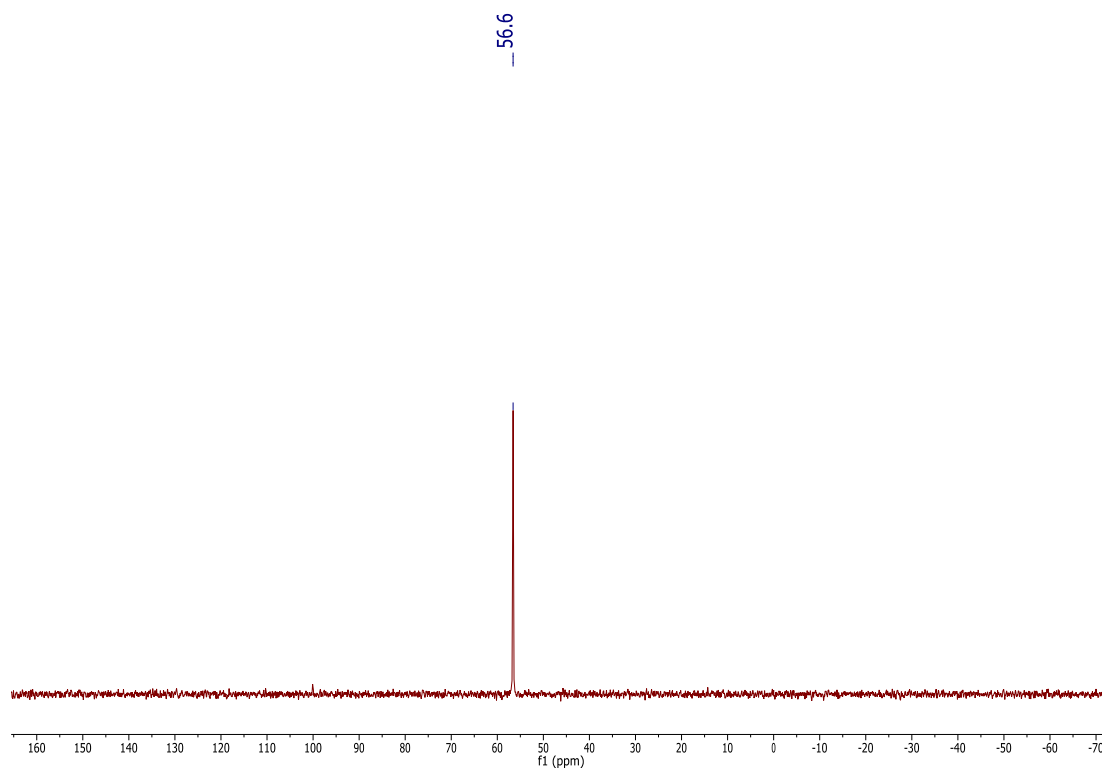

**Figure S14.**  $^{31}\text{P}\{^1\text{H}\}$  NMR (121 MHz, Acetone- $\text{d}_6$ , 25 °C) of compound  $4=\text{O}[\text{HNMe}_3^+]$ .

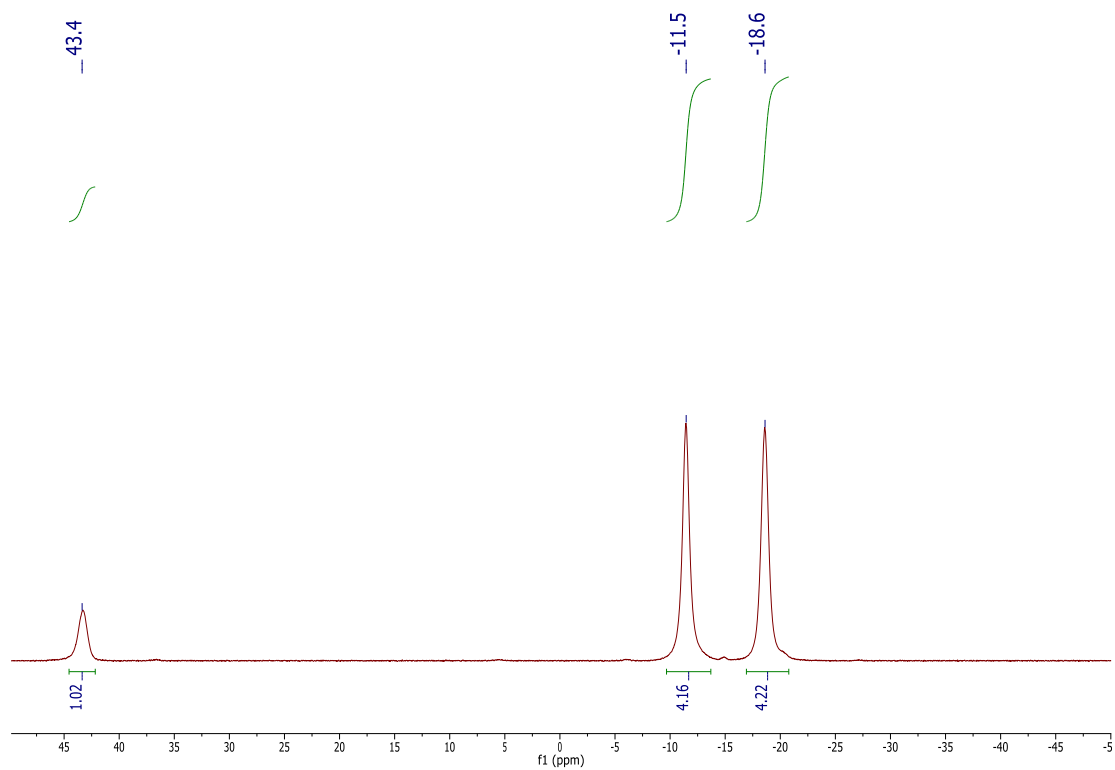

**Figure S15.**  $^{11}\text{B}\{^1\text{H}\}$  NMR (96 MHz, Acetone- $d_6$ , 25 °C) of compound  $4=\text{O}[\text{HNMe}_3^+]$ .

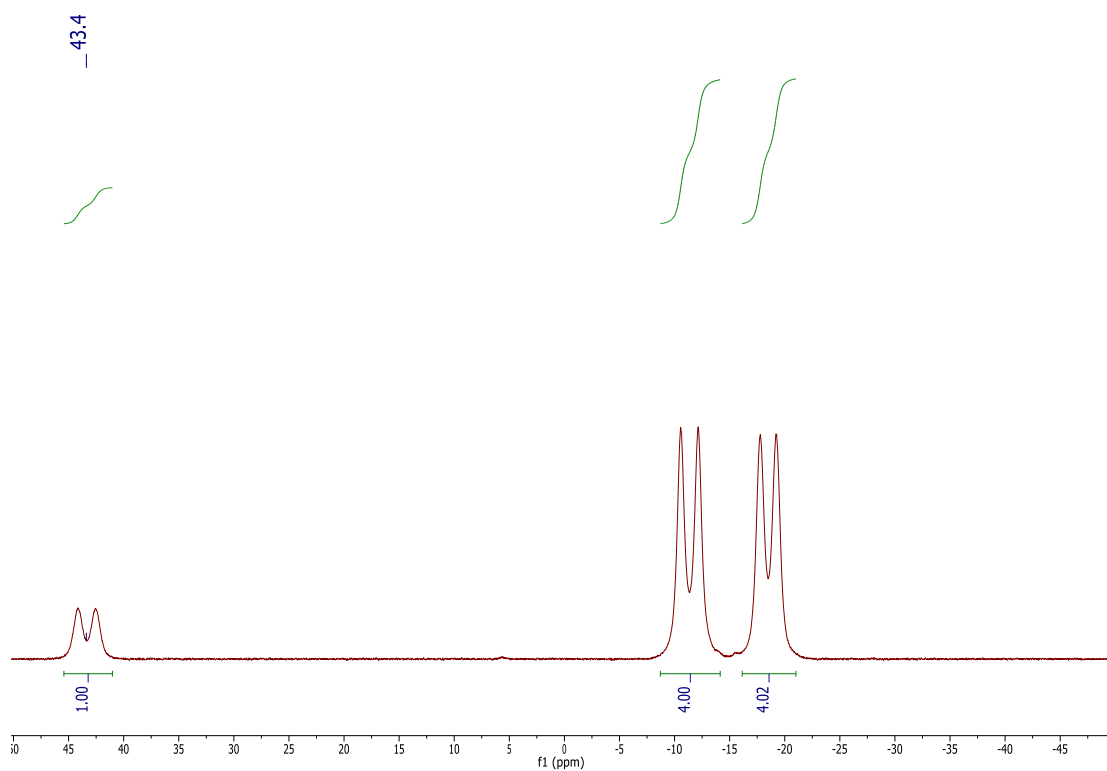

**Figure S16.**  $^{11}\text{B}$  NMR (96 MHz, Acetone- $d_6$ , 25 °C) of compound  $4=\text{O}[\text{HNMe}_3^+]$ .

## Compound 5[Li<sup>+</sup>] Synthesis and Spectroscopic Data

[Rh(CO)<sub>2</sub>Cl]<sub>2</sub> (20 mg, 0.05 mmol) was dissolved in 3 mL CH<sub>2</sub>Cl<sub>2</sub> and a 3 mL CH<sub>2</sub>Cl<sub>2</sub> solution of AgBF<sub>4</sub> (20 mg, 0.10 mmol) was added and stirred for 15 minutes. The resulting red solution was filtered to remove AgCl. The resulting solution was added dropwise to a 5 mL solution of carboranyl phosphine **4**[Li<sup>+</sup>] (94.41 mg, 0.20 mmol) in CH<sub>2</sub>Cl<sub>2</sub>. The reaction was stirred for 30 min and then filtered to remove LiCl. The resulting solution was pumped to dryness and compound **5**[Li<sup>+</sup>] was extracted with 10 mL diethyl ether. Bright yellow crystals were obtained upon cooling this solution to -30 °C, which were filtered and pumped to dryness to afford compound **5**[Li<sup>+</sup>] in 74 % yield (73.6 mg, 0.07 mmol) (**Note:** Li<sup>+</sup> counteraction contains 4 coordinated THF molecules). <sup>1</sup>H NMR (300 MHz, CD<sub>2</sub>Cl<sub>2</sub>, 25 °C) δ = 5.73 (bs, 1H, BH), 3.78 (m, 8H, THF), 3.01 (bm, 2H, CH), 1.93 (m, 8H, THF), 1.84 (bs, 4H, BH), 1.56 (m, 12H, CH<sub>3</sub>), 0.70 (bs, 4H, BH) ppm. <sup>13</sup>C{<sup>1</sup>H} NMR (75 MHz, CD<sub>2</sub>Cl<sub>2</sub>, 25 °C) δ = 188.9 (m, CO), 31.4 (d, CH, <sup>1</sup>J(P-C) = 13.0 Hz), 31.3 (d, CH, <sup>1</sup>J(P-C) = 13.0 Hz), 20.0 (CH<sub>3</sub>), 19.5 (CH<sub>3</sub>) ppm. <sup>31</sup>P{<sup>1</sup>H} NMR (162 MHz, CD<sub>2</sub>Cl<sub>2</sub>, 25 °C) δ = 56.1 (d, <sup>1</sup>J(P-Rh) = 102.7 Hz) ppm. <sup>11</sup>B{<sup>1</sup>H} NMR (96 MHz, CD<sub>2</sub>Cl<sub>2</sub>, 25 °C) δ = 35.9, -15.7, -23.5 ppm. <sup>11</sup>B NMR (96 MHz, CD<sub>2</sub>Cl<sub>2</sub>, 25 °C) δ = 35.9 (d, <sup>1</sup>J(B-H) = 109.0 Hz), -15.7 (d, <sup>1</sup>J(B-H) = 143.8 Hz), -23.5 (d, <sup>1</sup>J(B-H) = 143.8 Hz) ppm. HRMS (ESI): Calculated for C<sub>15</sub>H<sub>44</sub>B<sub>18</sub>P<sub>2</sub>O<sub>1</sub>Rh<sub>1</sub> (one CO extruded) [M]<sup>+</sup>: 602.3863; Found: 602.3879. IR (CH<sub>2</sub>Cl<sub>2</sub>): 2553 cm<sup>-1</sup> (B-H stretch), 1997 cm<sup>-1</sup> (CO stretch). Anal. Calcd for Rh<sub>1</sub>P<sub>2</sub>C<sub>20</sub>H<sub>54</sub>B<sub>18</sub>O<sub>3</sub>Li<sub>1</sub>: C, 29.61; H, 7.77. Found: C, 29.71; H, 7.88. (**Note:** Li<sup>+</sup> counteraction contains 1 coordinated THF molecule and this is taken into account in molecular formula and is corroborated by <sup>1</sup>H NMR analysis.)

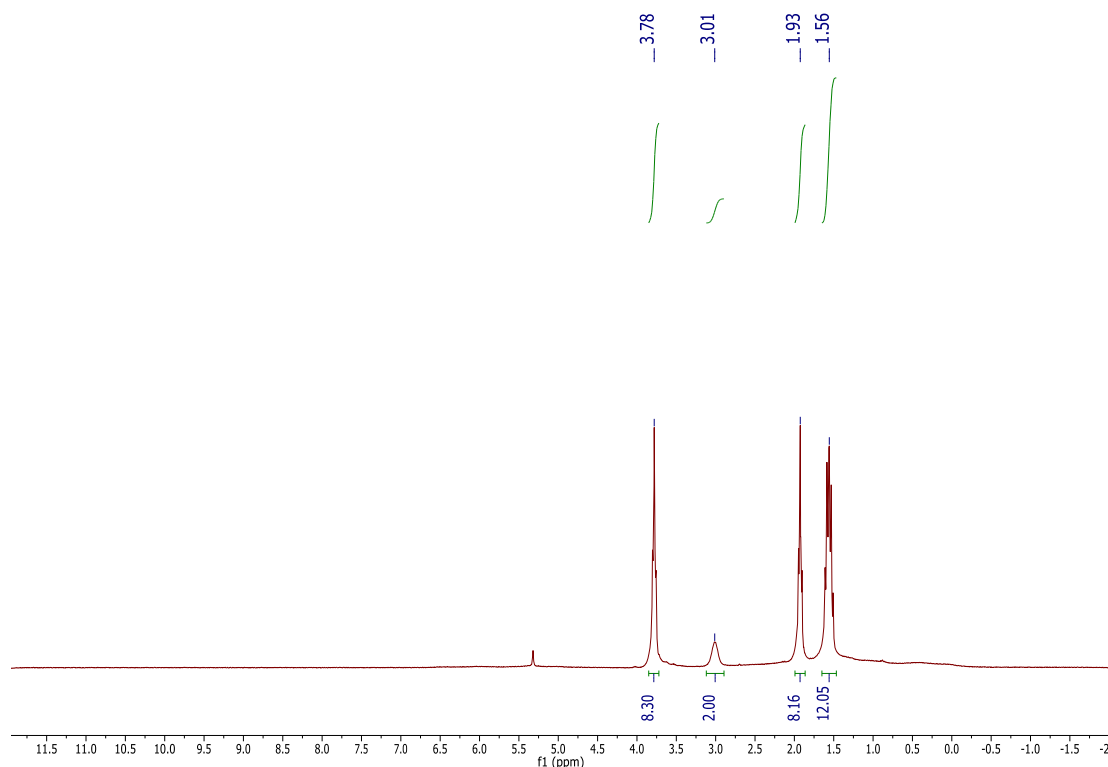

**Figure S17.** <sup>1</sup>H NMR (300 MHz, CD<sub>2</sub>Cl<sub>2</sub>, 25 °C) of compound **5**[Li<sup>+</sup>]. Note that THF is bound to Li<sup>+</sup> counteraction.

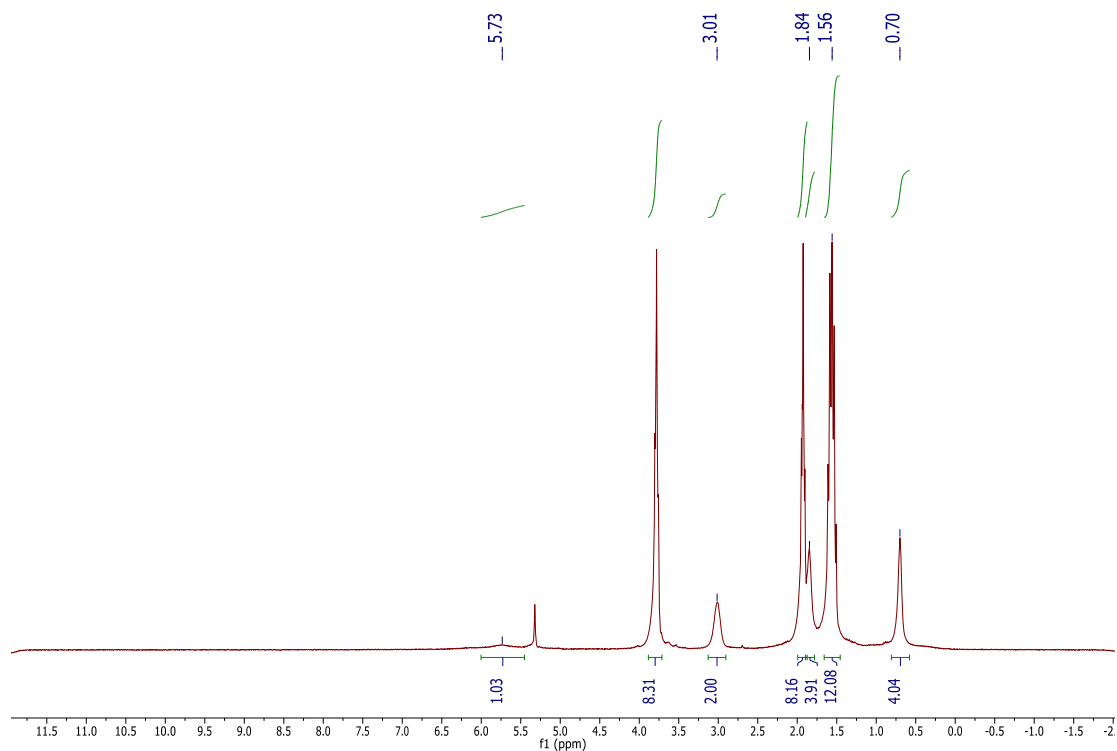

**Figure S18.**  $^1\text{H}\{^{11}\text{B}\}$  NMR (300 MHz,  $\text{CD}_2\text{Cl}_2$ , 25 °C) of compound **5**[ $\text{Li}^+$ ]. Note that THF is bound to  $\text{Li}^+$  counteranion.

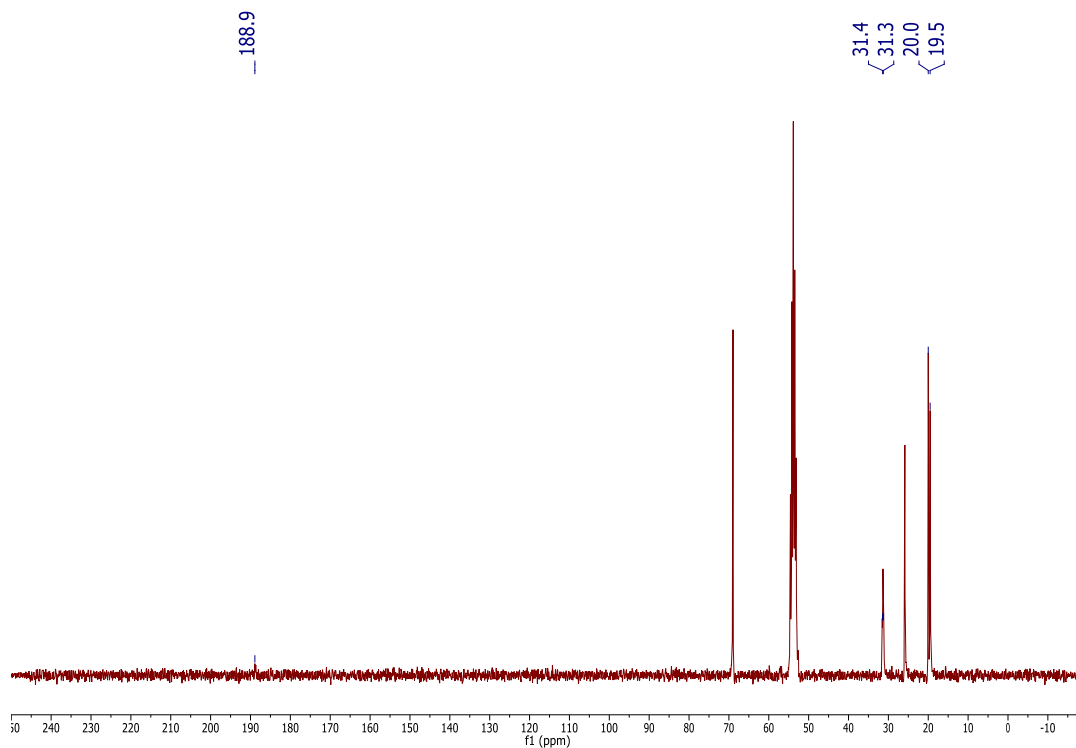

**Figure S19.**  $^{13}\text{C}\{^1\text{H}\}$  NMR (75 MHz,  $\text{CD}_2\text{Cl}_2$ , 25 °C) of compound **5**[ $\text{Li}^+$ ].

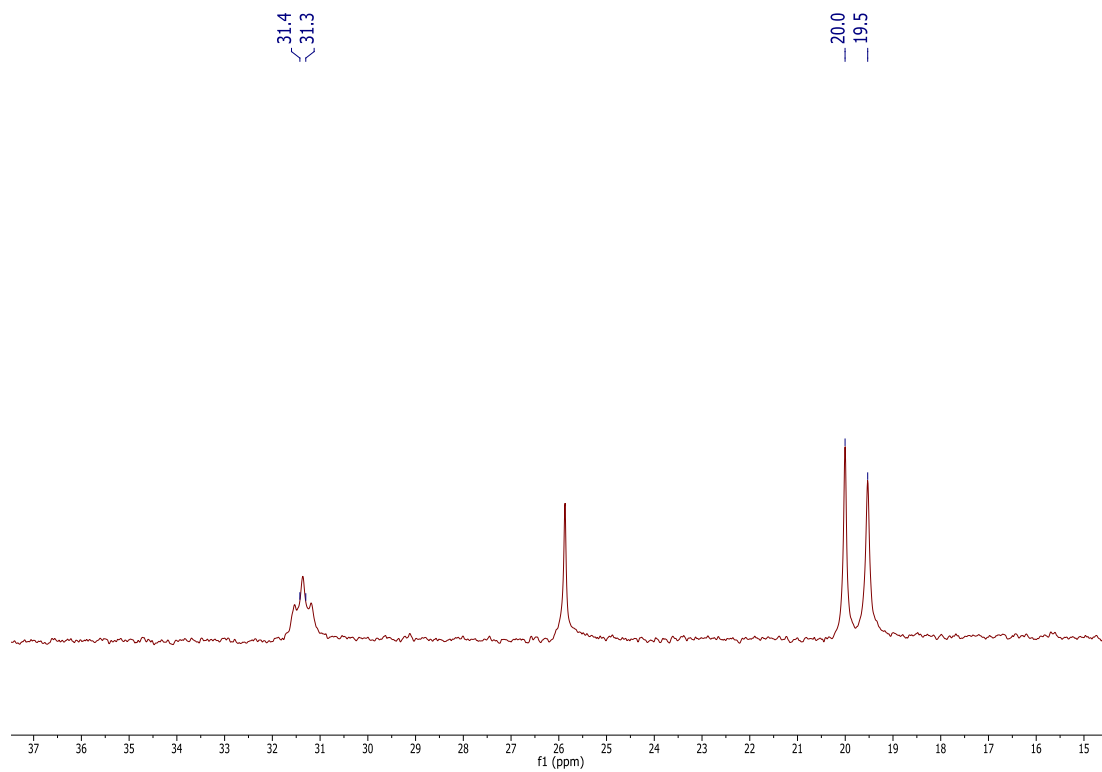

**Figure S20.**  $^{13}\text{C}\{^1\text{H}\}$  NMR (75 MHz,  $\text{CD}_2\text{Cl}_2$ , 25 °C) of compound **5**[Li<sup>+</sup>] (zoomed in).

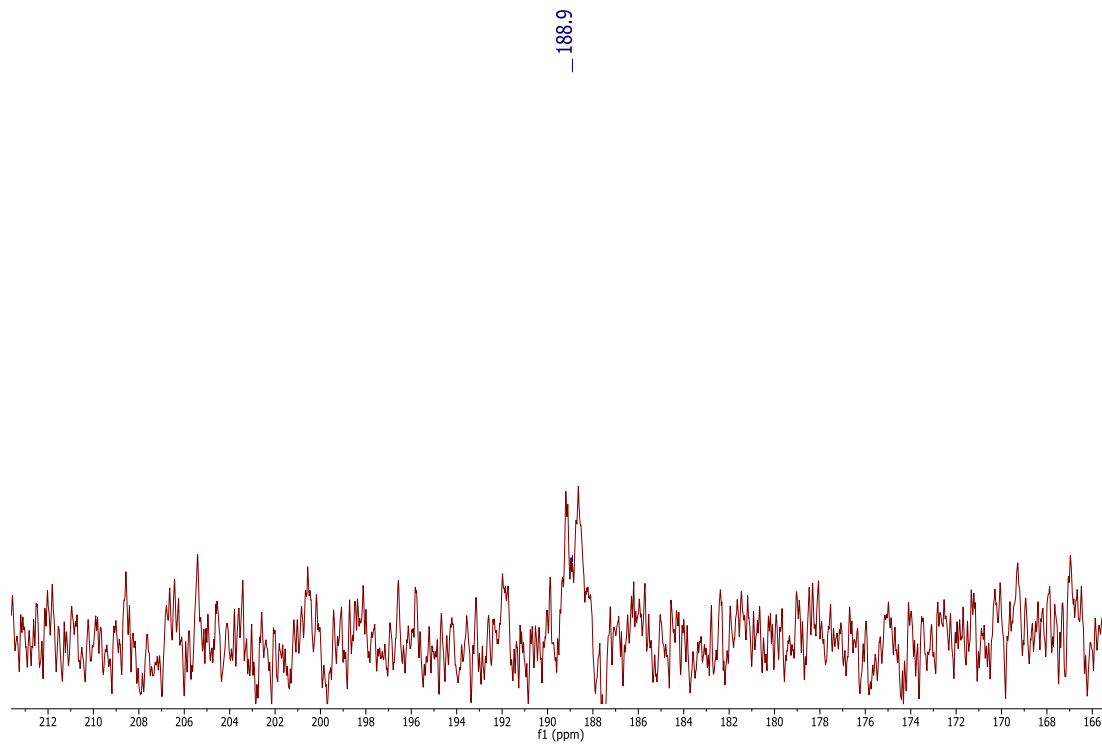

**Figure S21.**  $^{13}\text{C}\{^1\text{H}\}$  NMR (126 MHz,  $\text{CD}_2\text{Cl}_2$ , 25 °C) of compound **5**[Li<sup>+</sup>] (zoomed in on CO resonance)

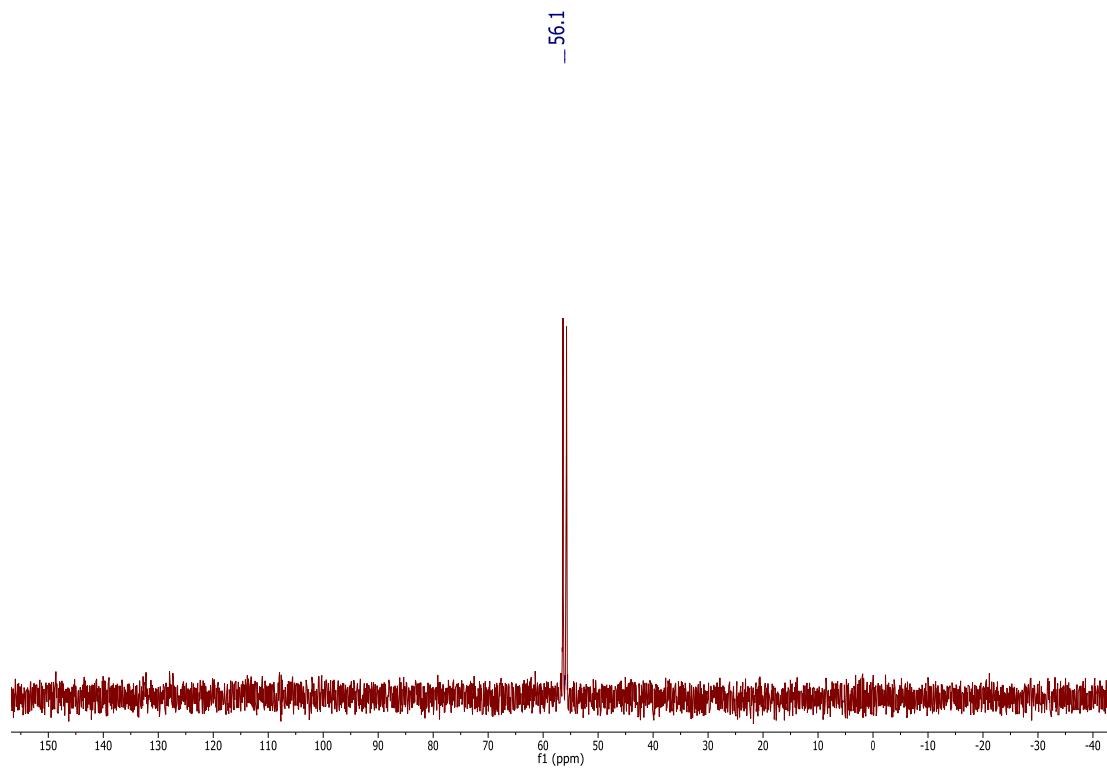

**Figure S22.**  $^{31}\text{P}\{^1\text{H}\}$  NMR (162 MHz,  $\text{CD}_2\text{Cl}_2$ , 25 °C) of compound **5**[ $\text{Li}^+$ ].

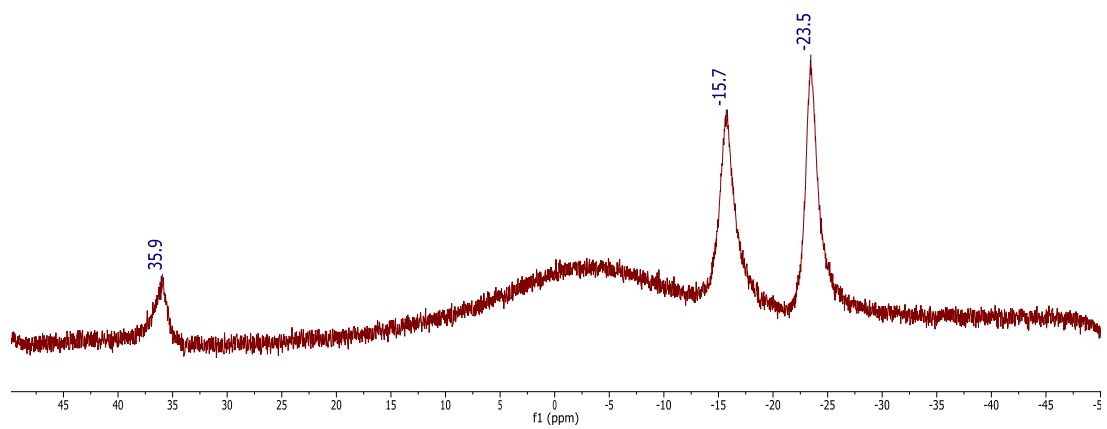

**Figure S23.**  $^{11}\text{B}\{^1\text{H}\}$  NMR (96 MHz,  $\text{CD}_2\text{Cl}_2$ , 25 °C) of compound **5**[ $\text{Li}^+$ ].



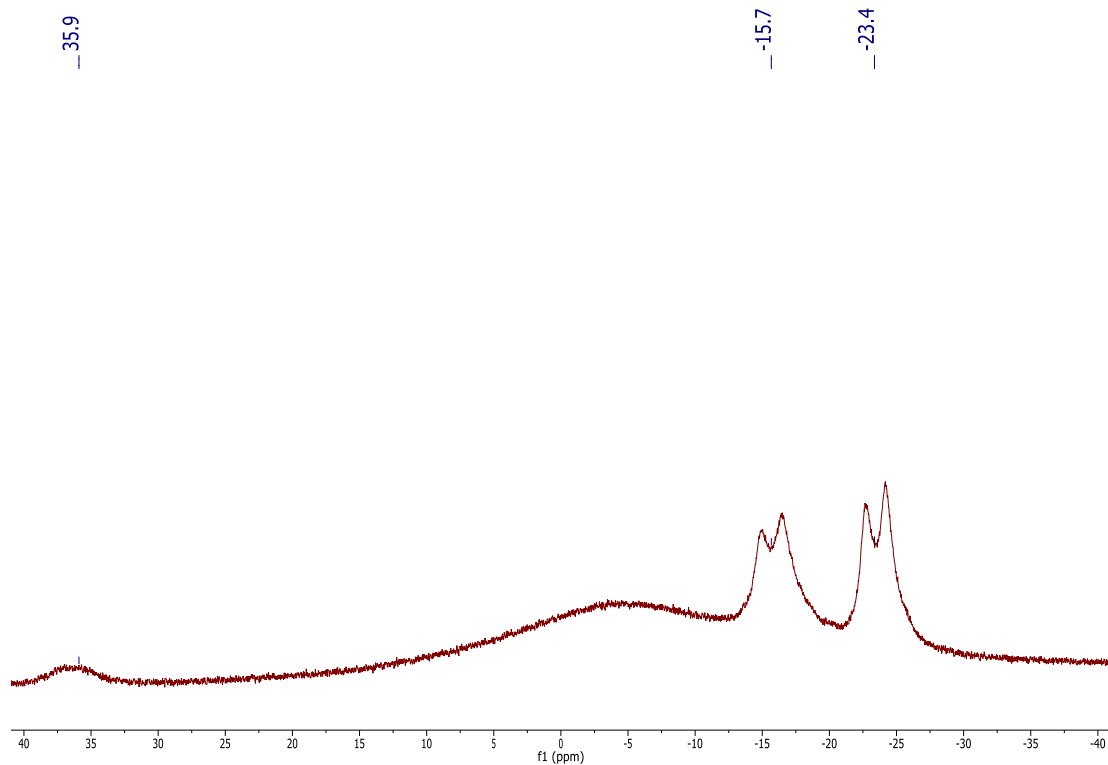

Figure S24.  $^{11}\text{B}$  NMR (96 MHz,  $\text{CD}_2\text{Cl}_2$ , 25  $^\circ\text{C}$ ) of compound  $5[\text{Li}^+]$ .

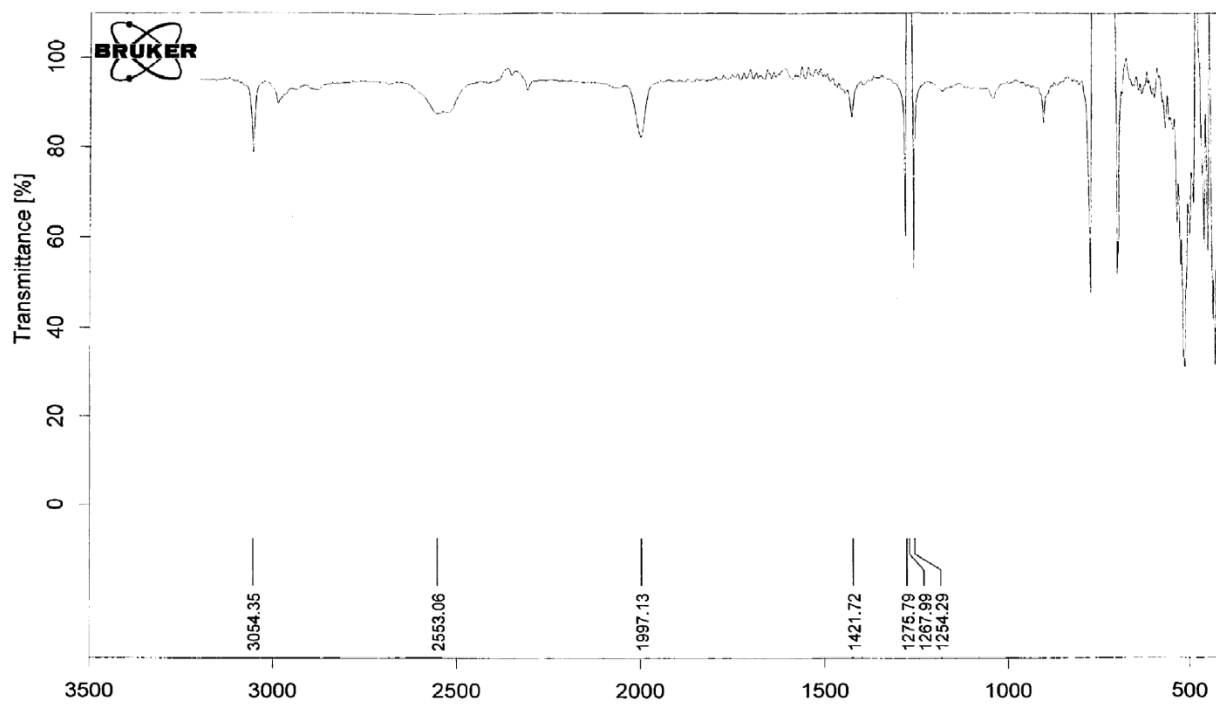

Figure S25. IR of compound  $5[\text{Li}^+]$  ( $\text{CH}_2\text{Cl}_2$ ).

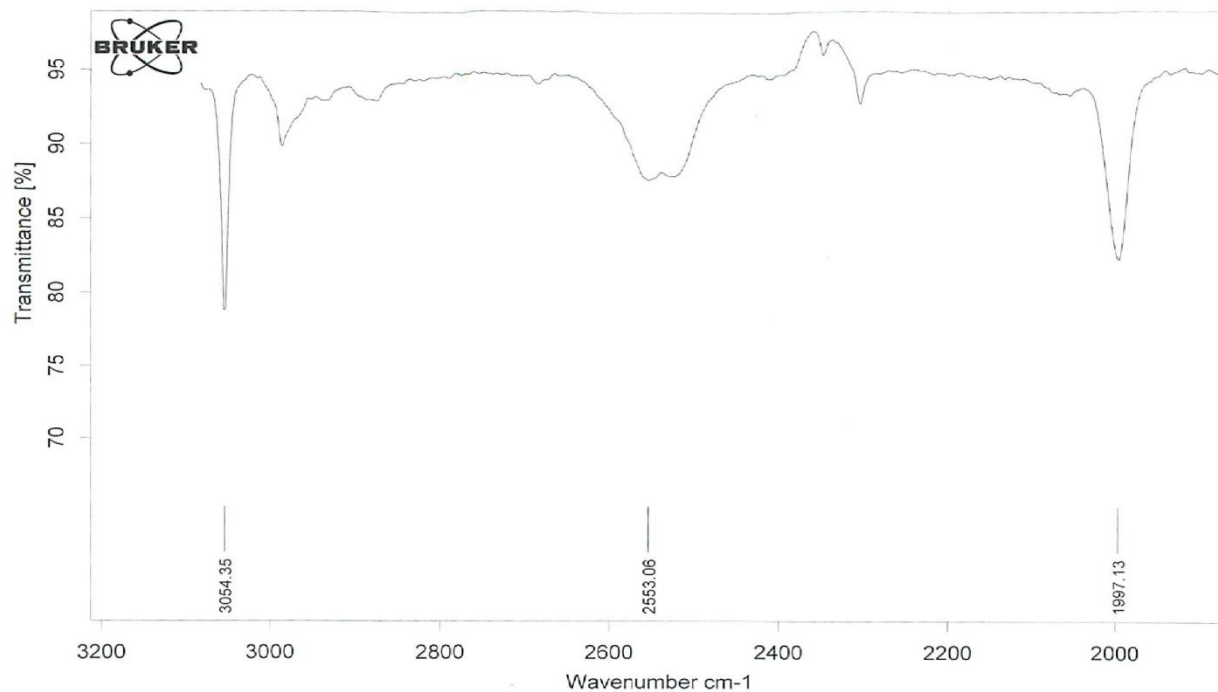

**Figure S26.** IR of compound **5**[Li<sup>+</sup>] (CH<sub>2</sub>Cl<sub>2</sub>) zoomed in.

### **Compound 7[Li<sup>+</sup>] Synthesis and Spectroscopic Data**

A solution of **8**[Li<sup>+</sup>] in CD<sub>2</sub>Cl<sub>2</sub> was added to a young tube. This solution was degassed via freeze-pump-thaw. Upon removal of all gases, the young tube was charged with CO gas and analyzed via NMR to observe a downward shift in the <sup>31</sup>P{<sup>1</sup>H} NMR, indicating full conversion to the desired product **7**[Li<sup>+</sup>]. <sup>1</sup>H NMR (400 MHz, CD<sub>2</sub>Cl<sub>2</sub>, 25 °C) δ = 3.78 (m, 4H, THF), 3.48 (q, 4H, Et<sub>2</sub>O), 2.70 (bm, 2H, CH), 2.14 (bs, BH), 1.93 (m, 4H, THF), 1.66 (bs, BH), 1.49 (dd, 6H, CH<sub>3</sub>, <sup>3</sup>J(P-H) = 18.2 Hz, <sup>3</sup>J(H-H) = 7.5 Hz), 1.44 (dd, 6H, CH<sub>3</sub>, <sup>3</sup>J(P-H) = 14.7 Hz, <sup>3</sup>J(H-H) = 6.9 Hz), 1.17 (t, 6H, Et<sub>2</sub>O) ppm. <sup>31</sup>P{<sup>1</sup>H} NMR (121 MHz, CD<sub>2</sub>Cl<sub>2</sub>, 25 °C) δ = 66.7 (d, <sup>1</sup>J(Rh-P) = 106.7 Hz) ppm. <sup>11</sup>B{<sup>1</sup>H} NMR (96 MHz, CD<sub>2</sub>Cl<sub>2</sub>, 25 °C) δ = 0.6, -8.7, -9.5 ppm. <sup>11</sup>B NMR (96 MHz, CD<sub>2</sub>Cl<sub>2</sub>, 25 °C) δ = 0.6 (d, <sup>1</sup>J(B-H) = 131.7 Hz), -8.7 (d, <sup>1</sup>J(B-H) = 134.4 Hz), -9.5 (d, <sup>1</sup>J(B-H) = 134.4 Hz) ppm. IR (CH<sub>2</sub>Cl<sub>2</sub>): 2539 cm<sup>-1</sup> (B-H stretch), 2012 cm<sup>-1</sup> (CO stretch).

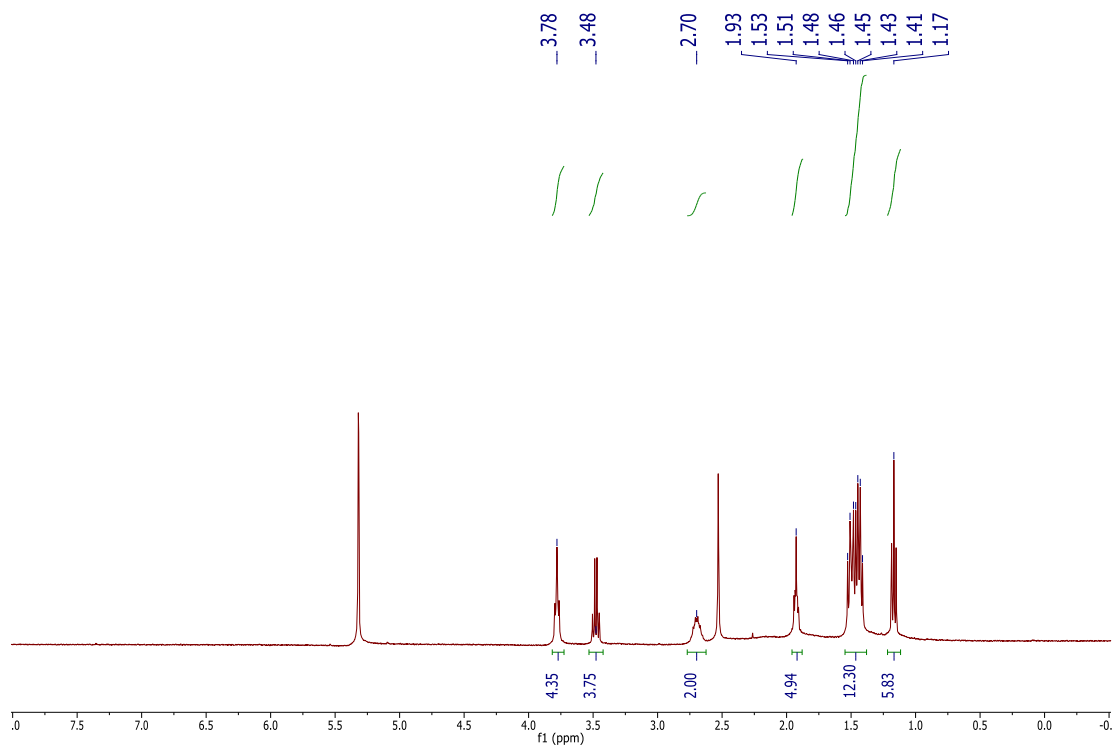

**Figure S27.**  $^1\text{H}$  NMR (400 MHz,  $\text{CD}_2\text{Cl}_2$ , 25 C) of compound **7** $[\text{Li}^+]$ . Note that THF and  $\text{Et}_2\text{O}$  molecules are coordinated to  $\text{Li}^+$  counteranion.

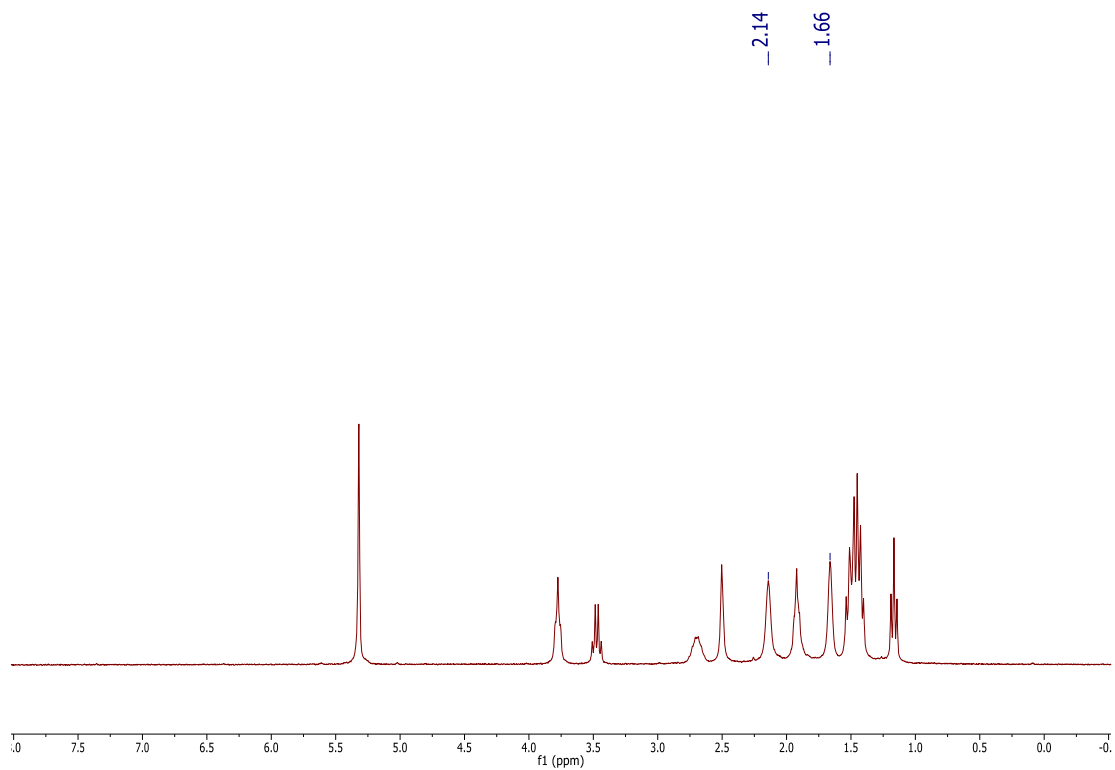

**Figure S28.**  $^1\text{H}\{^{11}\text{B}\}$  NMR (300 MHz,  $\text{CD}_2\text{Cl}_2$ , 25 C) of compound **7** $[\text{Li}^+]$  to indicate B-H resonances.

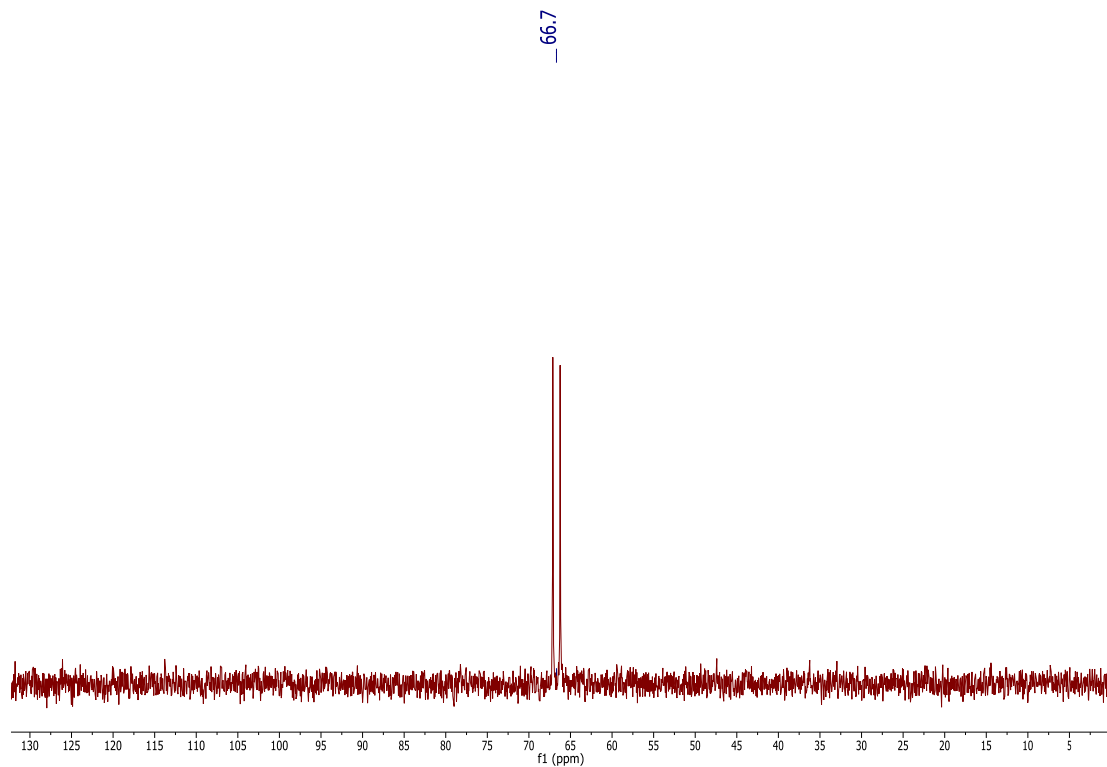

**Figure S29.**  $^{31}\text{P}\{^1\text{H}\}$  NMR (121 MHz,  $\text{CD}_2\text{Cl}_2$ , 25 C) of compound **7**[ $\text{Li}^+$ ].

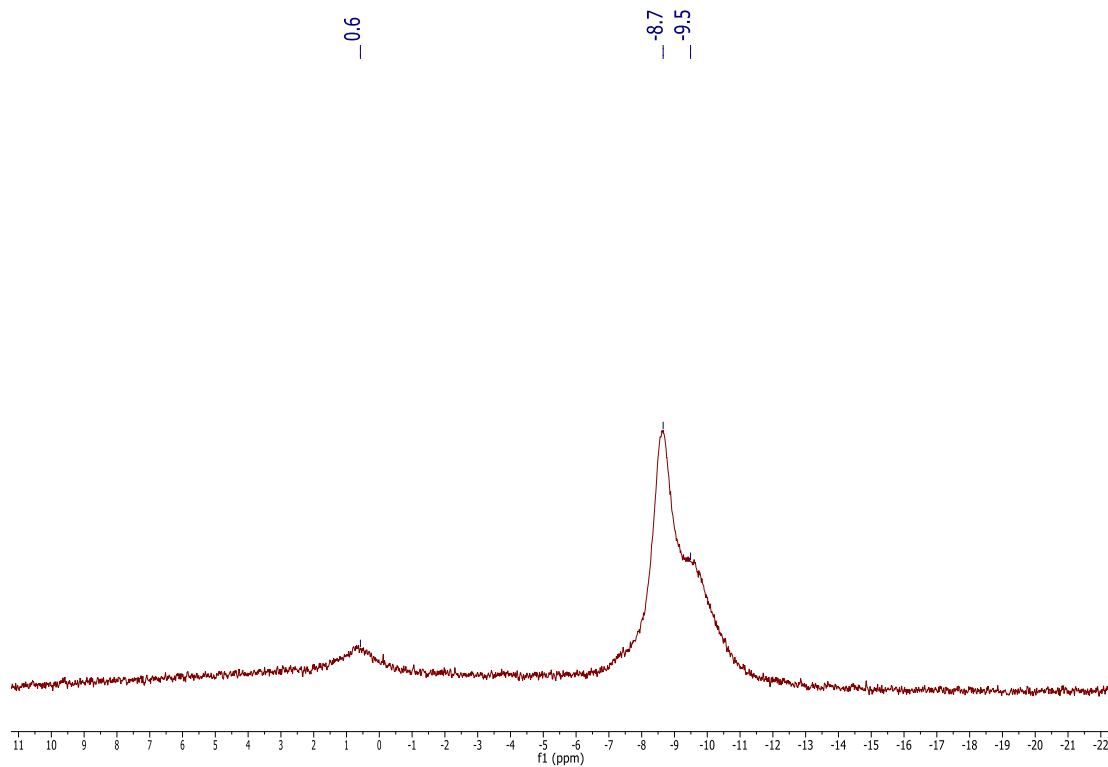

**Figure S30.**  $^{11}\text{B}\{^1\text{H}\}$  NMR (96 MHz,  $\text{CD}_2\text{Cl}_2$ , 25 C) of compound **7**[ $\text{Li}^+$ ].

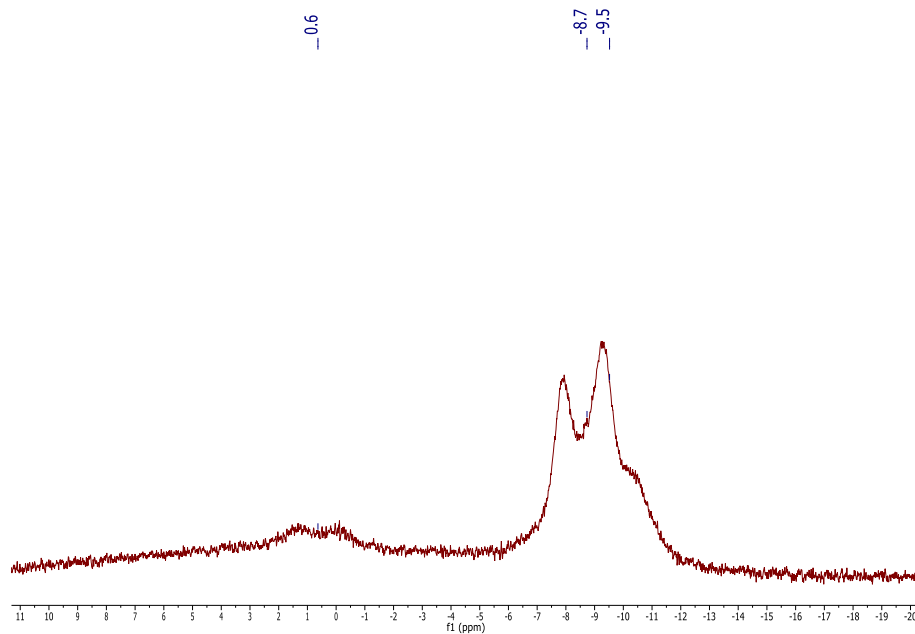

**Figure S31.**  $^{11}\text{B}$  NMR (96 MHz,  $\text{CD}_2\text{Cl}_2$ , 25 C) of compound  $7[\text{Li}^+]$ .

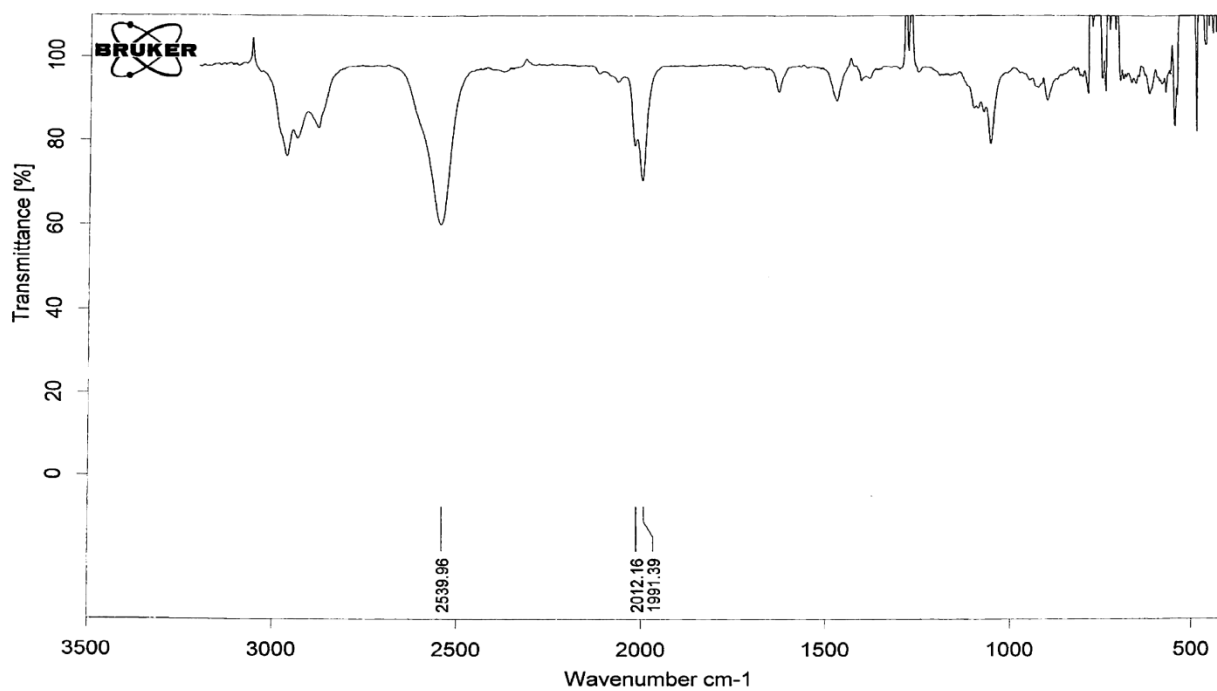

**Figure S32.** IR of compound  $7[\text{Li}^+]$  ( $\text{CH}_2\text{Cl}_2$ ). The signal at  $1991\text{ cm}^{-1}$  corresponds to the mono CO compound  $8[\text{Li}^+]$ , which inevitably forms during IR sample preparation. This can be explained by the fact that the IR cell we utilized requires taking up a solution of  $7[\text{Li}^+]$  via syringe and injecting the solution into the cell. Lastly, the cell is capped. Because of the lability of the CO ligand of  $7[\text{Li}^+]$  a small amount of  $8[\text{Li}^+]$  reforms during sample preparation.

### Compound 8[Li<sup>+</sup>] Synthesis and Spectroscopic Data

[Rh(CO)<sub>2</sub>Cl]<sub>2</sub> (24.5 mg, 0.06 mmol) was dissolved in 4 mL CH<sub>2</sub>Cl<sub>2</sub> and a 4 mL CH<sub>2</sub>Cl<sub>2</sub> solution of AgBF<sub>4</sub> (24.5 mg, 0.12 mmol) was added and stirred for 15 minutes. The resulting red solution was filtered to remove AgCl. The resulting solution was added dropwise to a 7 mL solution of carboranyl phosphine **6**[Li<sup>+</sup>] (114.1 mg, 0.24 mmol) in CH<sub>2</sub>Cl<sub>2</sub>. The reaction was stirred for 30 min and then filtered to remove LiCl. The resulting solution was pumped to dryness and compound **8**[Li<sup>+</sup>] was extracted with 10 mL diethyl ether. Bright yellow crystals were obtained upon cooling this solution to -30 °C, which were filtered and pumped to dryness to afford compound **8**[Li<sup>+</sup>] in 60 % yield (126.0 mg, 0.15 mmol) (**Note:** Li<sup>+</sup> counteranion contains approximately 1 coordinated Et<sub>2</sub>O molecule and 1 THF molecule). <sup>1</sup>H NMR (400 MHz, CD<sub>2</sub>Cl<sub>2</sub>, 25 °C) δ = 3.84 (m, 3H, THF), 3.56 (q, 2H, Et<sub>2</sub>O), 2.57 (bm, 2H, CH), 1.96 (m, 3H, THF), 1.87 (bs, 1H, BH), 1.71 (bs, 5H, BH), 1.57 (bs, 5H, BH), 1.49 (dd, <sup>3</sup>J(P-H) = 18.8, <sup>3</sup>J(H-H) = 7.7 Hz, 6H, CH<sub>3</sub>), 1.34 (dd, <sup>3</sup>J(P-H) = 16.2, <sup>3</sup>J(H-H) = 7.1 Hz, 6H, CH<sub>3</sub>), 1.21 (t, 3H, Et<sub>2</sub>O) ppm. <sup>13</sup>C{<sup>1</sup>H} NMR (151 MHz, CD<sub>2</sub>Cl<sub>2</sub>, 25 °C) δ = 66.5 (C<sub>Carborane</sub>), 29.1 (d, CH, <sup>1</sup>J(P-C) = 9.7 Hz), 29.0 (d, CH, <sup>1</sup>J(P-C) = 9.7 Hz), 22.6 (CH<sub>3</sub>), 19.7 (CH<sub>3</sub>) ppm. <sup>31</sup>P{<sup>1</sup>H} NMR (121 MHz, CD<sub>2</sub>Cl<sub>2</sub>, 25 °C) δ = 49.8 (d, <sup>1</sup>J(P-Rh) = 110.6 Hz) ppm. <sup>11</sup>B{<sup>1</sup>H} NMR (96 MHz, CD<sub>2</sub>Cl<sub>2</sub>, 25 °C) δ = -2.4, -11.5, -13.9 ppm. <sup>11</sup>B NMR (96 MHz, CD<sub>2</sub>Cl<sub>2</sub>, 25 °C) δ = -2.4 (d, <sup>1</sup>J(B-H) = 140.6 Hz), -11.5 (d, <sup>1</sup>J(B-H) = 139.0 Hz), -13.9 (d, <sup>1</sup>J(B-H) = 145.4 Hz) ppm. HRMS (ESI): Calculated for C<sub>15</sub>H<sub>48</sub>B<sub>22</sub>P<sub>2</sub>O<sub>1</sub>Rh<sub>1</sub> [M]: 649.4584; Found: 649.4591. IR (CH<sub>2</sub>Cl<sub>2</sub>): 2544 cm<sup>-1</sup> (B-H stretch), 1991 cm<sup>-1</sup> (CO stretch). Anal. Calcd for Rh<sub>1</sub>P<sub>2</sub>C<sub>23</sub>H<sub>68</sub>B<sub>22</sub>O<sub>3</sub>Li<sub>1</sub>: C, 34.43; H, 8.54. Found: C, 34.48; H, 8.80. (**Note:** Li<sup>+</sup> counteranion contains 1 coordinated THF molecule and 1 Et<sub>2</sub>O molecule and this is taken into account in the molecular formula and is corroborated by <sup>1</sup>H NMR analysis.)

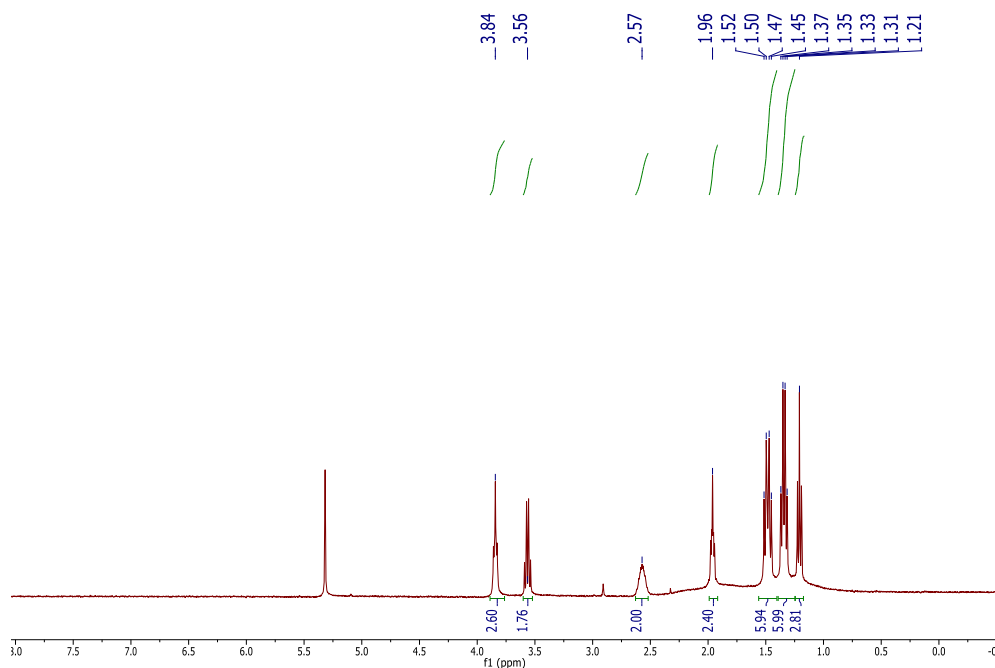

**Figure S33.** <sup>1</sup>H NMR (400 MHz, CD<sub>2</sub>Cl<sub>2</sub>, 25 °C) of compound **8**[Li<sup>+</sup>]. Note that THF and Et<sub>2</sub>O are bound to Li<sup>+</sup> counteranion.

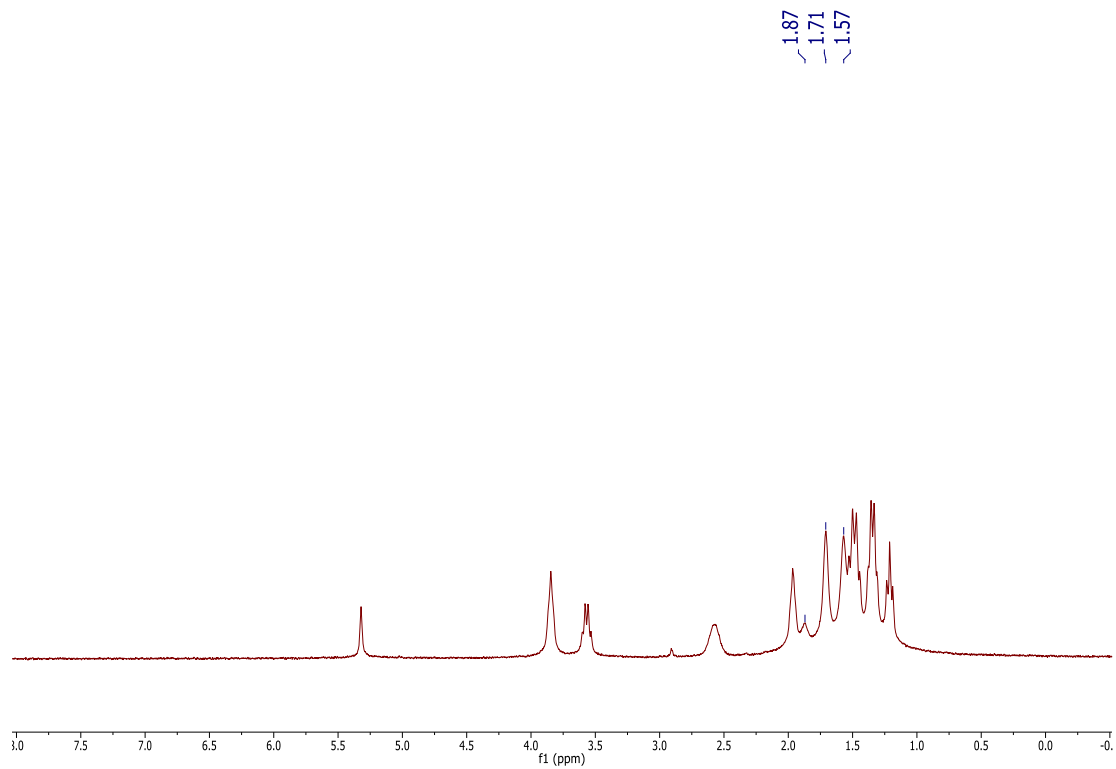

**Figure S34.**  $^1\text{H}\{^{11}\text{B}\}$  NMR (300 MHz,  $\text{CD}_2\text{Cl}_2$ , 25 °C) of compound **8**[ $\text{Li}^+$ ] to indicate B-H resonances.

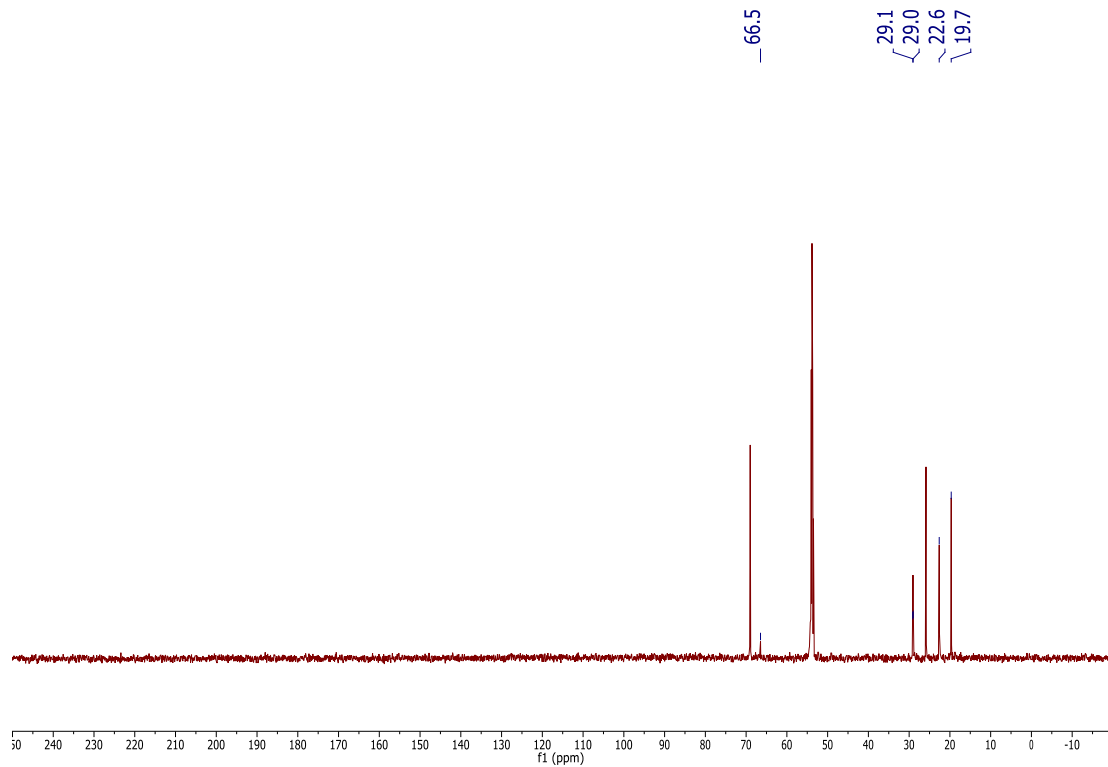

**Figure S35.**  $^{13}\text{C}\{^1\text{H}\}$  NMR (151 MHz,  $\text{CD}_2\text{Cl}_2$ , 25 °C) of compound **8**[ $\text{Li}^+$ ].

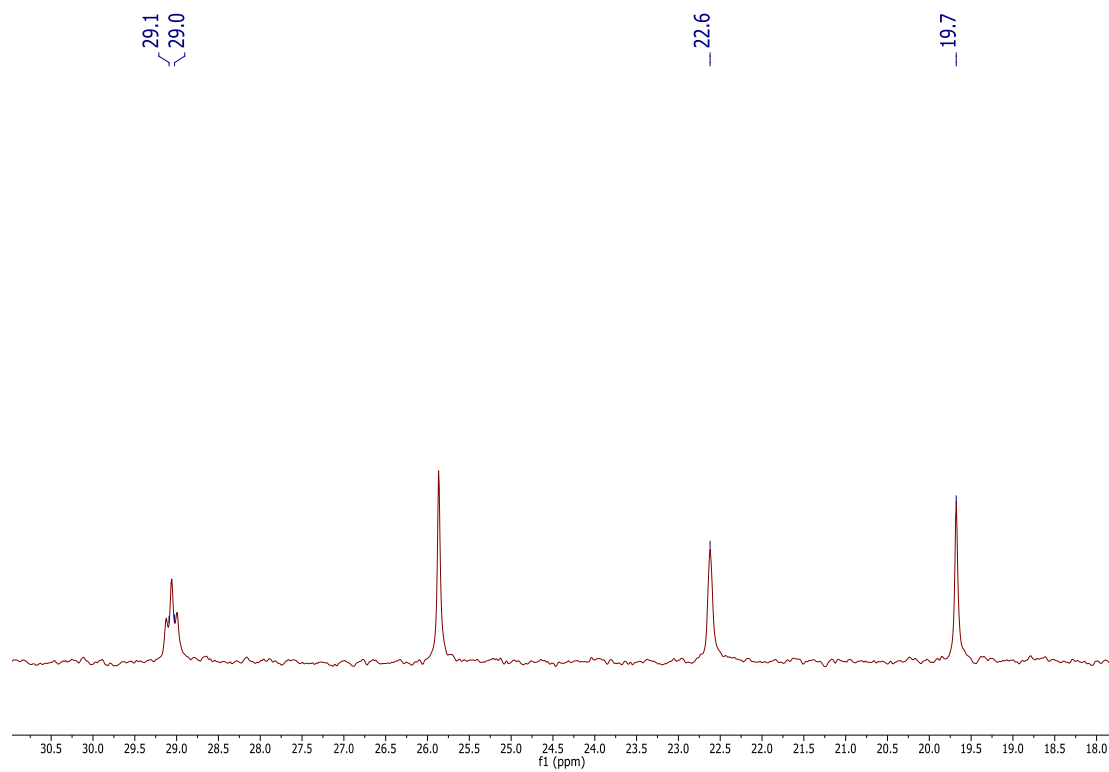

**Figure S36.**  $^{13}\text{C}\{^1\text{H}\}$  NMR (151 MHz,  $\text{CD}_2\text{Cl}_2$ , 25 °C) of compound **8[Li<sup>+</sup>]** (zoomed in).

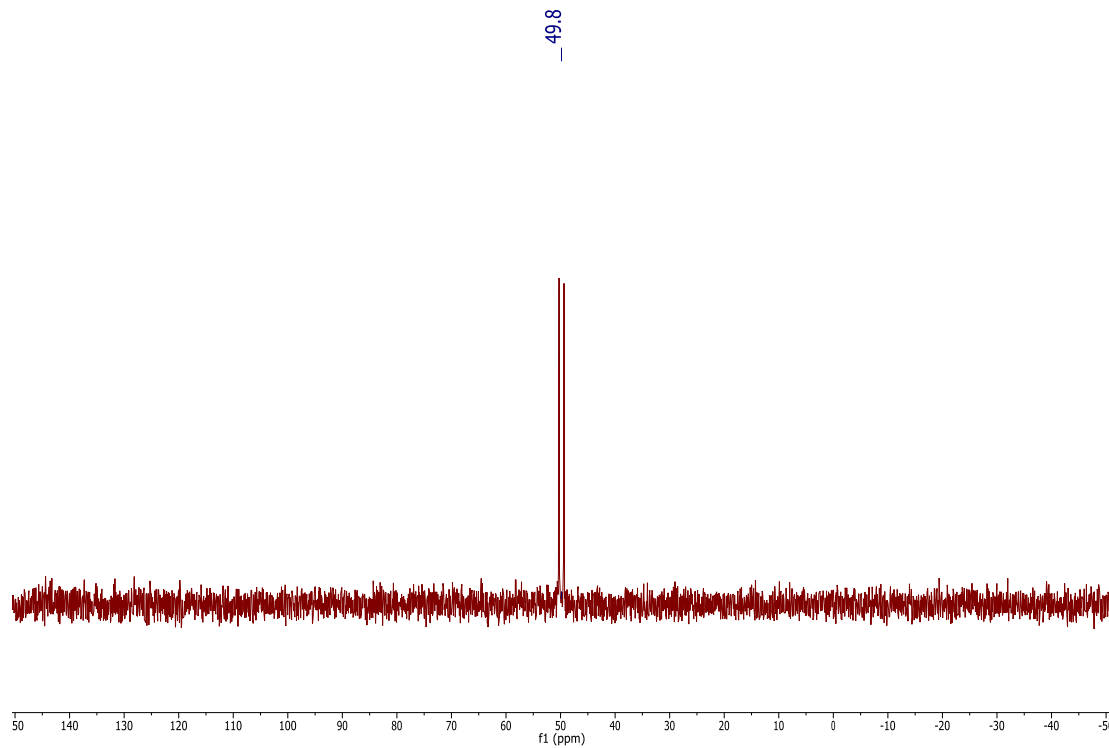

**Figure S37.**  $^{31}\text{P}\{^1\text{H}\}$  NMR (121 MHz,  $\text{CD}_2\text{Cl}_2$ , 25 C) of compound **8[Li<sup>+</sup>]**.



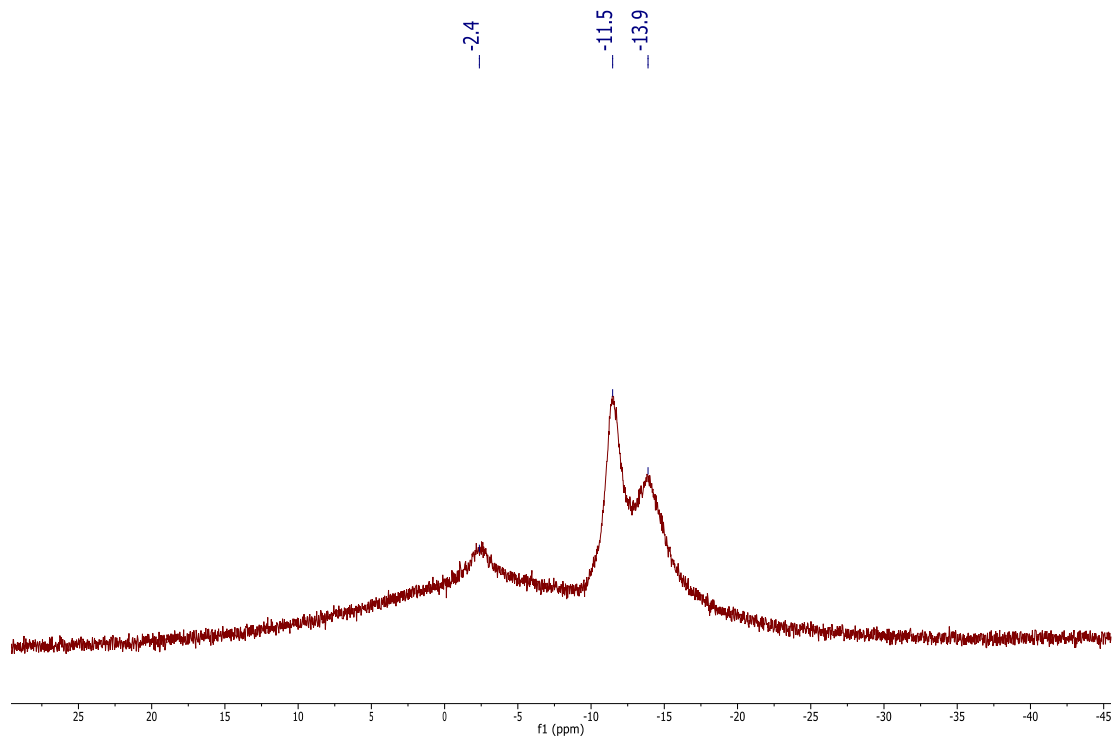

**Figure S38.**  $^{11}\text{B}\{^1\text{H}\}$  NMR (96 MHz,  $\text{CD}_2\text{Cl}_2$ , 25 °C) of compound **8**[Li $^+$ ].

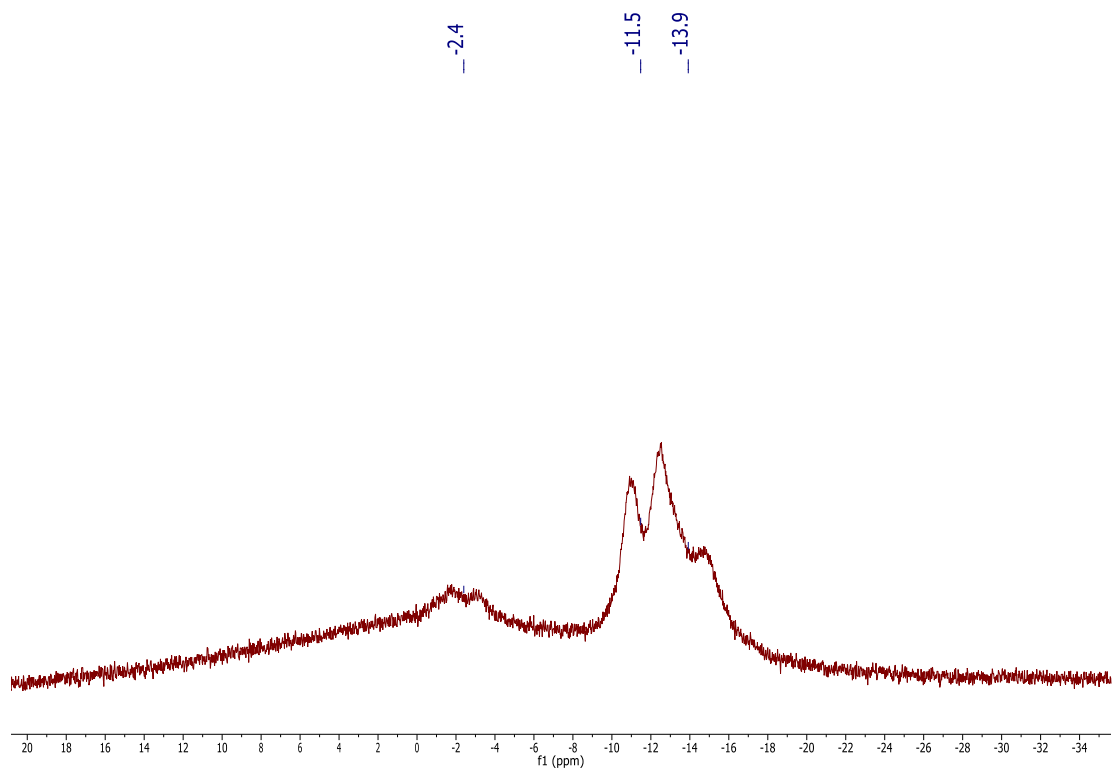

**Figure S39.**  $^{11}\text{B}$  NMR (96 MHz,  $\text{CD}_2\text{Cl}_2$ , 25 °C) of compound **8**[Li $^+$ ].

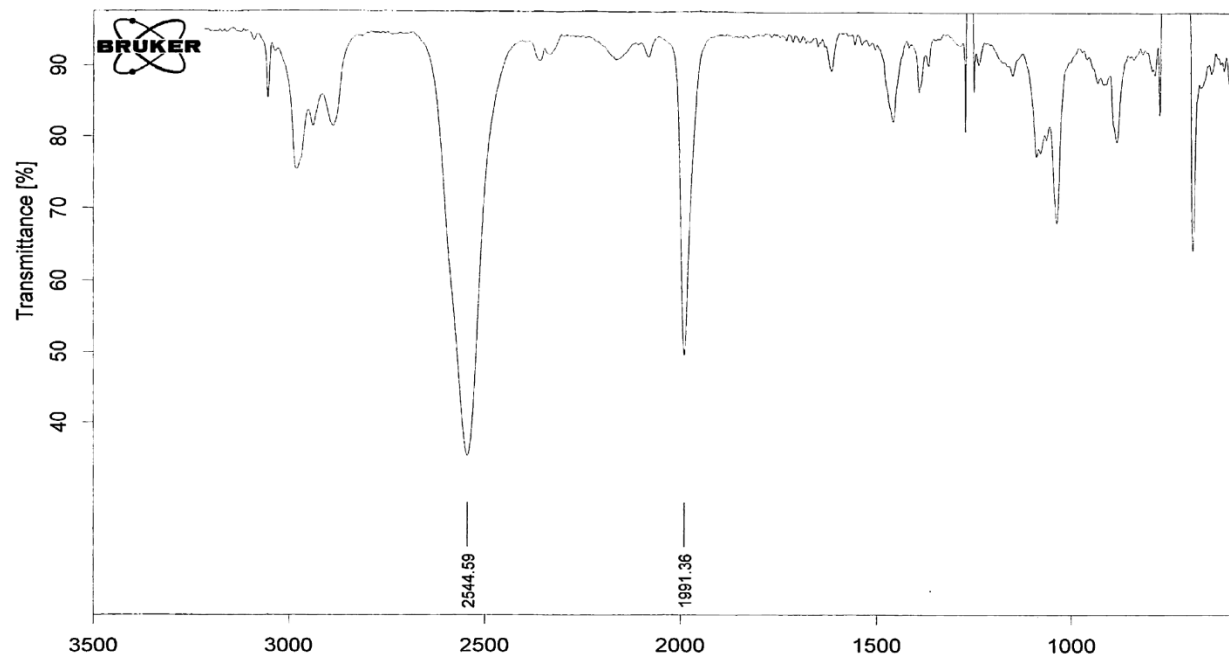

Figure S40. IR of compound **8**[Li<sup>+</sup>] (CH<sub>2</sub>Cl<sub>2</sub>).

### X-Ray Structure Data, Complex 5[Li<sup>+</sup>]

A yellow fragment of a prism (0.510 x 0.337 x 0.113 mm<sup>3</sup>) was used for the single crystal x-ray diffraction study of [C<sub>48</sub>H<sub>124</sub>B<sub>36</sub>O<sub>8</sub>P<sub>4</sub>Li<sub>2</sub>Rh<sub>2</sub>].[C<sub>6</sub>H<sub>6</sub>]<sub>2</sub> (sample vL139JE\_0m). The crystal was coated with paratone oil and mounted on to a cryo-loop glass fiber. X-ray intensity data were collected at 100(2) K on a Bruker APEX2 platform-CCD x-ray diffractometer system (fine focus Mo-radiation,  $\lambda = 0.71073 \text{ \AA}$ , 50KV/30mA power). The CCD detector was placed at a distance of 5.0600 cm from the crystal.

A total of 2880 frames were collected for a sphere of reflections (with scan width of 0.5° in  $\omega$  and  $\phi$ , starting  $\omega$  and  $2\theta$  angles of  $-30^\circ$ , and  $\phi$  angles of  $0^\circ$ ,  $90^\circ$ ,  $120^\circ$ ,  $180^\circ$ ,  $240^\circ$ , and  $270^\circ$  for every 360 frames, and 720 frames with  $\phi$ -scan from 0-360°, 10 sec/frame exposure time). The frames were integrated using the Bruker SAINT software package and using a narrow-frame integration algorithm. Based on a triclinic crystal system, the integrated frames yielded a total of 63606 reflections at a maximum  $2\theta$  angle of  $59.150^\circ$  (0.72 Å resolution), of which 12812 were independent reflections ( $R_{\text{int}} = 0.0205$ ,  $R_{\text{sig}} = 0.0155$ , redundancy = 5.0, completeness = 99.9%) and 11941 (93.2%) reflections were greater than  $2\sigma(I)$ . The unit cell parameters were,  $\mathbf{a} = 8.5563(3) \text{ \AA}$ ,  $\mathbf{b} = 14.8524(5) \text{ \AA}$ ,  $\mathbf{c} = 18.6442(6) \text{ \AA}$ ,  $\alpha = 80.7720(4)^\circ$ ,  $\beta = 80.2282(4)^\circ$ ,  $\gamma = 81.5074(4)^\circ$ ,  $V = 2287.00(13) \text{ \AA}^3$ ,  $Z = 1$ , calculated density  $D_c = 1.248 \text{ g/cm}^3$ . Absorption corrections were applied (absorption coefficient  $\mu = 0.476 \text{ mm}^{-1}$ ; min/max transmission = 0.793/0.948) to the raw intensity data using the SADABS program.

The Bruker SHELXTL software package was used for phase determination and structure refinement. The distribution of intensities ( $E^2-1 = 0.858$ ) and no systematic absent reflections indicated two possible space groups, P-1 and P1. The space group P-1 (#2) was later determined to be correct. Direct methods of phase determination followed by two Fourier cycles of refinement led to an electron density map from which most of the non-hydrogen atoms were identified in the asymmetric unit of the unit cell. With subsequent isotropic refinement, all of the non-hydrogen atoms were identified. There was half a molecule of C<sub>48</sub>H<sub>124</sub>B<sub>36</sub>O<sub>8</sub>P<sub>4</sub>Li<sub>2</sub>Rh<sub>2</sub> and one solvent molecule of benzene present in the asymmetric unit of the unit cell. The C<sub>48</sub>H<sub>124</sub>B<sub>36</sub>O<sub>8</sub>P<sub>4</sub>Li<sub>2</sub>Rh<sub>2</sub> molecule was located at the inversion center.

Atomic coordinates, isotropic and anisotropic displacement parameters of all the non-hydrogen atoms were refined by means of a full matrix least-squares procedure on  $F^2$ . The H-atoms were included in the refinement in calculated positions riding on the atoms to which they were attached. The refinement converged at  $R1 = 0.0212$ ,  $wR2 = 0.0539$ , with intensity  $I > 2\sigma(I)$ . The largest peak/hole in the final difference map was 0.590/-0.672 e/Å<sup>3</sup>.

Table 1. Crystal data and structure refinement for vL139JE\_0m.

|                                   |                                             |                               |
|-----------------------------------|---------------------------------------------|-------------------------------|
| Identification code               | vL139JE_0m                                  |                               |
| Empirical formula                 | C60 H136 B36 Li2 O8 P4 Rh2                  |                               |
| Formula weight                    | 1718.42                                     |                               |
| Temperature                       | 100(2) K                                    |                               |
| Wavelength                        | 0.71073 Å                                   |                               |
| Crystal system                    | Triclinic                                   |                               |
| Space group                       | P -1 (#2)                                   |                               |
| Unit cell dimensions              | a = 8.5563(3) Å                             | $\alpha = 80.7720(4)^\circ$ . |
|                                   | b = 14.8524(5) Å                            | $\beta = 80.2282(4)^\circ$ .  |
|                                   | c = 18.6442(6) Å                            | $\gamma = 81.5074(4)^\circ$ . |
| Volume                            | 2287.00(13) Å <sup>3</sup>                  |                               |
| Z                                 | 1                                           |                               |
| Density (calculated)              | 1.248 Mg/m <sup>3</sup>                     |                               |
| Absorption coefficient            | 0.476 mm <sup>-1</sup>                      |                               |
| F(000)                            | 896                                         |                               |
| Crystal size                      | 0.510 x 0.337 x 0.113 mm <sup>3</sup>       |                               |
| Theta range for data collection   | 1.666 to 29.575°.                           |                               |
| Index ranges                      | -11 ≤ h ≤ 11, -20 ≤ k ≤ 20, -25 ≤ l ≤ 25    |                               |
| Reflections collected             | 63606                                       |                               |
| Independent reflections           | 12812 [R(int) = 0.0205]                     |                               |
| Completeness to theta = 25.242°   | 100.0 %                                     |                               |
| Absorption correction             | Semi-empirical from equivalents             |                               |
| Refinement method                 | Full-matrix least-squares on F <sup>2</sup> |                               |
| Data / restraints / parameters    | 12812 / 0 / 513                             |                               |
| Goodness-of-fit on F <sup>2</sup> | 1.055                                       |                               |
| Final R indices [I > 2σ(I)]       | R1 = 0.0212, wR2 = 0.0539                   |                               |
| R indices (all data)              | R1 = 0.0236, wR2 = 0.0555                   |                               |
| Extinction coefficient            | n/a                                         |                               |
| Largest diff. peak and hole       | 0.590 and -0.672 e.Å <sup>-3</sup>          |                               |

Table 2. Atomic coordinates ( $\times 10^4$ ) and equivalent isotropic displacement parameters ( $\text{\AA}^2 \times 10^3$ ) for vL139JE\_0m.  $U(\text{eq})$  is defined as one third of the trace of the orthogonalized  $U^{ij}$  tensor.

|        | x        | y       | z       | $U(\text{eq})$ |
|--------|----------|---------|---------|----------------|
| Rh(1)  | 1543(1)  | 2185(1) | 3808(1) | 11(1)          |
| C(1)   | 1729(1)  | 937(1)  | 4257(1) | 17(1)          |
| O(1)   | 1658(1)  | 206(1)  | 4541(1) | 25(1)          |
| C(2)   | 422(2)   | 3388(1) | 3590(1) | 23(1)          |
| O(2)   | -391(2)  | 4063(1) | 3550(1) | 40(1)          |
| P(1A)  | 1335(1)  | 1722(1) | 2682(1) | 11(1)          |
| B(2A)  | 1544(1)  | 2754(1) | 1101(1) | 15(1)          |
| B(3A)  | 3633(1)  | 2452(1) | 1280(1) | 16(1)          |
| B(4A)  | 3278(1)  | 3273(1) | 1948(1) | 15(1)          |
| B(5A)  | 1202(1)  | 3586(1) | 1766(1) | 14(1)          |
| B(6A)  | 1452(1)  | 3975(1) | 794(1)  | 15(1)          |
| B(7A)  | 3185(2)  | 3178(1) | 448(1)  | 16(1)          |
| B(8A)  | 4409(2)  | 3549(1) | 1052(1) | 17(1)          |
| B(9A)  | 2679(2)  | 4347(1) | 1393(1) | 16(1)          |
| B(10A) | 3296(2)  | 4300(1) | 485(1)  | 17(1)          |
| C(2A)  | 2538(1)  | 596(1)  | 2569(1) | 15(1)          |
| C(3A)  | 4258(1)  | 584(1)  | 2710(1) | 21(1)          |
| C(4A)  | 2499(2)  | 241(1)  | 1843(1) | 21(1)          |
| C(5A)  | -694(1)  | 1536(1) | 2556(1) | 16(1)          |
| C(6A)  | -1310(1) | 803(1)  | 3174(1) | 23(1)          |
| C(7A)  | -1915(1) | 2400(1) | 2529(1) | 28(1)          |
| C(1A)  | 2067(1)  | 2544(1) | 1911(1) | 13(1)          |
| P(1B)  | 2130(1)  | 2670(1) | 4864(1) | 12(1)          |
| C(1B)  | 454(1)   | 2636(1) | 5597(1) | 12(1)          |
| B(2B)  | -1386(1) | 2624(1) | 5476(1) | 16(1)          |
| B(3B)  | -721(1)  | 3488(1) | 5921(1) | 16(1)          |
| B(4B)  | 454(1)   | 2568(1) | 6470(1) | 15(1)          |
| B(5B)  | -232(1)  | 1702(1) | 6013(1) | 14(1)          |
| B(6B)  | -2365(2) | 1911(1) | 6247(1) | 18(1)          |
| B(7B)  | -2714(2) | 3169(1) | 6179(1) | 19(1)          |
| B(8B)  | -1421(2) | 3133(1) | 6883(1) | 19(1)          |

|        |          |          |         |       |
|--------|----------|----------|---------|-------|
| B(9B)  | -1064(2) | 1868(1)  | 6947(1) | 18(1) |
| B(10B) | -2931(2) | 2464(1)  | 6998(1) | 22(1) |
| C(2B)  | 3941(1)  | 2020(1)  | 5216(1) | 16(1) |
| C(3B)  | 3710(1)  | 1108(1)  | 5709(1) | 22(1) |
| C(4B)  | 5263(1)  | 1849(1)  | 4565(1) | 28(1) |
| C(5B)  | 2500(1)  | 3890(1)  | 4687(1) | 17(1) |
| C(6B)  | 2986(2)  | 4243(1)  | 5335(1) | 21(1) |
| C(7B)  | 3678(2)  | 4119(1)  | 3985(1) | 36(1) |
| Li(1)  | 4539(3)  | 5691(2)  | 776(1)  | 30(1) |
| O(1T)  | 5866(1)  | 5645(1)  | 1506(1) | 22(1) |
| C(1T)  | 7585(1)  | 5525(1)  | 1403(1) | 29(1) |
| C(2T)  | 8008(2)  | 5879(1)  | 2054(1) | 31(1) |
| C(3T)  | 6666(2)  | 5637(2)  | 2666(1) | 43(1) |
| C(4T)  | 5361(2)  | 5406(1)  | 2285(1) | 27(1) |
| O(2T)  | 2940(1)  | 6677(1)  | 640(1)  | 21(1) |
| C(5T)  | 1447(2)  | 6665(1)  | 374(1)  | 28(1) |
| C(6T)  | 509(2)   | 7602(1)  | 446(1)  | 32(1) |
| C(7T)  | 1144(2)  | 7893(1)  | 1073(1) | 35(1) |
| C(8T)  | 2891(2)  | 7520(1)  | 940(1)  | 29(1) |
| C(1S)  | 6444(2)  | 8584(1)  | 1180(1) | 32(1) |
| C(2S)  | 7112(2)  | 8806(1)  | 1743(1) | 32(1) |
| C(3S)  | 7896(2)  | 9577(1)  | 1634(1) | 39(1) |
| C(4S)  | 8006(3)  | 10122(1) | 967(1)  | 54(1) |
| C(5S)  | 7329(3)  | 9901(1)  | 399(1)  | 54(1) |
| C(6S)  | 6549(2)  | 9130(1)  | 508(1)  | 40(1) |

---

Table 3. Bond lengths [ $\text{\AA}$ ] and angles [ $^\circ$ ] for vL139JE\_0m.

---

|              |            |
|--------------|------------|
| Rh(1)-C(1)   | 1.9024(11) |
| Rh(1)-C(2)   | 1.9166(12) |
| Rh(1)-P(1A)  | 2.3534(3)  |
| Rh(1)-P(1B)  | 2.3554(3)  |
| C(1)-O(1)    | 1.1354(14) |
| C(2)-O(2)    | 1.1321(15) |
| P(1A)-C(1A)  | 1.8180(10) |
| P(1A)-C(2A)  | 1.8527(11) |
| P(1A)-C(5A)  | 1.8560(11) |
| B(2A)-C(1A)  | 1.6171(15) |
| B(2A)-B(6A)  | 1.8061(17) |
| B(2A)-B(7A)  | 1.8118(17) |
| B(2A)-B(5A)  | 1.8465(17) |
| B(2A)-B(3A)  | 1.8509(17) |
| B(2A)-H(2A)  | 1.1200     |
| B(3A)-C(1A)  | 1.6303(16) |
| B(3A)-B(7A)  | 1.8062(17) |
| B(3A)-B(8A)  | 1.8101(18) |
| B(3A)-B(4A)  | 1.8386(18) |
| B(3A)-H(3A)  | 1.1200     |
| B(4A)-C(1A)  | 1.6223(15) |
| B(4A)-B(8A)  | 1.8020(17) |
| B(4A)-B(9A)  | 1.8129(17) |
| B(4A)-B(5A)  | 1.8430(17) |
| B(4A)-H(4A)  | 1.1200     |
| B(5A)-C(1A)  | 1.6163(15) |
| B(5A)-B(9A)  | 1.7975(17) |
| B(5A)-B(6A)  | 1.7982(17) |
| B(5A)-H(5A)  | 1.1200     |
| B(6A)-B(10A) | 1.6973(17) |
| B(6A)-B(7A)  | 1.8490(18) |
| B(6A)-B(9A)  | 1.8500(17) |
| B(6A)-H(6A)  | 1.1200     |
| B(7A)-B(10A) | 1.6968(18) |

|               |            |
|---------------|------------|
| B(7A)-B(8A)   | 1.8541(18) |
| B(7A)-H(7A)   | 1.1200     |
| B(8A)-B(10A)  | 1.7074(18) |
| B(8A)-B(9A)   | 1.8448(18) |
| B(8A)-H(8A)   | 1.1200     |
| B(9A)-B(10A)  | 1.6935(17) |
| B(9A)-Li(1)   | 2.725(3)   |
| B(9A)-H(9A)   | 1.1200     |
| B(10A)-Li(1)  | 2.626(3)   |
| B(10A)-H(10A) | 1.1200     |
| C(2A)-C(3A)   | 1.5357(15) |
| C(2A)-C(4A)   | 1.5371(15) |
| C(2A)-H(2C)   | 1.0000     |
| C(3A)-H(3C)   | 0.9800     |
| C(3A)-H(3D)   | 0.9800     |
| C(3A)-H(3E)   | 0.9800     |
| C(4A)-H(4C)   | 0.9800     |
| C(4A)-H(4D)   | 0.9800     |
| C(4A)-H(4E)   | 0.9800     |
| C(5A)-C(7A)   | 1.5300(16) |
| C(5A)-C(6A)   | 1.5342(15) |
| C(5A)-H(5C)   | 1.0000     |
| C(6A)-H(6C)   | 0.9800     |
| C(6A)-H(6D)   | 0.9800     |
| C(6A)-H(6E)   | 0.9800     |
| C(7A)-H(7C)   | 0.9800     |
| C(7A)-H(7D)   | 0.9800     |
| C(7A)-H(7E)   | 0.9800     |
| P(1B)-C(1B)   | 1.8050(11) |
| P(1B)-C(5B)   | 1.8546(11) |
| P(1B)-C(2B)   | 1.8604(11) |
| C(1B)-B(4B)   | 1.6153(15) |
| C(1B)-B(5B)   | 1.6156(15) |
| C(1B)-B(3B)   | 1.6252(16) |
| C(1B)-B(2B)   | 1.6303(15) |
| B(2B)-B(7B)   | 1.7967(19) |



|               |            |
|---------------|------------|
| B(2B)-B(6B)   | 1.8042(18) |
| B(2B)-B(5B)   | 1.8299(17) |
| B(2B)-B(3B)   | 1.8376(17) |
| B(2B)-H(2B)   | 1.1200     |
| B(3B)-B(7B)   | 1.8027(18) |
| B(3B)-B(8B)   | 1.8109(18) |
| B(3B)-B(4B)   | 1.8494(17) |
| B(3B)-H(3B)   | 1.1200     |
| B(4B)-B(8B)   | 1.8061(18) |
| B(4B)-B(9B)   | 1.8078(17) |
| B(4B)-B(5B)   | 1.8626(17) |
| B(4B)-H(4B)   | 1.1200     |
| B(5B)-B(6B)   | 1.7951(17) |
| B(5B)-B(9B)   | 1.8056(17) |
| B(5B)-H(5B)   | 1.1200     |
| B(6B)-B(10B)  | 1.7008(19) |
| B(6B)-B(7B)   | 1.8352(19) |
| B(6B)-B(9B)   | 1.8415(18) |
| B(6B)-H(6B)   | 1.1200     |
| B(7B)-B(10B)  | 1.7072(19) |
| B(7B)-B(8B)   | 1.8447(19) |
| B(7B)-H(7B)   | 1.1200     |
| B(8B)-B(10B)  | 1.7091(18) |
| B(8B)-B(9B)   | 1.8464(19) |
| B(8B)-H(8B)   | 1.1200     |
| B(9B)-B(10B)  | 1.7033(19) |
| B(9B)-H(9B)   | 1.1200     |
| B(10B)-H(10B) | 1.1200     |
| C(2B)-C(3B)   | 1.5293(16) |
| C(2B)-C(4B)   | 1.5384(16) |
| C(2B)-H(2D)   | 1.0000     |
| C(3B)-H(3F)   | 0.9800     |
| C(3B)-H(3G)   | 0.9800     |
| C(3B)-H(3H)   | 0.9800     |
| C(4B)-H(4F)   | 0.9800     |
| C(4B)-H(4G)   | 0.9800     |

|             |            |
|-------------|------------|
| C(4B)-H(4H) | 0.9800     |
| C(5B)-C(6B) | 1.5321(16) |
| C(5B)-C(7B) | 1.5348(17) |
| C(5B)-H(5D) | 1.0000     |
| C(6B)-H(6F) | 0.9800     |
| C(6B)-H(6G) | 0.9800     |
| C(6B)-H(6H) | 0.9800     |
| C(7B)-H(7F) | 0.9800     |
| C(7B)-H(7G) | 0.9800     |
| C(7B)-H(7H) | 0.9800     |
| Li(1)-O(2T) | 1.868(2)   |
| Li(1)-O(1T) | 1.903(2)   |
| O(1T)-C(1T) | 1.4388(14) |
| O(1T)-C(4T) | 1.4451(14) |
| C(1T)-C(2T) | 1.513(2)   |
| C(1T)-H(1A) | 0.9900     |
| C(1T)-H(1B) | 0.9900     |
| C(2T)-C(3T) | 1.514(2)   |
| C(2T)-H(2E) | 0.9900     |
| C(2T)-H(2F) | 0.9900     |
| C(3T)-C(4T) | 1.5263(19) |
| C(3T)-H(3I) | 0.9900     |
| C(3T)-H(3J) | 0.9900     |
| C(4T)-H(4I) | 0.9900     |
| C(4T)-H(4J) | 0.9900     |
| O(2T)-C(8T) | 1.4423(15) |
| O(2T)-C(5T) | 1.4496(14) |
| C(5T)-C(6T) | 1.5128(19) |
| C(5T)-H(5E) | 0.9900     |
| C(5T)-H(5F) | 0.9900     |
| C(6T)-C(7T) | 1.515(2)   |
| C(6T)-H(6I) | 0.9900     |
| C(6T)-H(6J) | 0.9900     |
| C(7T)-C(8T) | 1.5090(19) |
| C(7T)-H(7I) | 0.9900     |
| C(7T)-H(7J) | 0.9900     |

|                   |            |
|-------------------|------------|
| C(8T)-H(8C)       | 0.9900     |
| C(8T)-H(8D)       | 0.9900     |
| C(1S)-C(6S)       | 1.377(2)   |
| C(1S)-C(2S)       | 1.381(2)   |
| C(1S)-H(1S)       | 0.9500     |
| C(2S)-C(3S)       | 1.380(2)   |
| C(2S)-H(2S)       | 0.9500     |
| C(3S)-C(4S)       | 1.367(3)   |
| C(3S)-H(3S)       | 0.9500     |
| C(4S)-C(5S)       | 1.393(3)   |
| C(4S)-H(4S)       | 0.9500     |
| C(5S)-C(6S)       | 1.380(3)   |
| C(5S)-H(5S)       | 0.9500     |
| C(6S)-H(6S)       | 0.9500     |
|                   |            |
| C(1)-Rh(1)-C(2)   | 154.36(5)  |
| C(1)-Rh(1)-P(1A)  | 90.39(3)   |
| C(2)-Rh(1)-P(1A)  | 94.51(3)   |
| C(1)-Rh(1)-P(1B)  | 91.15(3)   |
| C(2)-Rh(1)-P(1B)  | 87.51(3)   |
| P(1A)-Rh(1)-P(1B) | 171.907(9) |
| O(1)-C(1)-Rh(1)   | 172.32(10) |
| O(2)-C(2)-Rh(1)   | 169.93(12) |
| C(1A)-P(1A)-C(2A) | 107.10(5)  |
| C(1A)-P(1A)-C(5A) | 107.41(5)  |
| C(2A)-P(1A)-C(5A) | 103.40(5)  |
| C(1A)-P(1A)-Rh(1) | 111.11(3)  |
| C(2A)-P(1A)-Rh(1) | 111.12(4)  |
| C(5A)-P(1A)-Rh(1) | 116.08(4)  |
| C(1A)-B(2A)-B(6A) | 108.76(8)  |
| C(1A)-B(2A)-B(7A) | 108.91(8)  |
| B(6A)-B(2A)-B(7A) | 61.47(7)   |
| C(1A)-B(2A)-B(5A) | 55.15(6)   |
| B(6A)-B(2A)-B(5A) | 58.97(6)   |
| B(7A)-B(2A)-B(5A) | 101.65(8)  |
| C(1A)-B(2A)-B(3A) | 55.59(6)   |

|                   |           |
|-------------------|-----------|
| B(6A)-B(2A)-B(3A) | 102.14(8) |
| B(7A)-B(2A)-B(3A) | 59.08(7)  |
| B(5A)-B(2A)-B(3A) | 89.69(7)  |
| C(1A)-B(2A)-H(2A) | 121.4     |
| B(6A)-B(2A)-H(2A) | 120.7     |
| B(7A)-B(2A)-H(2A) | 120.8     |
| B(5A)-B(2A)-H(2A) | 131.4     |
| B(3A)-B(2A)-H(2A) | 130.9     |
| C(1A)-B(3A)-B(7A) | 108.59(8) |
| C(1A)-B(3A)-B(8A) | 108.78(9) |
| B(7A)-B(3A)-B(8A) | 61.69(7)  |
| C(1A)-B(3A)-B(4A) | 55.37(6)  |
| B(7A)-B(3A)-B(4A) | 102.31(8) |
| B(8A)-B(3A)-B(4A) | 59.19(7)  |
| C(1A)-B(3A)-B(2A) | 54.92(6)  |
| B(7A)-B(3A)-B(2A) | 59.38(7)  |
| B(8A)-B(3A)-B(2A) | 102.48(8) |
| B(4A)-B(3A)-B(2A) | 90.07(8)  |
| C(1A)-B(3A)-H(3A) | 121.8     |
| B(7A)-B(3A)-H(3A) | 120.6     |
| B(8A)-B(3A)-H(3A) | 120.5     |
| B(4A)-B(3A)-H(3A) | 130.9     |
| B(2A)-B(3A)-H(3A) | 130.9     |
| C(1A)-B(4A)-B(8A) | 109.54(8) |
| C(1A)-B(4A)-B(9A) | 108.58(8) |
| B(8A)-B(4A)-B(9A) | 61.37(7)  |
| C(1A)-B(4A)-B(3A) | 55.78(6)  |
| B(8A)-B(4A)-B(3A) | 59.62(7)  |
| B(9A)-B(4A)-B(3A) | 102.27(8) |
| C(1A)-B(4A)-B(5A) | 55.16(6)  |
| B(8A)-B(4A)-B(5A) | 102.17(8) |
| B(9A)-B(4A)-B(5A) | 58.90(6)  |
| B(3A)-B(4A)-B(5A) | 90.18(7)  |
| C(1A)-B(4A)-H(4A) | 121.3     |
| B(8A)-B(4A)-H(4A) | 120.4     |
| B(9A)-B(4A)-H(4A) | 120.9     |

|                    |           |
|--------------------|-----------|
| B(3A)-B(4A)-H(4A)  | 130.6     |
| B(5A)-B(4A)-H(4A)  | 131.1     |
| C(1A)-B(5A)-B(9A)  | 109.60(8) |
| C(1A)-B(5A)-B(6A)  | 109.18(8) |
| B(9A)-B(5A)-B(6A)  | 61.93(7)  |
| C(1A)-B(5A)-B(4A)  | 55.47(6)  |
| B(9A)-B(5A)-B(4A)  | 59.72(7)  |
| B(6A)-B(5A)-B(4A)  | 102.83(8) |
| C(1A)-B(5A)-B(2A)  | 55.20(6)  |
| B(9A)-B(5A)-B(2A)  | 102.75(8) |
| B(6A)-B(5A)-B(2A)  | 59.39(6)  |
| B(4A)-B(5A)-B(2A)  | 90.07(7)  |
| C(1A)-B(5A)-H(5A)  | 121.3     |
| B(9A)-B(5A)-H(5A)  | 120.1     |
| B(6A)-B(5A)-H(5A)  | 120.3     |
| B(4A)-B(5A)-H(5A)  | 130.7     |
| B(2A)-B(5A)-H(5A)  | 131.0     |
| B(10A)-B(6A)-B(5A) | 111.29(8) |
| B(10A)-B(6A)-B(2A) | 111.81(9) |
| B(5A)-B(6A)-B(2A)  | 61.63(7)  |
| B(10A)-B(6A)-B(7A) | 56.98(7)  |
| B(5A)-B(6A)-B(7A)  | 102.07(8) |
| B(2A)-B(6A)-B(7A)  | 59.42(7)  |
| B(10A)-B(6A)-B(9A) | 56.83(7)  |
| B(5A)-B(6A)-B(9A)  | 59.02(6)  |
| B(2A)-B(6A)-B(9A)  | 102.28(8) |
| B(7A)-B(6A)-B(9A)  | 89.71(8)  |
| B(10A)-B(6A)-H(6A) | 118.9     |
| B(5A)-B(6A)-H(6A)  | 120.3     |
| B(2A)-B(6A)-H(6A)  | 119.9     |
| B(7A)-B(6A)-H(6A)  | 131.2     |
| B(9A)-B(6A)-H(6A)  | 131.3     |
| B(10A)-B(7A)-B(3A) | 111.83(9) |
| B(10A)-B(7A)-B(2A) | 111.55(9) |
| B(3A)-B(7A)-B(2A)  | 61.54(7)  |
| B(10A)-B(7A)-B(6A) | 57.01(7)  |

|                    |           |
|--------------------|-----------|
| B(3A)-B(7A)-B(6A)  | 102.22(8) |
| B(2A)-B(7A)-B(6A)  | 59.11(7)  |
| B(10A)-B(7A)-B(8A) | 57.28(7)  |
| B(3A)-B(7A)-B(8A)  | 59.26(7)  |
| B(2A)-B(7A)-B(8A)  | 102.29(8) |
| B(6A)-B(7A)-B(8A)  | 90.16(8)  |
| B(10A)-B(7A)-H(7A) | 118.7     |
| B(3A)-B(7A)-H(7A)  | 120.1     |
| B(2A)-B(7A)-H(7A)  | 120.2     |
| B(6A)-B(7A)-H(7A)  | 131.2     |
| B(8A)-B(7A)-H(7A)  | 131.0     |
| B(10A)-B(8A)-B(4A) | 111.54(9) |
| B(10A)-B(8A)-B(3A) | 111.13(9) |
| B(4A)-B(8A)-B(3A)  | 61.19(7)  |
| B(10A)-B(8A)-B(9A) | 56.79(7)  |
| B(4A)-B(8A)-B(9A)  | 59.60(7)  |
| B(3A)-B(8A)-B(9A)  | 102.13(8) |
| B(10A)-B(8A)-B(7A) | 56.72(7)  |
| B(4A)-B(8A)-B(7A)  | 101.86(8) |
| B(3A)-B(8A)-B(7A)  | 59.05(7)  |
| B(9A)-B(8A)-B(7A)  | 89.71(8)  |
| B(10A)-B(8A)-H(8A) | 119.1     |
| B(4A)-B(8A)-H(8A)  | 120.2     |
| B(3A)-B(8A)-H(8A)  | 120.4     |
| B(9A)-B(8A)-H(8A)  | 131.1     |
| B(7A)-B(8A)-H(8A)  | 131.4     |
| B(10A)-B(9A)-B(5A) | 111.50(9) |
| B(10A)-B(9A)-B(4A) | 111.67(9) |
| B(5A)-B(9A)-B(4A)  | 61.39(7)  |
| B(10A)-B(9A)-B(8A) | 57.51(7)  |
| B(5A)-B(9A)-B(8A)  | 102.27(8) |
| B(4A)-B(9A)-B(8A)  | 59.02(7)  |
| B(10A)-B(9A)-B(6A) | 57.03(7)  |
| B(5A)-B(9A)-B(6A)  | 59.05(6)  |
| B(4A)-B(9A)-B(6A)  | 101.98(8) |
| B(8A)-B(9A)-B(6A)  | 90.42(8)  |

|                     |            |
|---------------------|------------|
| B(10A)-B(9A)-Li(1)  | 68.42(7)   |
| B(5A)-B(9A)-Li(1)   | 171.32(9)  |
| B(4A)-B(9A)-Li(1)   | 127.10(8)  |
| B(8A)-B(9A)-Li(1)   | 85.08(8)   |
| B(6A)-B(9A)-Li(1)   | 116.90(8)  |
| B(10A)-B(9A)-H(9A)  | 118.7      |
| B(5A)-B(9A)-H(9A)   | 120.3      |
| B(4A)-B(9A)-H(9A)   | 120.4      |
| B(8A)-B(9A)-H(9A)   | 130.8      |
| B(6A)-B(9A)-H(9A)   | 131.1      |
| Li(1)-B(9A)-H(9A)   | 55.4       |
| B(9A)-B(10A)-B(7A)  | 100.62(9)  |
| B(9A)-B(10A)-B(6A)  | 66.13(7)   |
| B(7A)-B(10A)-B(6A)  | 66.02(7)   |
| B(9A)-B(10A)-B(8A)  | 65.70(8)   |
| B(7A)-B(10A)-B(8A)  | 66.00(8)   |
| B(6A)-B(10A)-B(8A)  | 100.73(8)  |
| B(9A)-B(10A)-Li(1)  | 74.74(8)   |
| B(7A)-B(10A)-Li(1)  | 155.78(10) |
| B(6A)-B(10A)-Li(1)  | 129.16(9)  |
| B(8A)-B(10A)-Li(1)  | 90.97(8)   |
| B(9A)-B(10A)-H(10A) | 148.7      |
| B(7A)-B(10A)-H(10A) | 108.8      |
| B(6A)-B(10A)-H(10A) | 116.6      |
| B(8A)-B(10A)-H(10A) | 136.7      |
| Li(1)-B(10A)-H(10A) | 82.3       |
| C(3A)-C(2A)-C(4A)   | 111.62(9)  |
| C(3A)-C(2A)-P(1A)   | 111.60(8)  |
| C(4A)-C(2A)-P(1A)   | 115.04(8)  |
| C(3A)-C(2A)-H(2C)   | 105.9      |
| C(4A)-C(2A)-H(2C)   | 105.9      |
| P(1A)-C(2A)-H(2C)   | 105.9      |
| C(2A)-C(3A)-H(3C)   | 109.5      |
| C(2A)-C(3A)-H(3D)   | 109.5      |
| H(3C)-C(3A)-H(3D)   | 109.5      |
| C(2A)-C(3A)-H(3E)   | 109.5      |

|                   |            |
|-------------------|------------|
| H(3C)-C(3A)-H(3E) | 109.5      |
| H(3D)-C(3A)-H(3E) | 109.5      |
| C(2A)-C(4A)-H(4C) | 109.5      |
| C(2A)-C(4A)-H(4D) | 109.5      |
| H(4C)-C(4A)-H(4D) | 109.5      |
| C(2A)-C(4A)-H(4E) | 109.5      |
| H(4C)-C(4A)-H(4E) | 109.5      |
| H(4D)-C(4A)-H(4E) | 109.5      |
| C(7A)-C(5A)-C(6A) | 109.66(10) |
| C(7A)-C(5A)-P(1A) | 114.87(8)  |
| C(6A)-C(5A)-P(1A) | 108.76(7)  |
| C(7A)-C(5A)-H(5C) | 107.8      |
| C(6A)-C(5A)-H(5C) | 107.8      |
| P(1A)-C(5A)-H(5C) | 107.8      |
| C(5A)-C(6A)-H(6C) | 109.5      |
| C(5A)-C(6A)-H(6D) | 109.5      |
| H(6C)-C(6A)-H(6D) | 109.5      |
| C(5A)-C(6A)-H(6E) | 109.5      |
| H(6C)-C(6A)-H(6E) | 109.5      |
| H(6D)-C(6A)-H(6E) | 109.5      |
| C(5A)-C(7A)-H(7C) | 109.5      |
| C(5A)-C(7A)-H(7D) | 109.5      |
| H(7C)-C(7A)-H(7D) | 109.5      |
| C(5A)-C(7A)-H(7E) | 109.5      |
| H(7C)-C(7A)-H(7E) | 109.5      |
| H(7D)-C(7A)-H(7E) | 109.5      |
| B(5A)-C(1A)-B(2A) | 69.65(7)   |
| B(5A)-C(1A)-B(4A) | 69.37(7)   |
| B(2A)-C(1A)-B(4A) | 107.38(8)  |
| B(5A)-C(1A)-B(3A) | 106.85(8)  |
| B(2A)-C(1A)-B(3A) | 69.50(7)   |
| B(4A)-C(1A)-B(3A) | 68.84(7)   |
| B(5A)-C(1A)-P(1A) | 122.16(7)  |
| B(2A)-C(1A)-P(1A) | 127.78(7)  |
| B(4A)-C(1A)-P(1A) | 124.62(7)  |
| B(3A)-C(1A)-P(1A) | 130.93(8)  |



|                   |           |
|-------------------|-----------|
| C(1B)-P(1B)-C(5B) | 104.34(5) |
| C(1B)-P(1B)-C(2B) | 109.18(5) |
| C(5B)-P(1B)-C(2B) | 105.36(5) |
| C(1B)-P(1B)-Rh(1) | 111.47(3) |
| C(5B)-P(1B)-Rh(1) | 111.39(4) |
| C(2B)-P(1B)-Rh(1) | 114.45(4) |
| B(4B)-C(1B)-B(5B) | 70.41(7)  |
| B(4B)-C(1B)-B(3B) | 69.60(7)  |
| B(5B)-C(1B)-B(3B) | 107.02(8) |
| B(4B)-C(1B)-B(2B) | 107.20(8) |
| B(5B)-C(1B)-B(2B) | 68.63(7)  |
| B(3B)-C(1B)-B(2B) | 68.73(7)  |
| B(4B)-C(1B)-P(1B) | 128.57(7) |
| B(5B)-C(1B)-P(1B) | 124.08(7) |
| B(3B)-C(1B)-P(1B) | 128.74(7) |
| B(2B)-C(1B)-P(1B) | 124.18(7) |
| C(1B)-B(2B)-B(7B) | 109.00(9) |
| C(1B)-B(2B)-B(6B) | 108.72(8) |
| B(7B)-B(2B)-B(6B) | 61.28(7)  |
| C(1B)-B(2B)-B(5B) | 55.30(6)  |
| B(7B)-B(2B)-B(5B) | 102.28(8) |
| B(6B)-B(2B)-B(5B) | 59.20(7)  |
| C(1B)-B(2B)-B(3B) | 55.50(6)  |
| B(7B)-B(2B)-B(3B) | 59.46(7)  |
| B(6B)-B(2B)-B(3B) | 102.44(8) |
| B(5B)-B(2B)-B(3B) | 90.54(7)  |
| C(1B)-B(2B)-H(2B) | 121.5     |
| B(7B)-B(2B)-H(2B) | 120.6     |
| B(6B)-B(2B)-H(2B) | 120.8     |
| B(5B)-B(2B)-H(2B) | 130.8     |
| B(3B)-B(2B)-H(2B) | 130.5     |
| C(1B)-B(3B)-B(7B) | 108.94(9) |
| C(1B)-B(3B)-B(8B) | 108.45(9) |
| B(7B)-B(3B)-B(8B) | 61.39(7)  |
| C(1B)-B(3B)-B(2B) | 55.77(6)  |
| B(7B)-B(3B)-B(2B) | 59.14(7)  |

|                   |           |
|-------------------|-----------|
| B(8B)-B(3B)-B(2B) | 102.18(8) |
| C(1B)-B(3B)-B(4B) | 54.95(6)  |
| B(7B)-B(3B)-B(4B) | 102.10(8) |
| B(8B)-B(3B)-B(4B) | 59.12(7)  |
| B(2B)-B(3B)-B(4B) | 90.23(7)  |
| C(1B)-B(3B)-H(3B) | 121.6     |
| B(7B)-B(3B)-H(3B) | 120.7     |
| B(8B)-B(3B)-H(3B) | 120.9     |
| B(2B)-B(3B)-H(3B) | 130.7     |
| B(4B)-B(3B)-H(3B) | 131.0     |
| C(1B)-B(4B)-B(8B) | 109.13(8) |
| C(1B)-B(4B)-B(9B) | 108.46(8) |
| B(8B)-B(4B)-B(9B) | 61.45(7)  |
| C(1B)-B(4B)-B(3B) | 55.45(6)  |
| B(8B)-B(4B)-B(3B) | 59.38(7)  |
| B(9B)-B(4B)-B(3B) | 101.94(8) |
| C(1B)-B(4B)-B(5B) | 54.80(6)  |
| B(8B)-B(4B)-B(5B) | 101.64(8) |
| B(9B)-B(4B)-B(5B) | 58.91(7)  |
| B(3B)-B(4B)-B(5B) | 89.16(7)  |
| C(1B)-B(4B)-H(4B) | 121.5     |
| B(8B)-B(4B)-H(4B) | 120.6     |
| B(9B)-B(4B)-H(4B) | 120.9     |
| B(3B)-B(4B)-H(4B) | 131.1     |
| B(5B)-B(4B)-H(4B) | 131.7     |
| C(1B)-B(5B)-B(6B) | 109.84(9) |
| C(1B)-B(5B)-B(9B) | 108.55(8) |
| B(6B)-B(5B)-B(9B) | 61.52(7)  |
| C(1B)-B(5B)-B(2B) | 56.07(6)  |
| B(6B)-B(5B)-B(2B) | 59.69(7)  |
| B(9B)-B(5B)-B(2B) | 102.45(8) |
| C(1B)-B(5B)-B(4B) | 54.79(6)  |
| B(6B)-B(5B)-B(4B) | 102.26(8) |
| B(9B)-B(5B)-B(4B) | 59.03(7)  |
| B(2B)-B(5B)-B(4B) | 90.06(7)  |
| C(1B)-B(5B)-H(5B) | 121.3     |

|                    |           |
|--------------------|-----------|
| B(6B)-B(5B)-H(5B)  | 120.2     |
| B(9B)-B(5B)-H(5B)  | 120.8     |
| B(2B)-B(5B)-H(5B)  | 130.5     |
| B(4B)-B(5B)-H(5B)  | 131.3     |
| B(10B)-B(6B)-B(5B) | 112.38(9) |
| B(10B)-B(6B)-B(2B) | 112.20(9) |
| B(5B)-B(6B)-B(2B)  | 61.11(7)  |
| B(10B)-B(6B)-B(7B) | 57.59(8)  |
| B(5B)-B(6B)-B(7B)  | 102.13(8) |
| B(2B)-B(6B)-B(7B)  | 59.16(7)  |
| B(10B)-B(6B)-B(9B) | 57.32(7)  |
| B(5B)-B(6B)-B(9B)  | 59.52(7)  |
| B(2B)-B(6B)-B(9B)  | 102.05(8) |
| B(7B)-B(6B)-B(9B)  | 90.07(8)  |
| B(10B)-B(6B)-H(6B) | 118.1     |
| B(5B)-B(6B)-H(6B)  | 120.1     |
| B(2B)-B(6B)-H(6B)  | 120.3     |
| B(7B)-B(6B)-H(6B)  | 131.1     |
| B(9B)-B(6B)-H(6B)  | 131.1     |
| B(10B)-B(7B)-B(2B) | 112.26(9) |
| B(10B)-B(7B)-B(3B) | 112.36(9) |
| B(2B)-B(7B)-B(3B)  | 61.40(7)  |
| B(10B)-B(7B)-B(6B) | 57.25(7)  |
| B(2B)-B(7B)-B(6B)  | 59.56(7)  |
| B(3B)-B(7B)-B(6B)  | 102.59(8) |
| B(10B)-B(7B)-B(8B) | 57.37(7)  |
| B(2B)-B(7B)-B(8B)  | 102.46(8) |
| B(3B)-B(7B)-B(8B)  | 59.52(7)  |
| B(6B)-B(7B)-B(8B)  | 90.28(8)  |
| B(10B)-B(7B)-H(7B) | 118.3     |
| B(2B)-B(7B)-H(7B)  | 120.0     |
| B(3B)-B(7B)-H(7B)  | 119.9     |
| B(6B)-B(7B)-H(7B)  | 131.0     |
| B(8B)-B(7B)-H(7B)  | 131.0     |
| B(10B)-B(8B)-B(4B) | 112.04(9) |
| B(10B)-B(8B)-B(3B) | 111.86(9) |

|                     |           |
|---------------------|-----------|
| B(4B)-B(8B)-B(3B)   | 61.50(7)  |
| B(10B)-B(8B)-B(7B)  | 57.27(7)  |
| B(4B)-B(8B)-B(7B)   | 102.15(8) |
| B(3B)-B(8B)-B(7B)   | 59.09(7)  |
| B(10B)-B(8B)-B(9B)  | 57.09(7)  |
| B(4B)-B(8B)-B(9B)   | 59.32(7)  |
| B(3B)-B(8B)-B(9B)   | 101.94(8) |
| B(7B)-B(8B)-B(9B)   | 89.62(8)  |
| B(10B)-B(8B)-H(8B)  | 118.5     |
| B(4B)-B(8B)-H(8B)   | 120.0     |
| B(3B)-B(8B)-H(8B)   | 120.2     |
| B(7B)-B(8B)-H(8B)   | 131.3     |
| B(9B)-B(8B)-H(8B)   | 131.4     |
| B(10B)-B(9B)-B(5B)  | 111.73(9) |
| B(10B)-B(9B)-B(4B)  | 112.23(9) |
| B(5B)-B(9B)-B(4B)   | 62.06(7)  |
| B(10B)-B(9B)-B(6B)  | 57.18(7)  |
| B(5B)-B(9B)-B(6B)   | 58.96(7)  |
| B(4B)-B(9B)-B(6B)   | 102.60(8) |
| B(10B)-B(9B)-B(8B)  | 57.40(7)  |
| B(5B)-B(9B)-B(8B)   | 102.29(8) |
| B(4B)-B(9B)-B(8B)   | 59.23(7)  |
| B(6B)-B(9B)-B(8B)   | 90.03(8)  |
| B(10B)-B(9B)-H(9B)  | 118.5     |
| B(5B)-B(9B)-H(9B)   | 120.1     |
| B(4B)-B(9B)-H(9B)   | 119.7     |
| B(6B)-B(9B)-H(9B)   | 131.2     |
| B(8B)-B(9B)-H(9B)   | 131.2     |
| B(6B)-B(10B)-B(9B)  | 65.50(8)  |
| B(6B)-B(10B)-B(7B)  | 65.16(8)  |
| B(9B)-B(10B)-B(7B)  | 99.41(9)  |
| B(6B)-B(10B)-B(8B)  | 99.80(9)  |
| B(9B)-B(10B)-B(8B)  | 65.51(8)  |
| B(7B)-B(10B)-B(8B)  | 65.36(8)  |
| B(6B)-B(10B)-H(10B) | 130.1     |
| B(9B)-B(10B)-H(10B) | 130.2     |

|                     |            |
|---------------------|------------|
| B(7B)-B(10B)-H(10B) | 130.4      |
| B(8B)-B(10B)-H(10B) | 130.0      |
| C(3B)-C(2B)-C(4B)   | 109.11(10) |
| C(3B)-C(2B)-P(1B)   | 116.20(8)  |
| C(4B)-C(2B)-P(1B)   | 109.39(8)  |
| C(3B)-C(2B)-H(2D)   | 107.3      |
| C(4B)-C(2B)-H(2D)   | 107.3      |
| P(1B)-C(2B)-H(2D)   | 107.3      |
| C(2B)-C(3B)-H(3F)   | 109.5      |
| C(2B)-C(3B)-H(3G)   | 109.5      |
| H(3F)-C(3B)-H(3G)   | 109.5      |
| C(2B)-C(3B)-H(3H)   | 109.5      |
| H(3F)-C(3B)-H(3H)   | 109.5      |
| H(3G)-C(3B)-H(3H)   | 109.5      |
| C(2B)-C(4B)-H(4F)   | 109.5      |
| C(2B)-C(4B)-H(4G)   | 109.5      |
| H(4F)-C(4B)-H(4G)   | 109.5      |
| C(2B)-C(4B)-H(4H)   | 109.5      |
| H(4F)-C(4B)-H(4H)   | 109.5      |
| H(4G)-C(4B)-H(4H)   | 109.5      |
| C(6B)-C(5B)-C(7B)   | 110.32(10) |
| C(6B)-C(5B)-P(1B)   | 114.62(8)  |
| C(7B)-C(5B)-P(1B)   | 113.34(8)  |
| C(6B)-C(5B)-H(5D)   | 105.9      |
| C(7B)-C(5B)-H(5D)   | 105.9      |
| P(1B)-C(5B)-H(5D)   | 105.9      |
| C(5B)-C(6B)-H(6F)   | 109.5      |
| C(5B)-C(6B)-H(6G)   | 109.5      |
| H(6F)-C(6B)-H(6G)   | 109.5      |
| C(5B)-C(6B)-H(6H)   | 109.5      |
| H(6F)-C(6B)-H(6H)   | 109.5      |
| H(6G)-C(6B)-H(6H)   | 109.5      |
| C(5B)-C(7B)-H(7F)   | 109.5      |
| C(5B)-C(7B)-H(7G)   | 109.5      |
| H(7F)-C(7B)-H(7G)   | 109.5      |
| C(5B)-C(7B)-H(7H)   | 109.5      |

|                    |            |
|--------------------|------------|
| H(7F)-C(7B)-H(7H)  | 109.5      |
| H(7G)-C(7B)-H(7H)  | 109.5      |
| O(2T)-Li(1)-O(1T)  | 120.10(13) |
| O(2T)-Li(1)-B(10A) | 103.17(10) |
| O(1T)-Li(1)-B(10A) | 125.96(12) |
| O(2T)-Li(1)-B(9A)  | 99.34(10)  |
| O(1T)-Li(1)-B(9A)  | 101.31(11) |
| B(10A)-Li(1)-B(9A) | 36.84(5)   |
| C(1T)-O(1T)-C(4T)  | 105.95(9)  |
| C(1T)-O(1T)-Li(1)  | 126.88(10) |
| C(4T)-O(1T)-Li(1)  | 124.10(11) |
| O(1T)-C(1T)-C(2T)  | 104.62(10) |
| O(1T)-C(1T)-H(1A)  | 110.8      |
| C(2T)-C(1T)-H(1A)  | 110.8      |
| O(1T)-C(1T)-H(1B)  | 110.8      |
| C(2T)-C(1T)-H(1B)  | 110.8      |
| H(1A)-C(1T)-H(1B)  | 108.9      |
| C(1T)-C(2T)-C(3T)  | 103.42(11) |
| C(1T)-C(2T)-H(2E)  | 111.1      |
| C(3T)-C(2T)-H(2E)  | 111.1      |
| C(1T)-C(2T)-H(2F)  | 111.1      |
| C(3T)-C(2T)-H(2F)  | 111.1      |
| H(2E)-C(2T)-H(2F)  | 109.0      |
| C(2T)-C(3T)-C(4T)  | 105.39(11) |
| C(2T)-C(3T)-H(3I)  | 110.7      |
| C(4T)-C(3T)-H(3I)  | 110.7      |
| C(2T)-C(3T)-H(3J)  | 110.7      |
| C(4T)-C(3T)-H(3J)  | 110.7      |
| H(3I)-C(3T)-H(3J)  | 108.8      |
| O(1T)-C(4T)-C(3T)  | 105.99(10) |
| O(1T)-C(4T)-H(4I)  | 110.5      |
| C(3T)-C(4T)-H(4I)  | 110.5      |
| O(1T)-C(4T)-H(4J)  | 110.5      |
| C(3T)-C(4T)-H(4J)  | 110.5      |
| H(4I)-C(4T)-H(4J)  | 108.7      |
| C(8T)-O(2T)-C(5T)  | 109.58(9)  |

|                   |            |
|-------------------|------------|
| C(8T)-O(2T)-Li(1) | 122.27(10) |
| C(5T)-O(2T)-Li(1) | 126.98(11) |
| O(2T)-C(5T)-C(6T) | 105.92(10) |
| O(2T)-C(5T)-H(5E) | 110.6      |
| C(6T)-C(5T)-H(5E) | 110.6      |
| O(2T)-C(5T)-H(5F) | 110.6      |
| C(6T)-C(5T)-H(5F) | 110.6      |
| H(5E)-C(5T)-H(5F) | 108.7      |
| C(5T)-C(6T)-C(7T) | 102.71(11) |
| C(5T)-C(6T)-H(6I) | 111.2      |
| C(7T)-C(6T)-H(6I) | 111.2      |
| C(5T)-C(6T)-H(6J) | 111.2      |
| C(7T)-C(6T)-H(6J) | 111.2      |
| H(6I)-C(6T)-H(6J) | 109.1      |
| C(8T)-C(7T)-C(6T) | 102.28(11) |
| C(8T)-C(7T)-H(7I) | 111.3      |
| C(6T)-C(7T)-H(7I) | 111.3      |
| C(8T)-C(7T)-H(7J) | 111.3      |
| C(6T)-C(7T)-H(7J) | 111.3      |
| H(7I)-C(7T)-H(7J) | 109.2      |
| O(2T)-C(8T)-C(7T) | 105.19(10) |
| O(2T)-C(8T)-H(8C) | 110.7      |
| C(7T)-C(8T)-H(8C) | 110.7      |
| O(2T)-C(8T)-H(8D) | 110.7      |
| C(7T)-C(8T)-H(8D) | 110.7      |
| H(8C)-C(8T)-H(8D) | 108.8      |
| C(6S)-C(1S)-C(2S) | 120.25(14) |
| C(6S)-C(1S)-H(1S) | 119.9      |
| C(2S)-C(1S)-H(1S) | 119.9      |
| C(3S)-C(2S)-C(1S) | 120.24(15) |
| C(3S)-C(2S)-H(2S) | 119.9      |
| C(1S)-C(2S)-H(2S) | 119.9      |
| C(4S)-C(3S)-C(2S) | 119.81(15) |
| C(4S)-C(3S)-H(3S) | 120.1      |
| C(2S)-C(3S)-H(3S) | 120.1      |
| C(3S)-C(4S)-C(5S) | 120.17(17) |

|                   |            |
|-------------------|------------|
| C(3S)-C(4S)-H(4S) | 119.9      |
| C(5S)-C(4S)-H(4S) | 119.9      |
| C(6S)-C(5S)-C(4S) | 119.97(17) |
| C(6S)-C(5S)-H(5S) | 120.0      |
| C(4S)-C(5S)-H(5S) | 120.0      |
| C(1S)-C(6S)-C(5S) | 119.56(15) |
| C(1S)-C(6S)-H(6S) | 120.2      |
| C(5S)-C(6S)-H(6S) | 120.2      |

---

Symmetry transformations used to generate equivalent atoms:



Table 4. Anisotropic displacement parameters ( $\text{\AA}^2 \times 10^3$ ) for vL139JE\_0m. The anisotropic displacement factor exponent takes the form:  $-2\pi^2 [ h^2 a^{*2} U^{11} + \dots + 2 h k a^* b^* U^{12} ]$

|        | U <sup>11</sup> | U <sup>22</sup> | U <sup>33</sup> | U <sup>23</sup> | U <sup>13</sup> | U <sup>12</sup> |
|--------|-----------------|-----------------|-----------------|-----------------|-----------------|-----------------|
| Rh(1)  | 15(1)           | 10(1)           | 9(1)            | -1(1)           | -3(1)           | -1(1)           |
| C(1)   | 22(1)           | 17(1)           | 12(1)           | -4(1)           | -4(1)           | -2(1)           |
| O(1)   | 42(1)           | 15(1)           | 20(1)           | 0(1)            | -8(1)           | -5(1)           |
| C(2)   | 36(1)           | 20(1)           | 12(1)           | -4(1)           | -8(1)           | 4(1)            |
| O(2)   | 66(1)           | 28(1)           | 24(1)           | -10(1)          | -21(1)          | 23(1)           |
| P(1A)  | 13(1)           | 11(1)           | 10(1)           | 0(1)            | -2(1)           | -1(1)           |
| B(2A)  | 17(1)           | 16(1)           | 11(1)           | -1(1)           | -3(1)           | -4(1)           |
| B(3A)  | 16(1)           | 17(1)           | 14(1)           | -1(1)           | -1(1)           | -2(1)           |
| B(4A)  | 16(1)           | 18(1)           | 13(1)           | -1(1)           | -3(1)           | -5(1)           |
| B(5A)  | 15(1)           | 13(1)           | 12(1)           | -1(1)           | -2(1)           | -2(1)           |
| B(6A)  | 17(1)           | 16(1)           | 12(1)           | 0(1)            | -2(1)           | -3(1)           |
| B(7A)  | 19(1)           | 17(1)           | 12(1)           | -1(1)           | 0(1)            | -3(1)           |
| B(8A)  | 16(1)           | 20(1)           | 16(1)           | -1(1)           | -1(1)           | -5(1)           |
| B(9A)  | 19(1)           | 16(1)           | 14(1)           | -1(1)           | -2(1)           | -5(1)           |
| B(10A) | 19(1)           | 18(1)           | 13(1)           | 0(1)            | 0(1)            | -6(1)           |
| C(2A)  | 19(1)           | 12(1)           | 14(1)           | -1(1)           | -1(1)           | 0(1)            |
| C(3A)  | 18(1)           | 22(1)           | 20(1)           | -2(1)           | -4(1)           | 4(1)            |
| C(4A)  | 30(1)           | 17(1)           | 18(1)           | -6(1)           | 0(1)            | -3(1)           |
| C(5A)  | 15(1)           | 17(1)           | 16(1)           | 0(1)            | -4(1)           | -5(1)           |
| C(6A)  | 20(1)           | 22(1)           | 25(1)           | 5(1)            | -2(1)           | -8(1)           |
| C(7A)  | 15(1)           | 22(1)           | 45(1)           | 4(1)            | -9(1)           | -3(1)           |
| C(1A)  | 14(1)           | 13(1)           | 10(1)           | -1(1)           | -2(1)           | -2(1)           |
| P(1B)  | 15(1)           | 11(1)           | 10(1)           | -1(1)           | -2(1)           | -3(1)           |
| C(1B)  | 14(1)           | 11(1)           | 12(1)           | -1(1)           | -3(1)           | -2(1)           |
| B(2B)  | 16(1)           | 18(1)           | 16(1)           | -1(1)           | -5(1)           | -4(1)           |
| B(3B)  | 16(1)           | 13(1)           | 18(1)           | -2(1)           | -3(1)           | -1(1)           |
| B(4B)  | 18(1)           | 15(1)           | 12(1)           | -2(1)           | -4(1)           | -3(1)           |
| B(5B)  | 17(1)           | 13(1)           | 14(1)           | -1(1)           | -3(1)           | -4(1)           |
| B(6B)  | 17(1)           | 19(1)           | 18(1)           | -2(1)           | -2(1)           | -6(1)           |
| B(7B)  | 15(1)           | 19(1)           | 24(1)           | -3(1)           | -2(1)           | -2(1)           |
| B(8B)  | 20(1)           | 20(1)           | 17(1)           | -6(1)           | 0(1)            | -4(1)           |

|        |       |       |       |        |        |        |
|--------|-------|-------|-------|--------|--------|--------|
| B(9B)  | 21(1) | 19(1) | 13(1) | -1(1)  | -1(1)  | -6(1)  |
| B(10B) | 20(1) | 24(1) | 21(1) | -5(1)  | 2(1)   | -6(1)  |
| C(2B)  | 15(1) | 17(1) | 17(1) | -2(1)  | -5(1)  | -3(1)  |
| C(3B)  | 19(1) | 18(1) | 30(1) | 2(1)   | -10(1) | -1(1)  |
| C(4B)  | 17(1) | 43(1) | 25(1) | -6(1)  | -2(1)  | 0(1)   |
| C(5B)  | 24(1) | 12(1) | 16(1) | -2(1)  | 0(1)   | -6(1)  |
| C(6B)  | 25(1) | 18(1) | 24(1) | -5(1)  | -6(1)  | -8(1)  |
| C(7B)  | 54(1) | 23(1) | 27(1) | -7(1)  | 16(1)  | -21(1) |
| Li(1)  | 25(1) | 35(1) | 30(1) | -12(1) | -10(1) | 4(1)   |
| O(1T)  | 16(1) | 32(1) | 16(1) | -2(1)  | -2(1)  | -2(1)  |
| C(1T)  | 16(1) | 50(1) | 20(1) | 0(1)   | -2(1)  | -2(1)  |
| C(2T)  | 25(1) | 35(1) | 36(1) | -2(1)  | -12(1) | -7(1)  |
| C(3T)  | 25(1) | 86(1) | 21(1) | -14(1) | -6(1)  | -5(1)  |
| C(4T)  | 23(1) | 42(1) | 16(1) | -6(1)  | 1(1)   | -7(1)  |
| O(2T)  | 17(1) | 23(1) | 26(1) | -7(1)  | -6(1)  | -1(1)  |
| C(5T)  | 19(1) | 32(1) | 37(1) | -12(1) | -10(1) | -1(1)  |
| C(6T)  | 28(1) | 36(1) | 31(1) | -7(1)  | -11(1) | 6(1)   |
| C(7T)  | 33(1) | 36(1) | 36(1) | -16(1) | -9(1)  | 9(1)   |
| C(8T)  | 27(1) | 26(1) | 40(1) | -13(1) | -11(1) | -2(1)  |
| C(1S)  | 28(1) | 34(1) | 35(1) | -9(1)  | -4(1)  | -5(1)  |
| C(2S)  | 28(1) | 37(1) | 29(1) | -9(1)  | -2(1)  | 1(1)   |
| C(3S)  | 33(1) | 39(1) | 49(1) | -19(1) | -12(1) | 0(1)   |
| C(4S)  | 61(1) | 32(1) | 73(1) | -5(1)  | -13(1) | -15(1) |
| C(5S)  | 73(1) | 39(1) | 46(1) | 10(1)  | -11(1) | -4(1)  |
| C(6S)  | 44(1) | 41(1) | 35(1) | -9(1)  | -15(1) | 4(1)   |

---

Table 5. Hydrogen coordinates ( $\times 10^4$ ) and isotropic displacement parameters ( $\text{\AA}^2 \times 10^{-3}$ ) for vL139JE\_0m.

|        | x     | y    | z    | U(eq) |
|--------|-------|------|------|-------|
| H(2A)  | 714   | 2337 | 933  | 17    |
| H(3A)  | 4459  | 1794 | 1255 | 19    |
| H(4A)  | 3821  | 3266 | 2455 | 18    |
| H(5A)  | 92    | 3833 | 2129 | 17    |
| H(6A)  | 415   | 4347 | 528  | 18    |
| H(7A)  | 3532  | 2915 | -95  | 19    |
| H(8A)  | 5724  | 3583 | 991  | 21    |
| H(9A)  | 2621  | 5017 | 1605 | 19    |
| H(10A) | 3493  | 4671 | -88  | 20    |
| H(2C)  | 2046  | 142  | 2967 | 19    |
| H(3C)  | 4794  | -48  | 2748 | 31    |
| H(3D)  | 4240  | 828  | 3171 | 31    |
| H(3E)  | 4839  | 966  | 2304 | 31    |
| H(4C)  | 2945  | 672  | 1430 | 32    |
| H(4D)  | 1393  | 190  | 1797 | 32    |
| H(4E)  | 3136  | -364 | 1837 | 32    |
| H(5C)  | -596  | 1288 | 2080 | 19    |
| H(6C)  | -1341 | 1010 | 3651 | 34    |
| H(6D)  | -594  | 226  | 3150 | 34    |
| H(6E)  | -2387 | 706  | 3117 | 34    |
| H(7C)  | -2969 | 2232 | 2506 | 42    |
| H(7D)  | -1593 | 2833 | 2093 | 42    |
| H(7E)  | -1966 | 2688 | 2971 | 42    |
| H(2B)  | -1715 | 2671 | 4914 | 19    |
| H(3B)  | -527  | 4220 | 5714 | 19    |
| H(4B)  | 1580  | 2568 | 6701 | 18    |
| H(5B)  | 353   | 1012 | 5879 | 17    |
| H(6B)  | -3133 | 1403 | 6156 | 21    |
| H(7B)  | -3763 | 3670 | 6032 | 23    |
| H(8B)  | -1435 | 3603 | 7299 | 23    |

|        |       |       |      |    |
|--------|-------|-------|------|----|
| H(9B)  | -785  | 1325  | 7414 | 21 |
| H(10B) | -3990 | 2407  | 7441 | 26 |
| H(2D)  | 4332  | 2423  | 5511 | 20 |
| H(3F)  | 3314  | 697   | 5438 | 33 |
| H(3G)  | 2934  | 1220  | 6146 | 33 |
| H(3H)  | 4734  | 822   | 5859 | 33 |
| H(4F)  | 6265  | 1594  | 4749 | 43 |
| H(4G)  | 5408  | 2431  | 4244 | 43 |
| H(4H)  | 4957  | 1414  | 4286 | 43 |
| H(5D)  | 1455  | 4257  | 4600 | 21 |
| H(6F)  | 4082  | 3977  | 5396 | 32 |
| H(6G)  | 2259  | 4064  | 5785 | 32 |
| H(6H)  | 2929  | 4915  | 5240 | 32 |
| H(7F)  | 3580  | 4786  | 3839 | 53 |
| H(7G)  | 3435  | 3823  | 3590 | 53 |
| H(7H)  | 4771  | 3893  | 4078 | 53 |
| H(1A)  | 8022  | 5882  | 936  | 35 |
| H(1B)  | 8011  | 4869  | 1398 | 35 |
| H(2E)  | 8040  | 6552  | 1954 | 37 |
| H(2F)  | 9055  | 5572  | 2178 | 37 |
| H(3I)  | 6266  | 6163  | 2940 | 52 |
| H(3J)  | 7038  | 5102  | 3012 | 52 |
| H(4I)  | 5242  | 4743  | 2404 | 33 |
| H(4J)  | 4324  | 5765  | 2443 | 33 |
| H(5E)  | 852   | 6176  | 673  | 34 |
| H(5F)  | 1648  | 6554  | -145 | 34 |
| H(6I)  | -653  | 7561  | 566  | 38 |
| H(6J)  | 717   | 8034  | -12  | 38 |
| H(7I)  | 998   | 8570  | 1049 | 42 |
| H(7J)  | 614   | 7617  | 1555 | 42 |
| H(8C)  | 3503  | 7960  | 588  | 35 |
| H(8D)  | 3345  | 7398  | 1405 | 35 |
| H(1S)  | 5910  | 8051  | 1258 | 38 |
| H(2S)  | 7033  | 8428  | 2206 | 38 |
| H(3S)  | 8357  | 9728  | 2021 | 46 |
| H(4S)  | 8546  | 10651 | 891  | 65 |

|       |      |       |     |    |
|-------|------|-------|-----|----|
| H(5S) | 7404 | 10282 | -64 | 65 |
| H(6S) | 6087 | 8977  | 121 | 48 |

---

Table 6. Torsion angles [ $^{\circ}$ ] for vL139JE\_0m.

---

|                         |            |
|-------------------------|------------|
| B(6A)-B(2A)-B(3A)-C(1A) | 104.56(9)  |
| B(7A)-B(2A)-B(3A)-C(1A) | 150.26(9)  |
| B(5A)-B(2A)-B(3A)-C(1A) | 46.46(7)   |
| C(1A)-B(2A)-B(3A)-B(7A) | -150.26(9) |
| B(6A)-B(2A)-B(3A)-B(7A) | -45.70(7)  |
| B(5A)-B(2A)-B(3A)-B(7A) | -103.80(8) |
| C(1A)-B(2A)-B(3A)-B(8A) | -104.33(9) |
| B(6A)-B(2A)-B(3A)-B(8A) | 0.23(9)    |
| B(7A)-B(2A)-B(3A)-B(8A) | 45.93(8)   |
| B(5A)-B(2A)-B(3A)-B(8A) | -57.87(8)  |
| C(1A)-B(2A)-B(3A)-B(4A) | -45.96(7)  |
| B(6A)-B(2A)-B(3A)-B(4A) | 58.60(8)   |
| B(7A)-B(2A)-B(3A)-B(4A) | 104.31(8)  |
| B(5A)-B(2A)-B(3A)-B(4A) | 0.50(7)    |
| B(7A)-B(3A)-B(4A)-C(1A) | 104.23(9)  |
| B(8A)-B(3A)-B(4A)-C(1A) | 150.17(9)  |
| B(2A)-B(3A)-B(4A)-C(1A) | 45.63(7)   |
| C(1A)-B(3A)-B(4A)-B(8A) | -150.17(9) |
| B(7A)-B(3A)-B(4A)-B(8A) | -45.94(8)  |
| B(2A)-B(3A)-B(4A)-B(8A) | -104.54(8) |
| C(1A)-B(3A)-B(4A)-B(9A) | -104.26(9) |
| B(7A)-B(3A)-B(4A)-B(9A) | -0.04(9)   |
| B(8A)-B(3A)-B(4A)-B(9A) | 45.90(8)   |
| B(2A)-B(3A)-B(4A)-B(9A) | -58.63(8)  |
| C(1A)-B(3A)-B(4A)-B(5A) | -46.13(7)  |
| B(7A)-B(3A)-B(4A)-B(5A) | 58.09(8)   |
| B(8A)-B(3A)-B(4A)-B(5A) | 104.03(8)  |
| B(2A)-B(3A)-B(4A)-B(5A) | -0.50(7)   |
| B(8A)-B(4A)-B(5A)-C(1A) | 105.47(9)  |
| B(9A)-B(4A)-B(5A)-C(1A) | 150.84(9)  |
| B(3A)-B(4A)-B(5A)-C(1A) | 46.58(7)   |
| C(1A)-B(4A)-B(5A)-B(9A) | -150.84(9) |
| B(8A)-B(4A)-B(5A)-B(9A) | -45.37(8)  |
| B(3A)-B(4A)-B(5A)-B(9A) | -104.26(8) |

|                          |             |
|--------------------------|-------------|
| C(1A)-B(4A)-B(5A)-B(6A)  | -104.62(9)  |
| B(8A)-B(4A)-B(5A)-B(6A)  | 0.85(10)    |
| B(9A)-B(4A)-B(5A)-B(6A)  | 46.22(8)    |
| B(3A)-B(4A)-B(5A)-B(6A)  | -58.03(8)   |
| C(1A)-B(4A)-B(5A)-B(2A)  | -46.08(7)   |
| B(8A)-B(4A)-B(5A)-B(2A)  | 59.39(8)    |
| B(9A)-B(4A)-B(5A)-B(2A)  | 104.76(8)   |
| B(3A)-B(4A)-B(5A)-B(2A)  | 0.50(7)     |
| B(6A)-B(2A)-B(5A)-C(1A)  | -151.18(9)  |
| B(7A)-B(2A)-B(5A)-C(1A)  | -105.06(9)  |
| B(3A)-B(2A)-B(5A)-C(1A)  | -46.78(7)   |
| C(1A)-B(2A)-B(5A)-B(9A)  | 105.16(9)   |
| B(6A)-B(2A)-B(5A)-B(9A)  | -46.02(7)   |
| B(7A)-B(2A)-B(5A)-B(9A)  | 0.10(9)     |
| B(3A)-B(2A)-B(5A)-B(9A)  | 58.38(8)    |
| C(1A)-B(2A)-B(5A)-B(6A)  | 151.18(9)   |
| B(7A)-B(2A)-B(5A)-B(6A)  | 46.13(7)    |
| B(3A)-B(2A)-B(5A)-B(6A)  | 104.41(8)   |
| C(1A)-B(2A)-B(5A)-B(4A)  | 46.28(7)    |
| B(6A)-B(2A)-B(5A)-B(4A)  | -104.91(8)  |
| B(7A)-B(2A)-B(5A)-B(4A)  | -58.78(8)   |
| B(3A)-B(2A)-B(5A)-B(4A)  | -0.50(7)    |
| C(1A)-B(5A)-B(6A)-B(10A) | -79.27(11)  |
| B(9A)-B(5A)-B(6A)-B(10A) | 23.25(9)    |
| B(4A)-B(5A)-B(6A)-B(10A) | -21.71(11)  |
| B(2A)-B(5A)-B(6A)-B(10A) | -104.05(10) |
| C(1A)-B(5A)-B(6A)-B(2A)  | 24.78(8)    |
| B(9A)-B(5A)-B(6A)-B(2A)  | 127.30(8)   |
| B(4A)-B(5A)-B(6A)-B(2A)  | 82.34(8)    |
| C(1A)-B(5A)-B(6A)-B(7A)  | -20.25(10)  |
| B(9A)-B(5A)-B(6A)-B(7A)  | 82.27(8)    |
| B(4A)-B(5A)-B(6A)-B(7A)  | 37.31(9)    |
| B(2A)-B(5A)-B(6A)-B(7A)  | -45.03(7)   |
| C(1A)-B(5A)-B(6A)-B(9A)  | -102.53(9)  |
| B(4A)-B(5A)-B(6A)-B(9A)  | -44.96(7)   |
| B(2A)-B(5A)-B(6A)-B(9A)  | -127.30(8)  |

|                          |             |
|--------------------------|-------------|
| C(1A)-B(2A)-B(6A)-B(10A) | 78.50(11)   |
| B(7A)-B(2A)-B(6A)-B(10A) | -23.32(8)   |
| B(5A)-B(2A)-B(6A)-B(10A) | 103.20(9)   |
| B(3A)-B(2A)-B(6A)-B(10A) | 21.01(11)   |
| C(1A)-B(2A)-B(6A)-B(5A)  | -24.70(8)   |
| B(7A)-B(2A)-B(6A)-B(5A)  | -126.52(8)  |
| B(3A)-B(2A)-B(6A)-B(5A)  | -82.19(8)   |
| C(1A)-B(2A)-B(6A)-B(7A)  | 101.83(9)   |
| B(5A)-B(2A)-B(6A)-B(7A)  | 126.52(8)   |
| B(3A)-B(2A)-B(6A)-B(7A)  | 44.34(7)    |
| C(1A)-B(2A)-B(6A)-B(9A)  | 19.56(10)   |
| B(7A)-B(2A)-B(6A)-B(9A)  | -82.26(8)   |
| B(5A)-B(2A)-B(6A)-B(9A)  | 44.26(7)    |
| B(3A)-B(2A)-B(6A)-B(9A)  | -37.93(9)   |
| C(1A)-B(3A)-B(7A)-B(10A) | 78.12(11)   |
| B(8A)-B(3A)-B(7A)-B(10A) | -23.69(9)   |
| B(4A)-B(3A)-B(7A)-B(10A) | 20.82(11)   |
| B(2A)-B(3A)-B(7A)-B(10A) | 103.48(10)  |
| C(1A)-B(3A)-B(7A)-B(2A)  | -25.36(8)   |
| B(8A)-B(3A)-B(7A)-B(2A)  | -127.17(8)  |
| B(4A)-B(3A)-B(7A)-B(2A)  | -82.66(8)   |
| C(1A)-B(3A)-B(7A)-B(6A)  | 19.02(11)   |
| B(8A)-B(3A)-B(7A)-B(6A)  | -82.79(8)   |
| B(4A)-B(3A)-B(7A)-B(6A)  | -38.28(9)   |
| B(2A)-B(3A)-B(7A)-B(6A)  | 44.37(7)    |
| C(1A)-B(3A)-B(7A)-B(8A)  | 101.81(9)   |
| B(4A)-B(3A)-B(7A)-B(8A)  | 44.51(7)    |
| B(2A)-B(3A)-B(7A)-B(8A)  | 127.17(8)   |
| C(1A)-B(2A)-B(7A)-B(10A) | -78.29(11)  |
| B(6A)-B(2A)-B(7A)-B(10A) | 23.29(8)    |
| B(5A)-B(2A)-B(7A)-B(10A) | -21.39(11)  |
| B(3A)-B(2A)-B(7A)-B(10A) | -103.92(10) |
| C(1A)-B(2A)-B(7A)-B(3A)  | 25.63(8)    |
| B(6A)-B(2A)-B(7A)-B(3A)  | 127.21(8)   |
| B(5A)-B(2A)-B(7A)-B(3A)  | 82.53(8)    |
| C(1A)-B(2A)-B(7A)-B(6A)  | -101.58(9)  |



|                          |            |
|--------------------------|------------|
| B(5A)-B(2A)-B(7A)-B(6A)  | -44.68(7)  |
| B(3A)-B(2A)-B(7A)-B(6A)  | -127.21(8) |
| C(1A)-B(2A)-B(7A)-B(8A)  | -18.88(11) |
| B(6A)-B(2A)-B(7A)-B(8A)  | 82.70(8)   |
| B(5A)-B(2A)-B(7A)-B(8A)  | 38.03(9)   |
| B(3A)-B(2A)-B(7A)-B(8A)  | -44.51(8)  |
| B(5A)-B(6A)-B(7A)-B(10A) | -107.68(9) |
| B(2A)-B(6A)-B(7A)-B(10A) | -154.00(9) |
| B(9A)-B(6A)-B(7A)-B(10A) | -49.52(7)  |
| B(10A)-B(6A)-B(7A)-B(3A) | 108.24(9)  |
| B(5A)-B(6A)-B(7A)-B(3A)  | 0.55(10)   |
| B(2A)-B(6A)-B(7A)-B(3A)  | -45.76(7)  |
| B(9A)-B(6A)-B(7A)-B(3A)  | 58.72(8)   |
| B(10A)-B(6A)-B(7A)-B(2A) | 154.00(9)  |
| B(5A)-B(6A)-B(7A)-B(2A)  | 46.31(7)   |
| B(9A)-B(6A)-B(7A)-B(2A)  | 104.48(8)  |
| B(10A)-B(6A)-B(7A)-B(8A) | 49.73(7)   |
| B(5A)-B(6A)-B(7A)-B(8A)  | -57.95(8)  |
| B(2A)-B(6A)-B(7A)-B(8A)  | -104.27(8) |
| B(9A)-B(6A)-B(7A)-B(8A)  | 0.21(7)    |
| C(1A)-B(4A)-B(8A)-B(10A) | 77.14(11)  |
| B(9A)-B(4A)-B(8A)-B(10A) | -23.90(8)  |
| B(3A)-B(4A)-B(8A)-B(10A) | 103.02(10) |
| B(5A)-B(4A)-B(8A)-B(10A) | 20.07(11)  |
| C(1A)-B(4A)-B(8A)-B(3A)  | -25.88(8)  |
| B(9A)-B(4A)-B(8A)-B(3A)  | -126.91(8) |
| B(5A)-B(4A)-B(8A)-B(3A)  | -82.95(8)  |
| C(1A)-B(4A)-B(8A)-B(9A)  | 101.03(9)  |
| B(3A)-B(4A)-B(8A)-B(9A)  | 126.91(8)  |
| B(5A)-B(4A)-B(8A)-B(9A)  | 43.96(7)   |
| C(1A)-B(4A)-B(8A)-B(7A)  | 18.46(11)  |
| B(9A)-B(4A)-B(8A)-B(7A)  | -82.58(8)  |
| B(3A)-B(4A)-B(8A)-B(7A)  | 44.34(7)   |
| B(5A)-B(4A)-B(8A)-B(7A)  | -38.61(10) |
| C(1A)-B(3A)-B(8A)-B(10A) | -78.07(11) |
| B(7A)-B(3A)-B(8A)-B(10A) | 23.42(8)   |

|                          |             |
|--------------------------|-------------|
| B(4A)-B(3A)-B(8A)-B(10A) | -103.69(10) |
| B(2A)-B(3A)-B(8A)-B(10A) | -21.20(11)  |
| C(1A)-B(3A)-B(8A)-B(4A)  | 25.62(8)    |
| B(7A)-B(3A)-B(8A)-B(4A)  | 127.11(8)   |
| B(2A)-B(3A)-B(8A)-B(4A)  | 82.49(8)    |
| C(1A)-B(3A)-B(8A)-B(9A)  | -19.24(10)  |
| B(7A)-B(3A)-B(8A)-B(9A)  | 82.25(8)    |
| B(4A)-B(3A)-B(8A)-B(9A)  | -44.86(7)   |
| B(2A)-B(3A)-B(8A)-B(9A)  | 37.63(9)    |
| C(1A)-B(3A)-B(8A)-B(7A)  | -101.49(9)  |
| B(4A)-B(3A)-B(8A)-B(7A)  | -127.11(8)  |
| B(2A)-B(3A)-B(8A)-B(7A)  | -44.62(7)   |
| B(3A)-B(7A)-B(8A)-B(10A) | -153.68(9)  |
| B(2A)-B(7A)-B(8A)-B(10A) | -107.87(9)  |
| B(6A)-B(7A)-B(8A)-B(10A) | -49.53(7)   |
| B(10A)-B(7A)-B(8A)-B(4A) | 108.11(9)   |
| B(3A)-B(7A)-B(8A)-B(4A)  | -45.57(8)   |
| B(2A)-B(7A)-B(8A)-B(4A)  | 0.24(10)    |
| B(6A)-B(7A)-B(8A)-B(4A)  | 58.59(9)    |
| B(10A)-B(7A)-B(8A)-B(3A) | 153.68(9)   |
| B(2A)-B(7A)-B(8A)-B(3A)  | 45.81(8)    |
| B(6A)-B(7A)-B(8A)-B(3A)  | 104.15(8)   |
| B(10A)-B(7A)-B(8A)-B(9A) | 49.32(7)    |
| B(3A)-B(7A)-B(8A)-B(9A)  | -104.36(8)  |
| B(2A)-B(7A)-B(8A)-B(9A)  | -58.56(8)   |
| B(6A)-B(7A)-B(8A)-B(9A)  | -0.21(7)    |
| C(1A)-B(5A)-B(9A)-B(10A) | 78.51(11)   |
| B(6A)-B(5A)-B(9A)-B(10A) | -23.35(9)   |
| B(4A)-B(5A)-B(9A)-B(10A) | 103.73(10)  |
| B(2A)-B(5A)-B(9A)-B(10A) | 21.24(11)   |
| C(1A)-B(5A)-B(9A)-B(4A)  | -25.22(8)   |
| B(6A)-B(5A)-B(9A)-B(4A)  | -127.07(8)  |
| B(2A)-B(5A)-B(9A)-B(4A)  | -82.49(8)   |
| C(1A)-B(5A)-B(9A)-B(8A)  | 18.85(10)   |
| B(6A)-B(5A)-B(9A)-B(8A)  | -83.01(8)   |
| B(4A)-B(5A)-B(9A)-B(8A)  | 44.06(7)    |

|                          |            |
|--------------------------|------------|
| B(2A)-B(5A)-B(9A)-B(8A)  | -38.43(9)  |
| C(1A)-B(5A)-B(9A)-B(6A)  | 101.85(9)  |
| B(4A)-B(5A)-B(9A)-B(6A)  | 127.07(8)  |
| B(2A)-B(5A)-B(9A)-B(6A)  | 44.58(7)   |
| C(1A)-B(4A)-B(9A)-B(10A) | -78.49(11) |
| B(8A)-B(4A)-B(9A)-B(10A) | 24.13(8)   |
| B(3A)-B(4A)-B(9A)-B(10A) | -20.77(11) |
| B(5A)-B(4A)-B(9A)-B(10A) | -103.44(9) |
| C(1A)-B(4A)-B(9A)-B(5A)  | 24.95(8)   |
| B(8A)-B(4A)-B(9A)-B(5A)  | 127.57(8)  |
| B(3A)-B(4A)-B(9A)-B(5A)  | 82.67(8)   |
| C(1A)-B(4A)-B(9A)-B(8A)  | -102.62(9) |
| B(3A)-B(4A)-B(9A)-B(8A)  | -44.90(7)  |
| B(5A)-B(4A)-B(9A)-B(8A)  | -127.57(8) |
| C(1A)-B(4A)-B(9A)-B(6A)  | -19.44(10) |
| B(8A)-B(4A)-B(9A)-B(6A)  | 83.18(8)   |
| B(3A)-B(4A)-B(9A)-B(6A)  | 38.28(9)   |
| B(5A)-B(4A)-B(9A)-B(6A)  | -44.39(7)  |
| C(1A)-B(4A)-B(9A)-Li(1)  | -157.21(9) |
| B(8A)-B(4A)-B(9A)-Li(1)  | -54.59(10) |
| B(3A)-B(4A)-B(9A)-Li(1)  | -99.49(11) |
| B(5A)-B(4A)-B(9A)-Li(1)  | 177.84(11) |
| B(4A)-B(8A)-B(9A)-B(10A) | -153.23(9) |
| B(3A)-B(8A)-B(9A)-B(10A) | -107.46(9) |
| B(7A)-B(8A)-B(9A)-B(10A) | -49.27(7)  |
| B(10A)-B(8A)-B(9A)-B(5A) | 107.83(9)  |
| B(4A)-B(8A)-B(9A)-B(5A)  | -45.40(7)  |
| B(3A)-B(8A)-B(9A)-B(5A)  | 0.37(10)   |
| B(7A)-B(8A)-B(9A)-B(5A)  | 58.56(8)   |
| B(10A)-B(8A)-B(9A)-B(4A) | 153.23(9)  |
| B(3A)-B(8A)-B(9A)-B(4A)  | 45.77(7)   |
| B(7A)-B(8A)-B(9A)-B(4A)  | 103.96(8)  |
| B(10A)-B(8A)-B(9A)-B(6A) | 49.48(7)   |
| B(4A)-B(8A)-B(9A)-B(6A)  | -103.75(8) |
| B(3A)-B(8A)-B(9A)-B(6A)  | -57.98(8)  |
| B(7A)-B(8A)-B(9A)-B(6A)  | 0.21(7)    |

|                          |             |
|--------------------------|-------------|
| B(10A)-B(8A)-B(9A)-Li(1) | -67.49(8)   |
| B(4A)-B(8A)-B(9A)-Li(1)  | 139.27(8)   |
| B(3A)-B(8A)-B(9A)-Li(1)  | -174.95(8)  |
| B(7A)-B(8A)-B(9A)-Li(1)  | -116.76(8)  |
| B(5A)-B(6A)-B(9A)-B(10A) | 153.93(10)  |
| B(2A)-B(6A)-B(9A)-B(10A) | 108.18(9)   |
| B(7A)-B(6A)-B(9A)-B(10A) | 49.63(7)    |
| B(10A)-B(6A)-B(9A)-B(5A) | -153.93(10) |
| B(2A)-B(6A)-B(9A)-B(5A)  | -45.75(7)   |
| B(7A)-B(6A)-B(9A)-B(5A)  | -104.30(8)  |
| B(10A)-B(6A)-B(9A)-B(4A) | -108.20(9)  |
| B(5A)-B(6A)-B(9A)-B(4A)  | 45.73(7)    |
| B(2A)-B(6A)-B(9A)-B(4A)  | -0.02(10)   |
| B(7A)-B(6A)-B(9A)-B(4A)  | -58.57(8)   |
| B(10A)-B(6A)-B(9A)-B(8A) | -49.84(8)   |
| B(5A)-B(6A)-B(9A)-B(8A)  | 104.09(8)   |
| B(2A)-B(6A)-B(9A)-B(8A)  | 58.34(8)    |
| B(7A)-B(6A)-B(9A)-B(8A)  | -0.21(7)    |
| B(10A)-B(6A)-B(9A)-Li(1) | 34.85(9)    |
| B(5A)-B(6A)-B(9A)-Li(1)  | -171.22(10) |
| B(2A)-B(6A)-B(9A)-Li(1)  | 143.03(9)   |
| B(7A)-B(6A)-B(9A)-Li(1)  | 84.48(9)    |
| B(5A)-B(9A)-B(10A)-B(7A) | -33.74(11)  |
| B(4A)-B(9A)-B(10A)-B(7A) | 32.85(11)   |
| B(8A)-B(9A)-B(10A)-B(7A) | 57.40(8)    |
| B(6A)-B(9A)-B(10A)-B(7A) | -57.64(8)   |
| Li(1)-B(9A)-B(10A)-B(7A) | 155.59(9)   |
| B(5A)-B(9A)-B(10A)-B(6A) | 23.90(9)    |
| B(4A)-B(9A)-B(10A)-B(6A) | 90.49(9)    |
| B(8A)-B(9A)-B(10A)-B(6A) | 115.04(8)   |
| Li(1)-B(9A)-B(10A)-B(6A) | -146.77(9)  |
| B(5A)-B(9A)-B(10A)-B(8A) | -91.14(9)   |
| B(4A)-B(9A)-B(10A)-B(8A) | -24.55(8)   |
| B(6A)-B(9A)-B(10A)-B(8A) | -115.04(9)  |
| Li(1)-B(9A)-B(10A)-B(8A) | 98.19(8)    |
| B(5A)-B(9A)-B(10A)-Li(1) | 170.67(10)  |

|                          |             |
|--------------------------|-------------|
| B(4A)-B(9A)-B(10A)-Li(1) | -122.74(9)  |
| B(8A)-B(9A)-B(10A)-Li(1) | -98.19(8)   |
| B(6A)-B(9A)-B(10A)-Li(1) | 146.77(9)   |
| B(3A)-B(7A)-B(10A)-B(9A) | -32.95(11)  |
| B(2A)-B(7A)-B(10A)-B(9A) | 33.86(11)   |
| B(6A)-B(7A)-B(10A)-B(9A) | 57.72(8)    |
| B(8A)-B(7A)-B(10A)-B(9A) | -57.19(8)   |
| B(3A)-B(7A)-B(10A)-B(6A) | -90.67(9)   |
| B(2A)-B(7A)-B(10A)-B(6A) | -23.86(8)   |
| B(8A)-B(7A)-B(10A)-B(6A) | -114.91(8)  |
| B(3A)-B(7A)-B(10A)-B(8A) | 24.24(9)    |
| B(2A)-B(7A)-B(10A)-B(8A) | 91.05(9)    |
| B(6A)-B(7A)-B(10A)-B(8A) | 114.91(8)   |
| B(3A)-B(7A)-B(10A)-Li(1) | 43.4(3)     |
| B(2A)-B(7A)-B(10A)-Li(1) | 110.2(2)    |
| B(6A)-B(7A)-B(10A)-Li(1) | 134.1(2)    |
| B(8A)-B(7A)-B(10A)-Li(1) | 19.2(2)     |
| B(5A)-B(6A)-B(10A)-B(9A) | -23.85(9)   |
| B(2A)-B(6A)-B(10A)-B(9A) | -90.69(9)   |
| B(7A)-B(6A)-B(10A)-B(9A) | -114.68(9)  |
| B(5A)-B(6A)-B(10A)-B(7A) | 90.83(9)    |
| B(2A)-B(6A)-B(10A)-B(7A) | 23.99(8)    |
| B(9A)-B(6A)-B(10A)-B(7A) | 114.68(9)   |
| B(5A)-B(6A)-B(10A)-B(8A) | 33.34(11)   |
| B(2A)-B(6A)-B(10A)-B(8A) | -33.50(11)  |
| B(7A)-B(6A)-B(10A)-B(8A) | -57.49(8)   |
| B(9A)-B(6A)-B(10A)-B(8A) | 57.19(8)    |
| B(5A)-B(6A)-B(10A)-Li(1) | -66.83(14)  |
| B(2A)-B(6A)-B(10A)-Li(1) | -133.67(11) |
| B(7A)-B(6A)-B(10A)-Li(1) | -157.66(13) |
| B(9A)-B(6A)-B(10A)-Li(1) | -42.98(11)  |
| B(4A)-B(8A)-B(10A)-B(9A) | 24.69(9)    |
| B(3A)-B(8A)-B(10A)-B(9A) | 90.93(9)    |
| B(7A)-B(8A)-B(10A)-B(9A) | 114.99(8)   |
| B(4A)-B(8A)-B(10A)-B(7A) | -90.31(9)   |
| B(3A)-B(8A)-B(10A)-B(7A) | -24.06(9)   |

|                          |            |
|--------------------------|------------|
| B(9A)-B(8A)-B(10A)-B(7A) | -114.99(8) |
| B(4A)-B(8A)-B(10A)-B(6A) | -32.80(11) |
| B(3A)-B(8A)-B(10A)-B(6A) | 33.44(11)  |
| B(9A)-B(8A)-B(10A)-B(6A) | -57.49(8)  |
| B(7A)-B(8A)-B(10A)-B(6A) | 57.50(8)   |
| B(4A)-B(8A)-B(10A)-Li(1) | 97.44(9)   |
| B(3A)-B(8A)-B(10A)-Li(1) | 163.68(9)  |
| B(9A)-B(8A)-B(10A)-Li(1) | 72.75(8)   |
| B(7A)-B(8A)-B(10A)-Li(1) | -172.26(9) |
| C(1A)-P(1A)-C(2A)-C(3A)  | 70.89(8)   |
| C(5A)-P(1A)-C(2A)-C(3A)  | -175.84(8) |
| Rh(1)-P(1A)-C(2A)-C(3A)  | -50.64(8)  |
| C(1A)-P(1A)-C(2A)-C(4A)  | -57.61(9)  |
| C(5A)-P(1A)-C(2A)-C(4A)  | 55.67(9)   |
| Rh(1)-P(1A)-C(2A)-C(4A)  | -179.13(7) |
| C(1A)-P(1A)-C(5A)-C(7A)  | -59.95(10) |
| C(2A)-P(1A)-C(5A)-C(7A)  | -173.00(9) |
| Rh(1)-P(1A)-C(5A)-C(7A)  | 65.06(9)   |
| C(1A)-P(1A)-C(5A)-C(6A)  | 176.75(8)  |
| C(2A)-P(1A)-C(5A)-C(6A)  | 63.70(9)   |
| Rh(1)-P(1A)-C(5A)-C(6A)  | -58.24(9)  |
| B(9A)-B(5A)-C(1A)-B(2A)  | -92.17(9)  |
| B(6A)-B(5A)-C(1A)-B(2A)  | -26.06(8)  |
| B(4A)-B(5A)-C(1A)-B(2A)  | -118.69(8) |
| B(9A)-B(5A)-C(1A)-B(4A)  | 26.52(8)   |
| B(6A)-B(5A)-C(1A)-B(4A)  | 92.63(9)   |
| B(2A)-B(5A)-C(1A)-B(4A)  | 118.69(8)  |
| B(9A)-B(5A)-C(1A)-B(3A)  | -32.35(11) |
| B(6A)-B(5A)-C(1A)-B(3A)  | 33.76(10)  |
| B(4A)-B(5A)-C(1A)-B(3A)  | -58.87(8)  |
| B(2A)-B(5A)-C(1A)-B(3A)  | 59.82(8)   |
| B(9A)-B(5A)-C(1A)-P(1A)  | 145.24(7)  |
| B(6A)-B(5A)-C(1A)-P(1A)  | -148.65(7) |
| B(4A)-B(5A)-C(1A)-P(1A)  | 118.72(9)  |
| B(2A)-B(5A)-C(1A)-P(1A)  | -122.59(9) |
| B(6A)-B(2A)-C(1A)-B(5A)  | 25.86(8)   |

|                         |             |
|-------------------------|-------------|
| B(7A)-B(2A)-C(1A)-B(5A) | 91.23(9)    |
| B(3A)-B(2A)-C(1A)-B(5A) | 117.96(8)   |
| B(6A)-B(2A)-C(1A)-B(4A) | -33.48(11)  |
| B(7A)-B(2A)-C(1A)-B(4A) | 31.88(11)   |
| B(5A)-B(2A)-C(1A)-B(4A) | -59.35(8)   |
| B(3A)-B(2A)-C(1A)-B(4A) | 58.61(8)    |
| B(6A)-B(2A)-C(1A)-B(3A) | -92.10(9)   |
| B(7A)-B(2A)-C(1A)-B(3A) | -26.73(8)   |
| B(5A)-B(2A)-C(1A)-B(3A) | -117.96(8)  |
| B(6A)-B(2A)-C(1A)-P(1A) | 141.38(8)   |
| B(7A)-B(2A)-C(1A)-P(1A) | -153.25(8)  |
| B(5A)-B(2A)-C(1A)-P(1A) | 115.52(10)  |
| B(3A)-B(2A)-C(1A)-P(1A) | -126.52(10) |
| B(8A)-B(4A)-C(1A)-B(5A) | -91.46(9)   |
| B(9A)-B(4A)-C(1A)-B(5A) | -26.11(8)   |
| B(3A)-B(4A)-C(1A)-B(5A) | -118.55(8)  |
| B(8A)-B(4A)-C(1A)-B(2A) | -31.93(11)  |
| B(9A)-B(4A)-C(1A)-B(2A) | 33.42(11)   |
| B(3A)-B(4A)-C(1A)-B(2A) | -59.02(8)   |
| B(5A)-B(4A)-C(1A)-B(2A) | 59.52(8)    |
| B(8A)-B(4A)-C(1A)-B(3A) | 27.09(8)    |
| B(9A)-B(4A)-C(1A)-B(3A) | 92.44(9)    |
| B(5A)-B(4A)-C(1A)-B(3A) | 118.55(8)   |
| B(8A)-B(4A)-C(1A)-P(1A) | 152.99(8)   |
| B(9A)-B(4A)-C(1A)-P(1A) | -141.66(8)  |
| B(3A)-B(4A)-C(1A)-P(1A) | 125.91(10)  |
| B(5A)-B(4A)-C(1A)-P(1A) | -115.55(9)  |
| B(7A)-B(3A)-C(1A)-B(5A) | -33.15(11)  |
| B(8A)-B(3A)-C(1A)-B(5A) | 32.38(11)   |
| B(4A)-B(3A)-C(1A)-B(5A) | 59.21(8)    |
| B(2A)-B(3A)-C(1A)-B(5A) | -59.92(8)   |
| B(7A)-B(3A)-C(1A)-B(2A) | 26.76(8)    |
| B(8A)-B(3A)-C(1A)-B(2A) | 92.30(9)    |
| B(4A)-B(3A)-C(1A)-B(2A) | 119.13(8)   |
| B(7A)-B(3A)-C(1A)-B(4A) | -92.36(9)   |
| B(8A)-B(3A)-C(1A)-B(4A) | -26.82(8)   |

|                         |             |
|-------------------------|-------------|
| B(2A)-B(3A)-C(1A)-B(4A) | -119.13(8)  |
| B(7A)-B(3A)-C(1A)-P(1A) | 149.55(8)   |
| B(8A)-B(3A)-C(1A)-P(1A) | -144.91(8)  |
| B(4A)-B(3A)-C(1A)-P(1A) | -118.09(10) |
| B(2A)-B(3A)-C(1A)-P(1A) | 122.79(10)  |
| C(2A)-P(1A)-C(1A)-B(5A) | 173.65(8)   |
| C(5A)-P(1A)-C(1A)-B(5A) | 63.12(9)    |
| Rh(1)-P(1A)-C(1A)-B(5A) | -64.82(8)   |
| C(2A)-P(1A)-C(1A)-B(2A) | 85.50(10)   |
| C(5A)-P(1A)-C(1A)-B(2A) | -25.02(10)  |
| Rh(1)-P(1A)-C(1A)-B(2A) | -152.97(8)  |
| C(2A)-P(1A)-C(1A)-B(4A) | -100.45(9)  |
| C(5A)-P(1A)-C(1A)-B(4A) | 149.02(9)   |
| Rh(1)-P(1A)-C(1A)-B(4A) | 21.08(9)    |
| C(2A)-P(1A)-C(1A)-B(3A) | -9.41(11)   |
| C(5A)-P(1A)-C(1A)-B(3A) | -119.93(10) |
| Rh(1)-P(1A)-C(1A)-B(3A) | 112.12(9)   |
| C(5B)-P(1B)-C(1B)-B(4B) | -82.31(10)  |
| C(2B)-P(1B)-C(1B)-B(4B) | 29.93(11)   |
| Rh(1)-P(1B)-C(1B)-B(4B) | 157.35(8)   |
| C(5B)-P(1B)-C(1B)-B(5B) | -173.55(8)  |
| C(2B)-P(1B)-C(1B)-B(5B) | -61.31(9)   |
| Rh(1)-P(1B)-C(1B)-B(5B) | 66.11(9)    |
| C(5B)-P(1B)-C(1B)-B(3B) | 11.60(10)   |
| C(2B)-P(1B)-C(1B)-B(3B) | 123.84(9)   |
| Rh(1)-P(1B)-C(1B)-B(3B) | -108.74(9)  |
| C(5B)-P(1B)-C(1B)-B(2B) | 100.61(9)   |
| C(2B)-P(1B)-C(1B)-B(2B) | -147.16(8)  |
| Rh(1)-P(1B)-C(1B)-B(2B) | -19.73(9)   |
| B(4B)-C(1B)-B(2B)-B(7B) | 31.89(11)   |
| B(5B)-C(1B)-B(2B)-B(7B) | 92.02(9)    |
| B(3B)-C(1B)-B(2B)-B(7B) | -27.30(9)   |
| P(1B)-C(1B)-B(2B)-B(7B) | -150.49(8)  |
| B(4B)-C(1B)-B(2B)-B(6B) | -33.27(11)  |
| B(5B)-C(1B)-B(2B)-B(6B) | 26.85(8)    |
| B(3B)-C(1B)-B(2B)-B(6B) | -92.47(9)   |



|                         |             |
|-------------------------|-------------|
| P(1B)-C(1B)-B(2B)-B(6B) | 144.34(8)   |
| B(4B)-C(1B)-B(2B)-B(5B) | -60.13(8)   |
| B(3B)-C(1B)-B(2B)-B(5B) | -119.32(8)  |
| P(1B)-C(1B)-B(2B)-B(5B) | 117.49(9)   |
| B(4B)-C(1B)-B(2B)-B(3B) | 59.20(8)    |
| B(5B)-C(1B)-B(2B)-B(3B) | 119.32(8)   |
| P(1B)-C(1B)-B(2B)-B(3B) | -123.19(10) |
| B(4B)-C(1B)-B(3B)-B(7B) | -91.71(9)   |
| B(5B)-C(1B)-B(3B)-B(7B) | -30.92(11)  |
| B(2B)-C(1B)-B(3B)-B(7B) | 27.19(9)    |
| P(1B)-C(1B)-B(3B)-B(7B) | 144.62(8)   |
| B(4B)-C(1B)-B(3B)-B(8B) | -26.49(8)   |
| B(5B)-C(1B)-B(3B)-B(8B) | 34.30(11)   |
| B(2B)-C(1B)-B(3B)-B(8B) | 92.41(9)    |
| P(1B)-C(1B)-B(3B)-B(8B) | -150.16(8)  |
| B(4B)-C(1B)-B(3B)-B(2B) | -118.91(8)  |
| B(5B)-C(1B)-B(3B)-B(2B) | -58.12(8)   |
| P(1B)-C(1B)-B(3B)-B(2B) | 117.42(10)  |
| B(5B)-C(1B)-B(3B)-B(4B) | 60.79(8)    |
| B(2B)-C(1B)-B(3B)-B(4B) | 118.91(8)   |
| P(1B)-C(1B)-B(3B)-B(4B) | -123.67(10) |
| B(7B)-B(2B)-B(3B)-C(1B) | 149.76(9)   |
| B(6B)-B(2B)-B(3B)-C(1B) | 104.31(9)   |
| B(5B)-B(2B)-B(3B)-C(1B) | 45.80(7)    |
| C(1B)-B(2B)-B(3B)-B(7B) | -149.76(9)  |
| B(6B)-B(2B)-B(3B)-B(7B) | -45.46(8)   |
| B(5B)-B(2B)-B(3B)-B(7B) | -103.97(8)  |
| C(1B)-B(2B)-B(3B)-B(8B) | -104.17(9)  |
| B(7B)-B(2B)-B(3B)-B(8B) | 45.60(8)    |
| B(6B)-B(2B)-B(3B)-B(8B) | 0.14(10)    |
| B(5B)-B(2B)-B(3B)-B(8B) | -58.37(9)   |
| C(1B)-B(2B)-B(3B)-B(4B) | -45.78(7)   |
| B(7B)-B(2B)-B(3B)-B(4B) | 103.99(8)   |
| B(6B)-B(2B)-B(3B)-B(4B) | 58.53(8)    |
| B(5B)-B(2B)-B(3B)-B(4B) | 0.02(8)     |
| B(5B)-C(1B)-B(4B)-B(8B) | -90.96(9)   |

|                         |             |
|-------------------------|-------------|
| B(3B)-C(1B)-B(4B)-B(8B) | 26.69(8)    |
| B(2B)-C(1B)-B(4B)-B(8B) | -31.96(11)  |
| P(1B)-C(1B)-B(4B)-B(8B) | 150.56(8)   |
| B(5B)-C(1B)-B(4B)-B(9B) | -25.64(8)   |
| B(3B)-C(1B)-B(4B)-B(9B) | 92.01(9)    |
| B(2B)-C(1B)-B(4B)-B(9B) | 33.36(11)   |
| P(1B)-C(1B)-B(4B)-B(9B) | -144.12(8)  |
| B(5B)-C(1B)-B(4B)-B(3B) | -117.64(8)  |
| B(2B)-C(1B)-B(4B)-B(3B) | -58.65(8)   |
| P(1B)-C(1B)-B(4B)-B(3B) | 123.88(10)  |
| B(3B)-C(1B)-B(4B)-B(5B) | 117.64(8)   |
| B(2B)-C(1B)-B(4B)-B(5B) | 59.00(8)    |
| P(1B)-C(1B)-B(4B)-B(5B) | -118.48(10) |
| B(7B)-B(3B)-B(4B)-C(1B) | 104.79(9)   |
| B(8B)-B(3B)-B(4B)-C(1B) | 150.46(9)   |
| B(2B)-B(3B)-B(4B)-C(1B) | 46.37(7)    |
| C(1B)-B(3B)-B(4B)-B(8B) | -150.46(9)  |
| B(7B)-B(3B)-B(4B)-B(8B) | -45.67(8)   |
| B(2B)-B(3B)-B(4B)-B(8B) | -104.09(8)  |
| C(1B)-B(3B)-B(4B)-B(9B) | -104.32(9)  |
| B(7B)-B(3B)-B(4B)-B(9B) | 0.47(10)    |
| B(8B)-B(3B)-B(4B)-B(9B) | 46.14(8)    |
| B(2B)-B(3B)-B(4B)-B(9B) | -57.95(8)   |
| C(1B)-B(3B)-B(4B)-B(5B) | -46.38(7)   |
| B(7B)-B(3B)-B(4B)-B(5B) | 58.40(9)    |
| B(8B)-B(3B)-B(4B)-B(5B) | 104.08(8)   |
| B(2B)-B(3B)-B(4B)-B(5B) | -0.02(7)    |
| B(4B)-C(1B)-B(5B)-B(6B) | 91.24(9)    |
| B(3B)-C(1B)-B(5B)-B(6B) | 30.98(11)   |
| B(2B)-C(1B)-B(5B)-B(6B) | -27.20(8)   |
| P(1B)-C(1B)-B(5B)-B(6B) | -144.82(8)  |
| B(4B)-C(1B)-B(5B)-B(9B) | 25.68(8)    |
| B(3B)-C(1B)-B(5B)-B(9B) | -34.59(11)  |
| B(2B)-C(1B)-B(5B)-B(9B) | -92.76(9)   |
| P(1B)-C(1B)-B(5B)-B(9B) | 149.61(8)   |
| B(4B)-C(1B)-B(5B)-B(2B) | 118.45(8)   |

|                          |             |
|--------------------------|-------------|
| B(3B)-C(1B)-B(5B)-B(2B)  | 58.18(8)    |
| P(1B)-C(1B)-B(5B)-B(2B)  | -117.62(9)  |
| B(3B)-C(1B)-B(5B)-B(4B)  | -60.27(8)   |
| B(2B)-C(1B)-B(5B)-B(4B)  | -118.45(8)  |
| P(1B)-C(1B)-B(5B)-B(4B)  | 123.93(9)   |
| B(7B)-B(2B)-B(5B)-C(1B)  | -104.74(9)  |
| B(6B)-B(2B)-B(5B)-C(1B)  | -150.13(9)  |
| B(3B)-B(2B)-B(5B)-C(1B)  | -45.94(7)   |
| C(1B)-B(2B)-B(5B)-B(6B)  | 150.13(9)   |
| B(7B)-B(2B)-B(5B)-B(6B)  | 45.38(8)    |
| B(3B)-B(2B)-B(5B)-B(6B)  | 104.19(8)   |
| C(1B)-B(2B)-B(5B)-B(9B)  | 104.13(9)   |
| B(7B)-B(2B)-B(5B)-B(9B)  | -0.61(10)   |
| B(6B)-B(2B)-B(5B)-B(9B)  | -45.99(8)   |
| B(3B)-B(2B)-B(5B)-B(9B)  | 58.20(8)    |
| C(1B)-B(2B)-B(5B)-B(4B)  | 45.92(7)    |
| B(7B)-B(2B)-B(5B)-B(4B)  | -58.82(8)   |
| B(6B)-B(2B)-B(5B)-B(4B)  | -104.21(8)  |
| B(3B)-B(2B)-B(5B)-B(4B)  | -0.02(8)    |
| B(8B)-B(4B)-B(5B)-C(1B)  | 105.32(9)   |
| B(9B)-B(4B)-B(5B)-C(1B)  | 151.37(9)   |
| B(3B)-B(4B)-B(5B)-C(1B)  | 46.86(7)    |
| C(1B)-B(4B)-B(5B)-B(6B)  | -105.77(9)  |
| B(8B)-B(4B)-B(5B)-B(6B)  | -0.45(10)   |
| B(9B)-B(4B)-B(5B)-B(6B)  | 45.60(8)    |
| B(3B)-B(4B)-B(5B)-B(6B)  | -58.90(8)   |
| C(1B)-B(4B)-B(5B)-B(9B)  | -151.37(9)  |
| B(8B)-B(4B)-B(5B)-B(9B)  | -46.05(8)   |
| B(3B)-B(4B)-B(5B)-B(9B)  | -104.50(8)  |
| C(1B)-B(4B)-B(5B)-B(2B)  | -46.85(7)   |
| B(8B)-B(4B)-B(5B)-B(2B)  | 58.47(9)    |
| B(9B)-B(4B)-B(5B)-B(2B)  | 104.52(8)   |
| B(3B)-B(4B)-B(5B)-B(2B)  | 0.02(7)     |
| C(1B)-B(5B)-B(6B)-B(10B) | -77.80(11)  |
| B(9B)-B(5B)-B(6B)-B(10B) | 23.10(9)    |
| B(2B)-B(5B)-B(6B)-B(10B) | -103.86(10) |

|                          |             |
|--------------------------|-------------|
| B(4B)-B(5B)-B(6B)-B(10B) | -21.09(11)  |
| C(1B)-B(5B)-B(6B)-B(2B)  | 26.06(8)    |
| B(9B)-B(5B)-B(6B)-B(2B)  | 126.96(9)   |
| B(4B)-B(5B)-B(6B)-B(2B)  | 82.77(8)    |
| C(1B)-B(5B)-B(6B)-B(7B)  | -18.09(11)  |
| B(9B)-B(5B)-B(6B)-B(7B)  | 82.81(9)    |
| B(2B)-B(5B)-B(6B)-B(7B)  | -44.15(8)   |
| B(4B)-B(5B)-B(6B)-B(7B)  | 38.62(10)   |
| C(1B)-B(5B)-B(6B)-B(9B)  | -100.90(9)  |
| B(2B)-B(5B)-B(6B)-B(9B)  | -126.96(9)  |
| B(4B)-B(5B)-B(6B)-B(9B)  | -44.19(7)   |
| C(1B)-B(2B)-B(6B)-B(10B) | 78.53(11)   |
| B(7B)-B(2B)-B(6B)-B(10B) | -23.37(9)   |
| B(5B)-B(2B)-B(6B)-B(10B) | 104.15(10)  |
| B(3B)-B(2B)-B(6B)-B(10B) | 21.05(11)   |
| C(1B)-B(2B)-B(6B)-B(5B)  | -25.62(8)   |
| B(7B)-B(2B)-B(6B)-B(5B)  | -127.52(8)  |
| B(3B)-B(2B)-B(6B)-B(5B)  | -83.10(8)   |
| C(1B)-B(2B)-B(6B)-B(7B)  | 101.90(9)   |
| B(5B)-B(2B)-B(6B)-B(7B)  | 127.52(8)   |
| B(3B)-B(2B)-B(6B)-B(7B)  | 44.42(8)    |
| C(1B)-B(2B)-B(6B)-B(9B)  | 19.14(11)   |
| B(7B)-B(2B)-B(6B)-B(9B)  | -82.76(9)   |
| B(5B)-B(2B)-B(6B)-B(9B)  | 44.76(8)    |
| B(3B)-B(2B)-B(6B)-B(9B)  | -38.33(10)  |
| C(1B)-B(2B)-B(7B)-B(10B) | -78.15(11)  |
| B(6B)-B(2B)-B(7B)-B(10B) | 23.29(9)    |
| B(5B)-B(2B)-B(7B)-B(10B) | -20.91(11)  |
| B(3B)-B(2B)-B(7B)-B(10B) | -104.18(10) |
| C(1B)-B(2B)-B(7B)-B(3B)  | 26.03(8)    |
| B(6B)-B(2B)-B(7B)-B(3B)  | 127.47(9)   |
| B(5B)-B(2B)-B(7B)-B(3B)  | 83.27(8)    |
| C(1B)-B(2B)-B(7B)-B(6B)  | -101.44(9)  |
| B(5B)-B(2B)-B(7B)-B(6B)  | -44.20(7)   |
| B(3B)-B(2B)-B(7B)-B(6B)  | -127.47(9)  |
| C(1B)-B(2B)-B(7B)-B(8B)  | -18.56(11)  |

|                          |             |
|--------------------------|-------------|
| B(6B)-B(2B)-B(7B)-B(8B)  | 82.88(9)    |
| B(5B)-B(2B)-B(7B)-B(8B)  | 38.68(10)   |
| B(3B)-B(2B)-B(7B)-B(8B)  | -44.60(8)   |
| C(1B)-B(3B)-B(7B)-B(10B) | 77.91(12)   |
| B(8B)-B(3B)-B(7B)-B(10B) | -23.28(9)   |
| B(2B)-B(3B)-B(7B)-B(10B) | 104.02(10)  |
| B(4B)-B(3B)-B(7B)-B(10B) | 21.10(12)   |
| C(1B)-B(3B)-B(7B)-B(2B)  | -26.11(8)   |
| B(8B)-B(3B)-B(7B)-B(2B)  | -127.30(9)  |
| B(4B)-B(3B)-B(7B)-B(2B)  | -82.92(8)   |
| C(1B)-B(3B)-B(7B)-B(6B)  | 18.40(11)   |
| B(8B)-B(3B)-B(7B)-B(6B)  | -82.78(9)   |
| B(2B)-B(3B)-B(7B)-B(6B)  | 44.52(8)    |
| B(4B)-B(3B)-B(7B)-B(6B)  | -38.41(10)  |
| C(1B)-B(3B)-B(7B)-B(8B)  | 101.18(9)   |
| B(2B)-B(3B)-B(7B)-B(8B)  | 127.30(9)   |
| B(4B)-B(3B)-B(7B)-B(8B)  | 44.38(8)    |
| B(5B)-B(6B)-B(7B)-B(10B) | -108.95(9)  |
| B(2B)-B(6B)-B(7B)-B(10B) | -154.21(10) |
| B(9B)-B(6B)-B(7B)-B(10B) | -50.18(8)   |
| B(10B)-B(6B)-B(7B)-B(2B) | 154.21(10)  |
| B(5B)-B(6B)-B(7B)-B(2B)  | 45.26(8)    |
| B(9B)-B(6B)-B(7B)-B(2B)  | 104.03(8)   |
| B(10B)-B(6B)-B(7B)-B(3B) | 108.65(10)  |
| B(5B)-B(6B)-B(7B)-B(3B)  | -0.30(10)   |
| B(2B)-B(6B)-B(7B)-B(3B)  | -45.56(8)   |
| B(9B)-B(6B)-B(7B)-B(3B)  | 58.47(9)    |
| B(10B)-B(6B)-B(7B)-B(8B) | 49.89(8)    |
| B(5B)-B(6B)-B(7B)-B(8B)  | -59.06(9)   |
| B(2B)-B(6B)-B(7B)-B(8B)  | -104.32(8)  |
| B(9B)-B(6B)-B(7B)-B(8B)  | -0.29(8)    |
| C(1B)-B(4B)-B(8B)-B(10B) | 78.27(11)   |
| B(9B)-B(4B)-B(8B)-B(10B) | -22.84(9)   |
| B(3B)-B(4B)-B(8B)-B(10B) | 103.73(10)  |
| B(5B)-B(4B)-B(8B)-B(10B) | 21.74(11)   |
| C(1B)-B(4B)-B(8B)-B(3B)  | -25.46(8)   |

|                          |             |
|--------------------------|-------------|
| B(9B)-B(4B)-B(8B)-B(3B)  | -126.57(8)  |
| B(5B)-B(4B)-B(8B)-B(3B)  | -81.99(8)   |
| C(1B)-B(4B)-B(8B)-B(7B)  | 18.91(11)   |
| B(9B)-B(4B)-B(8B)-B(7B)  | -82.21(8)   |
| B(3B)-B(4B)-B(8B)-B(7B)  | 44.37(8)    |
| B(5B)-B(4B)-B(8B)-B(7B)  | -37.63(10)  |
| C(1B)-B(4B)-B(8B)-B(9B)  | 101.12(9)   |
| B(3B)-B(4B)-B(8B)-B(9B)  | 126.57(8)   |
| B(5B)-B(4B)-B(8B)-B(9B)  | 44.58(7)    |
| C(1B)-B(3B)-B(8B)-B(10B) | -78.83(11)  |
| B(7B)-B(3B)-B(8B)-B(10B) | 23.16(9)    |
| B(2B)-B(3B)-B(8B)-B(10B) | -21.15(11)  |
| B(4B)-B(3B)-B(8B)-B(10B) | -104.01(10) |
| C(1B)-B(3B)-B(8B)-B(4B)  | 25.18(8)    |
| B(7B)-B(3B)-B(8B)-B(4B)  | 127.18(9)   |
| B(2B)-B(3B)-B(8B)-B(4B)  | 82.86(8)    |
| C(1B)-B(3B)-B(8B)-B(7B)  | -102.00(9)  |
| B(2B)-B(3B)-B(8B)-B(7B)  | -44.32(8)   |
| B(4B)-B(3B)-B(8B)-B(7B)  | -127.18(9)  |
| C(1B)-B(3B)-B(8B)-B(9B)  | -19.73(11)  |
| B(7B)-B(3B)-B(8B)-B(9B)  | 82.27(8)    |
| B(2B)-B(3B)-B(8B)-B(9B)  | 37.95(10)   |
| B(4B)-B(3B)-B(8B)-B(9B)  | -44.91(7)   |
| B(2B)-B(7B)-B(8B)-B(10B) | -108.62(10) |
| B(3B)-B(7B)-B(8B)-B(10B) | -154.28(10) |
| B(6B)-B(7B)-B(8B)-B(10B) | -49.80(8)   |
| B(10B)-B(7B)-B(8B)-B(4B) | 108.53(10)  |
| B(2B)-B(7B)-B(8B)-B(4B)  | -0.08(10)   |
| B(3B)-B(7B)-B(8B)-B(4B)  | -45.75(8)   |
| B(6B)-B(7B)-B(8B)-B(4B)  | 58.73(9)    |
| B(10B)-B(7B)-B(8B)-B(3B) | 154.28(10)  |
| B(2B)-B(7B)-B(8B)-B(3B)  | 45.66(8)    |
| B(6B)-B(7B)-B(8B)-B(3B)  | 104.48(8)   |
| B(10B)-B(7B)-B(8B)-B(9B) | 50.09(8)    |
| B(2B)-B(7B)-B(8B)-B(9B)  | -58.53(9)   |
| B(3B)-B(7B)-B(8B)-B(9B)  | -104.19(8)  |

|                          |             |
|--------------------------|-------------|
| B(6B)-B(7B)-B(8B)-B(9B)  | 0.29(8)     |
| C(1B)-B(5B)-B(9B)-B(10B) | 80.06(11)   |
| B(6B)-B(5B)-B(9B)-B(10B) | -22.95(9)   |
| B(2B)-B(5B)-B(9B)-B(10B) | 21.99(11)   |
| B(4B)-B(5B)-B(9B)-B(10B) | 104.45(10)  |
| C(1B)-B(5B)-B(9B)-B(4B)  | -24.39(8)   |
| B(6B)-B(5B)-B(9B)-B(4B)  | -127.41(9)  |
| B(2B)-B(5B)-B(9B)-B(4B)  | -82.46(8)   |
| C(1B)-B(5B)-B(9B)-B(6B)  | 103.01(9)   |
| B(2B)-B(5B)-B(9B)-B(6B)  | 44.95(7)    |
| B(4B)-B(5B)-B(9B)-B(6B)  | 127.41(9)   |
| C(1B)-B(5B)-B(9B)-B(8B)  | 20.51(11)   |
| B(6B)-B(5B)-B(9B)-B(8B)  | -82.50(8)   |
| B(2B)-B(5B)-B(9B)-B(8B)  | -37.56(9)   |
| B(4B)-B(5B)-B(9B)-B(8B)  | 44.90(7)    |
| C(1B)-B(4B)-B(9B)-B(10B) | -79.27(11)  |
| B(8B)-B(4B)-B(9B)-B(10B) | 22.96(9)    |
| B(3B)-B(4B)-B(9B)-B(10B) | -21.99(11)  |
| B(5B)-B(4B)-B(9B)-B(10B) | -103.65(10) |
| C(1B)-B(4B)-B(9B)-B(5B)  | 24.38(8)    |
| B(8B)-B(4B)-B(9B)-B(5B)  | 126.61(8)   |
| B(3B)-B(4B)-B(9B)-B(5B)  | 81.67(8)    |
| C(1B)-B(4B)-B(9B)-B(6B)  | -19.84(11)  |
| B(8B)-B(4B)-B(9B)-B(6B)  | 82.39(9)    |
| B(3B)-B(4B)-B(9B)-B(6B)  | 37.45(10)   |
| B(5B)-B(4B)-B(9B)-B(6B)  | -44.22(8)   |
| C(1B)-B(4B)-B(9B)-B(8B)  | -102.23(9)  |
| B(3B)-B(4B)-B(9B)-B(8B)  | -44.94(8)   |
| B(5B)-B(4B)-B(9B)-B(8B)  | -126.61(8)  |
| B(5B)-B(6B)-B(9B)-B(10B) | 154.47(10)  |
| B(2B)-B(6B)-B(9B)-B(10B) | 108.79(10)  |
| B(7B)-B(6B)-B(9B)-B(10B) | 50.39(8)    |
| B(10B)-B(6B)-B(9B)-B(5B) | -154.47(10) |
| B(2B)-B(6B)-B(9B)-B(5B)  | -45.68(8)   |
| B(7B)-B(6B)-B(9B)-B(5B)  | -104.08(8)  |
| B(10B)-B(6B)-B(9B)-B(4B) | -108.49(10) |

|                          |             |
|--------------------------|-------------|
| B(5B)-B(6B)-B(9B)-B(4B)  | 45.98(8)    |
| B(2B)-B(6B)-B(9B)-B(4B)  | 0.30(10)    |
| B(7B)-B(6B)-B(9B)-B(4B)  | -58.10(9)   |
| B(10B)-B(6B)-B(9B)-B(8B) | -50.10(8)   |
| B(5B)-B(6B)-B(9B)-B(8B)  | 104.37(8)   |
| B(2B)-B(6B)-B(9B)-B(8B)  | 58.69(9)    |
| B(7B)-B(6B)-B(9B)-B(8B)  | 0.29(8)     |
| B(4B)-B(8B)-B(9B)-B(10B) | -154.62(10) |
| B(3B)-B(8B)-B(9B)-B(10B) | -108.45(10) |
| B(7B)-B(8B)-B(9B)-B(10B) | -50.22(8)   |
| B(10B)-B(8B)-B(9B)-B(5B) | 108.09(9)   |
| B(4B)-B(8B)-B(9B)-B(5B)  | -46.53(8)   |
| B(3B)-B(8B)-B(9B)-B(5B)  | -0.36(10)   |
| B(7B)-B(8B)-B(9B)-B(5B)  | 57.86(9)    |
| B(10B)-B(8B)-B(9B)-B(4B) | 154.62(10)  |
| B(3B)-B(8B)-B(9B)-B(4B)  | 46.17(7)    |
| B(7B)-B(8B)-B(9B)-B(4B)  | 104.40(8)   |
| B(10B)-B(8B)-B(9B)-B(6B) | 49.93(8)    |
| B(4B)-B(8B)-B(9B)-B(6B)  | -104.69(8)  |
| B(3B)-B(8B)-B(9B)-B(6B)  | -58.52(9)   |
| B(7B)-B(8B)-B(9B)-B(6B)  | -0.29(8)    |
| B(5B)-B(6B)-B(10B)-B(9B) | -23.69(9)   |
| B(2B)-B(6B)-B(10B)-B(9B) | -90.34(9)   |
| B(7B)-B(6B)-B(10B)-B(9B) | -114.14(9)  |
| B(5B)-B(6B)-B(10B)-B(7B) | 90.45(10)   |
| B(2B)-B(6B)-B(10B)-B(7B) | 23.80(9)    |
| B(9B)-B(6B)-B(10B)-B(7B) | 114.14(9)   |
| B(5B)-B(6B)-B(10B)-B(8B) | 33.56(12)   |
| B(2B)-B(6B)-B(10B)-B(8B) | -33.10(12)  |
| B(7B)-B(6B)-B(10B)-B(8B) | -56.90(8)   |
| B(9B)-B(6B)-B(10B)-B(8B) | 57.24(8)    |
| B(5B)-B(9B)-B(10B)-B(6B) | 23.43(9)    |
| B(4B)-B(9B)-B(10B)-B(6B) | 90.97(9)    |
| B(8B)-B(9B)-B(10B)-B(6B) | 114.41(9)   |
| B(5B)-B(9B)-B(10B)-B(7B) | -33.65(11)  |
| B(4B)-B(9B)-B(10B)-B(7B) | 33.89(11)   |



|                          |             |
|--------------------------|-------------|
| B(6B)-B(9B)-B(10B)-B(7B) | -57.08(8)   |
| B(8B)-B(9B)-B(10B)-B(7B) | 57.33(8)    |
| B(5B)-B(9B)-B(10B)-B(8B) | -90.98(9)   |
| B(4B)-B(9B)-B(10B)-B(8B) | -23.44(9)   |
| B(6B)-B(9B)-B(10B)-B(8B) | -114.41(9)  |
| B(2B)-B(7B)-B(10B)-B(6B) | -23.91(9)   |
| B(3B)-B(7B)-B(10B)-B(6B) | -90.90(10)  |
| B(8B)-B(7B)-B(10B)-B(6B) | -114.75(9)  |
| B(2B)-B(7B)-B(10B)-B(9B) | 33.41(11)   |
| B(3B)-B(7B)-B(10B)-B(9B) | -33.58(12)  |
| B(6B)-B(7B)-B(10B)-B(9B) | 57.32(8)    |
| B(8B)-B(7B)-B(10B)-B(9B) | -57.43(8)   |
| B(2B)-B(7B)-B(10B)-B(8B) | 90.84(10)   |
| B(3B)-B(7B)-B(10B)-B(8B) | 23.86(9)    |
| B(6B)-B(7B)-B(10B)-B(8B) | 114.75(9)   |
| B(4B)-B(8B)-B(10B)-B(6B) | -33.80(12)  |
| B(3B)-B(8B)-B(10B)-B(6B) | 33.10(12)   |
| B(7B)-B(8B)-B(10B)-B(6B) | 56.76(8)    |
| B(9B)-B(8B)-B(10B)-B(6B) | -57.23(8)   |
| B(4B)-B(8B)-B(10B)-B(9B) | 23.43(9)    |
| B(3B)-B(8B)-B(10B)-B(9B) | 90.34(10)   |
| B(7B)-B(8B)-B(10B)-B(9B) | 113.99(9)   |
| B(4B)-B(8B)-B(10B)-B(7B) | -90.56(10)  |
| B(3B)-B(8B)-B(10B)-B(7B) | -23.65(9)   |
| B(9B)-B(8B)-B(10B)-B(7B) | -113.99(9)  |
| C(1B)-P(1B)-C(2B)-C(3B)  | 42.63(10)   |
| C(5B)-P(1B)-C(2B)-C(3B)  | 154.19(9)   |
| Rh(1)-P(1B)-C(2B)-C(3B)  | -83.10(9)   |
| C(1B)-P(1B)-C(2B)-C(4B)  | 166.68(8)   |
| C(5B)-P(1B)-C(2B)-C(4B)  | -81.76(9)   |
| Rh(1)-P(1B)-C(2B)-C(4B)  | 40.95(9)    |
| C(1B)-P(1B)-C(5B)-C(6B)  | 62.98(9)    |
| C(2B)-P(1B)-C(5B)-C(6B)  | -51.97(9)   |
| Rh(1)-P(1B)-C(5B)-C(6B)  | -176.63(7)  |
| C(1B)-P(1B)-C(5B)-C(7B)  | -169.16(10) |
| C(2B)-P(1B)-C(5B)-C(7B)  | 75.88(11)   |

|                          |             |
|--------------------------|-------------|
| Rh(1)-P(1B)-C(5B)-C(7B)  | -48.77(11)  |
| C(4T)-O(1T)-C(1T)-C(2T)  | -39.43(14)  |
| Li(1)-O(1T)-C(1T)-C(2T)  | 159.97(13)  |
| O(1T)-C(1T)-C(2T)-C(3T)  | 33.11(15)   |
| C(1T)-C(2T)-C(3T)-C(4T)  | -14.93(17)  |
| C(1T)-O(1T)-C(4T)-C(3T)  | 29.48(15)   |
| Li(1)-O(1T)-C(4T)-C(3T)  | -169.24(13) |
| C(2T)-C(3T)-C(4T)-O(1T)  | -8.07(17)   |
| O(1T)-Li(1)-O(2T)-C(8T)  | 15.1(2)     |
| B(10A)-Li(1)-O(2T)-C(8T) | 161.46(10)  |
| B(9A)-Li(1)-O(2T)-C(8T)  | 124.07(11)  |
| O(1T)-Li(1)-O(2T)-C(5T)  | -151.20(13) |
| B(10A)-Li(1)-O(2T)-C(5T) | -4.83(17)   |
| B(9A)-Li(1)-O(2T)-C(5T)  | -42.22(15)  |
| C(8T)-O(2T)-C(5T)-C(6T)  | 6.22(15)    |
| Li(1)-O(2T)-C(5T)-C(6T)  | 173.94(13)  |
| O(2T)-C(5T)-C(6T)-C(7T)  | -27.21(15)  |
| C(5T)-C(6T)-C(7T)-C(8T)  | 37.05(15)   |
| C(5T)-O(2T)-C(8T)-C(7T)  | 17.60(15)   |
| Li(1)-O(2T)-C(8T)-C(7T)  | -150.81(13) |
| C(6T)-C(7T)-C(8T)-O(2T)  | -34.01(15)  |
| C(6S)-C(1S)-C(2S)-C(3S)  | -0.2(2)     |
| C(1S)-C(2S)-C(3S)-C(4S)  | 0.1(2)      |
| C(2S)-C(3S)-C(4S)-C(5S)  | 0.1(3)      |
| C(3S)-C(4S)-C(5S)-C(6S)  | -0.2(3)     |
| C(2S)-C(1S)-C(6S)-C(5S)  | 0.1(2)      |
| C(4S)-C(5S)-C(6S)-C(1S)  | 0.1(3)      |

---

Symmetry transformations used to generate equivalent atoms:

### X-Ray Structure Data, Complex 8[Li<sup>+</sup>]

A yellow fragment of a prism (0.295 x 0.232 x 0.178 mm<sup>3</sup>) was used for the single crystal x-ray diffraction study of [C<sub>15</sub>H<sub>50</sub>B<sub>22</sub>OP<sub>2</sub>Rh].Li[C<sub>4</sub>H<sub>8</sub>O]<sub>4</sub> (sample vL140JE\_0m). The crystal was coated with paratone oil and mounted on to a cryo-loop glass fiber. X-ray intensity data were collected at 150(2) K on a Bruker APEX2 platform-CCD x-ray diffractometer system (fine focus Mo-radiation,  $\lambda = 0.71073 \text{ \AA}$ , 50KV/30mA power). The CCD detector was placed at a distance of 5.0600 cm from the crystal.

A total of 6000 frames were collected for a sphere of reflections (with scan width of 0.3° in  $\omega$  and  $\phi$ , starting  $\omega$  and  $2\theta$  angles of -30°, and  $\phi$  angles of 0°, 45°, 90°, 120°, 180°, 225°, 240°, and 270° for every 600 frames, and 1200 frames with  $\phi$ -scan from 0-360°, 10 sec/frame exposure time). The frames were integrated using the Bruker SAINT software package and using a narrow-frame integration algorithm. Based on a triclinic crystal system, the integrated frames yielded a total of 84806 reflections at a maximum  $2\theta$  angle of 56.566° (0.75 Å resolution), of which 12812 were independent reflections ( $R_{\text{int}} = 0.0412$ ,  $R_{\text{sig}} = 0.0271$ , redundancy = 6.6, completeness = 99.9%) and 10975 (85.7%) reflections were greater than  $2\sigma(I)$ . The unit cell parameters were,  $\mathbf{a} = 9.9254(2) \text{ \AA}$ ,  $\mathbf{b} = 17.1261(4) \text{ \AA}$ ,  $\mathbf{c} = 17.2860(4) \text{ \AA}$ ,  $\alpha = 65.6882(5)$   $\beta = 84.7287(5)^\circ$ ,  $\gamma = 74.8490(5)$   $V = 2584.27(10) \text{ \AA}^3$ ,  $Z = 2$ , calculated density  $D_c = 1.214 \text{ g/cm}^3$ . Absorption corrections were applied (absorption coefficient  $\mu = 0.428 \text{ mm}^{-1}$ ; min/max transmission = 0.884/0.928) to the raw intensity data using the SADABS program.

The Bruker SHELXTL software package was used for phase determination and structure refinement. The distribution of intensities ( $E^2-1 = 0.894$ ) and no systematic absent reflections indicated two possible space groups, P-1 and P1. The space group P-1 (#2) was later determined to be correct. Direct methods of phase determination followed by two Fourier cycles of refinement led to an electron density map from which most of the non-hydrogen atoms were identified in the asymmetric unit of the unit cell. With subsequent isotropic refinement, all of the non-hydrogen atoms were identified. There was one disordered cation of [Li[C<sub>4</sub>H<sub>8</sub>O]<sub>4</sub>]<sup>+</sup> and one anion of [C<sub>15</sub>H<sub>50</sub>B<sub>22</sub>OP<sub>2</sub>Rh]<sup>-</sup> present in the asymmetric unit of the unit cell. All the THF molecules in the cation were modeled with disorder (THF disordered site occupancy ratios were 64%/36%, 57%/43%, 55%/45% and 55%/45%).

Atomic coordinates, isotropic and anisotropic displacement parameters of all the non-hydrogen atoms were refined by means of a full matrix least-squares procedure on  $F^2$ . The H-atoms were included in the refinement in calculated positions riding on the atoms to which they were attached. The refinement converged at  $R1 = 0.0313$ ,  $wR2 = 0.0741$ , with intensity  $I > 2\sigma(I)$ . The largest peak/hole in the final difference map was 0.683/-0.586 e/Å<sup>3</sup>.

Table 7. Crystal data and structure refinement for vL140JE\_0m.

|                                   |                                                                                     |                  |
|-----------------------------------|-------------------------------------------------------------------------------------|------------------|
| Identification code               | vL140JE_0m                                                                          |                  |
| Empirical formula                 | C <sub>31</sub> H <sub>82</sub> B <sub>22</sub> Li O <sub>5</sub> P <sub>2</sub> Rh |                  |
| Formula weight                    | 944.57                                                                              |                  |
| Temperature                       | 150(2) K                                                                            |                  |
| Wavelength                        | 0.71073 Å                                                                           |                  |
| Crystal system                    | Triclinic                                                                           |                  |
| Space group                       | P -1 (#2)                                                                           |                  |
| Unit cell dimensions              | a = 9.9254(2) Å                                                                     | α = 65.6882(5)°. |
|                                   | b = 17.1261(4) Å                                                                    | β = 84.7287(5)°. |
|                                   | c = 17.2860(4) Å                                                                    | γ = 74.8490(5)°. |
| Volume                            | 2584.27(10) Å <sup>3</sup>                                                          |                  |
| Z                                 | 2                                                                                   |                  |
| Density (calculated)              | 1.214 Mg/m <sup>3</sup>                                                             |                  |
| Absorption coefficient            | 0.428 mm <sup>-1</sup>                                                              |                  |
| F(000)                            | 992                                                                                 |                  |
| Crystal size                      | 0.295 x 0.232 x 0.178 mm <sup>3</sup>                                               |                  |
| Theta range for data collection   | 2.126 to 28.283°.                                                                   |                  |
| Index ranges                      | -13 ≤ h ≤ 13, -22 ≤ k ≤ 22, -23 ≤ l ≤ 23                                            |                  |
| Reflections collected             | 84806                                                                               |                  |
| Independent reflections           | 12812 [R(int) = 0.0412]                                                             |                  |
| Completeness to theta = 25.242°   | 100.0 %                                                                             |                  |
| Absorption correction             | Semi-empirical from equivalents                                                     |                  |
| Refinement method                 | Full-matrix least-squares on F <sup>2</sup>                                         |                  |
| Data / restraints / parameters    | 12812 / 786 / 739                                                                   |                  |
| Goodness-of-fit on F <sup>2</sup> | 1.030                                                                               |                  |
| Final R indices [I > 2σ(I)]       | R1 = 0.0313, wR2 = 0.0741                                                           |                  |
| R indices (all data)              | R1 = 0.0401, wR2 = 0.0790                                                           |                  |
| Extinction coefficient            | n/a                                                                                 |                  |
| Largest diff. peak and hole       | 0.683 and -0.586 e.Å <sup>-3</sup>                                                  |                  |

Table 8. Atomic coordinates ( $\times 10^4$ ) and equivalent isotropic displacement parameters ( $\text{\AA}^2 \times 10^3$ ) for vL140JE\_0m.  $U(\text{eq})$  is defined as one third of the trace of the orthogonalized  $U^{ij}$  tensor.

|        | x        | y        | z       | $U(\text{eq})$ |
|--------|----------|----------|---------|----------------|
| Rh(1)  | -92(1)   | 7376(1)  | 3415(1) | 21(1)          |
| C(1)   | -1765(2) | 7987(1)  | 3625(1) | 36(1)          |
| O(1)   | -2817(2) | 8383(1)  | 3755(1) | 58(1)          |
| P(1A)  | -1090(1) | 6728(1)  | 2762(1) | 19(1)          |
| C(1A)  | 558(2)   | 5994(1)  | 2629(1) | 19(1)          |
| B(2A)  | 1875(2)  | 6257(1)  | 2967(1) | 23(1)          |
| B(3A)  | 1673(2)  | 6501(1)  | 1881(1) | 27(1)          |
| B(4A)  | 1030(2)  | 5645(2)  | 1825(1) | 30(1)          |
| B(5A)  | 870(2)   | 4879(1)  | 2884(1) | 26(1)          |
| B(6A)  | 1395(2)  | 5262(1)  | 3595(1) | 23(1)          |
| B(7A)  | 3192(2)  | 5272(1)  | 3425(1) | 28(1)          |
| B(8A)  | 3348(2)  | 6041(1)  | 2364(2) | 30(1)          |
| B(9A)  | 2822(2)  | 5648(2)  | 1659(1) | 34(1)          |
| B(10A) | 2334(2)  | 4640(2)  | 2282(2) | 33(1)          |
| B(11A) | 2564(2)  | 4407(1)  | 3373(1) | 29(1)          |
| B(12A) | 3772(2)  | 4885(1)  | 2611(2) | 31(1)          |
| C(2A)  | -2179(2) | 5958(1)  | 3381(1) | 26(1)          |
| C(3A)  | -3219(2) | 6298(1)  | 3955(2) | 43(1)          |
| C(4A)  | -2868(2) | 5656(1)  | 2834(2) | 40(1)          |
| C(5A)  | -2016(2) | 7435(1)  | 1725(1) | 38(1)          |
| C(6A)  | -3455(2) | 7949(2)  | 1882(2) | 51(1)          |
| C(7A)  | -1295(3) | 8075(2)  | 1076(2) | 89(1)          |
| P(1B)  | 1113(1)  | 7960(1)  | 4086(1) | 21(1)          |
| C(1B)  | 1504(2)  | 8995(1)  | 3286(1) | 21(1)          |
| B(2B)  | 3168(2)  | 9011(2)  | 2888(1) | 30(1)          |
| B(3B)  | 2381(2)  | 9648(2)  | 3478(1) | 31(1)          |
| B(4B)  | 556(2)   | 10011(1) | 3245(1) | 28(1)          |
| B(5B)  | 214(2)   | 9611(1)  | 2507(1) | 27(1)          |
| B(6B)  | 1822(2)  | 8990(1)  | 2286(1) | 26(1)          |
| B(7B)  | 2924(2)  | 9716(2)  | 1795(1) | 34(1)          |
| B(8B)  | 3259(3)  | 10127(2) | 2533(2) | 38(1)          |

|        |          |          |          |       |
|--------|----------|----------|----------|-------|
| B(9B)  | 1648(3)  | 10743(2) | 2753(2)  | 38(1) |
| B(10B) | 309(3)   | 10715(2) | 2154(2)  | 38(1) |
| B(11B) | 1097(3)  | 10083(2) | 1558(1)  | 34(1) |
| B(12B) | 1981(3)  | 10789(2) | 1710(2)  | 39(1) |
| C(2B)  | 46(2)    | 8239(1)  | 4920(1)  | 31(1) |
| C(3B)  | -512(3)  | 7452(2)  | 5540(1)  | 51(1) |
| C(4B)  | 671(3)   | 8623(2)  | 5415(1)  | 43(1) |
| C(5B)  | 2808(2)  | 7169(1)  | 4529(1)  | 32(1) |
| C(6B)  | 3763(2)  | 7410(2)  | 4999(2)  | 47(1) |
| C(7B)  | 2582(3)  | 6248(1)  | 5090(1)  | 47(1) |
| Li(1)  | 6367(3)  | 2298(2)  | 1534(2)  | 40(1) |
| O(1T)  | 7658(13) | 3002(9)  | 1462(8)  | 37(2) |
| C(1T)  | 8677(14) | 3257(11) | 822(9)   | 53(3) |
| C(2T)  | 9695(10) | 3456(6)  | 1271(6)  | 76(2) |
| C(3T)  | 8843(10) | 3717(5)  | 1939(5)  | 81(2) |
| C(4T)  | 8039(10) | 3005(6)  | 2244(6)  | 56(2) |
| O(1D)  | 7640(19) | 3033(13) | 1399(12) | 44(3) |
| C(1D)  | 8827(18) | 3193(13) | 863(12)  | 47(3) |
| C(2D)  | 9471(16) | 3808(8)  | 1049(7)  | 76(3) |
| C(3D)  | 9347(13) | 3378(8)  | 2008(7)  | 78(3) |
| C(4D)  | 7857(13) | 3285(10) | 2070(10) | 67(3) |
| O(2T)  | 6940(20) | 1501(8)  | 982(9)   | 37(2) |
| C(5T)  | 7445(15) | 1802(9)  | 129(7)   | 55(3) |
| C(6T)  | 6814(11) | 1431(5)  | -344(5)  | 70(2) |
| C(7T)  | 6237(6)  | 722(4)   | 308(3)   | 44(1) |
| C(8T)  | 6719(12) | 656(7)   | 1139(5)  | 42(2) |
| O(2D)  | 6750(40) | 1519(16) | 955(17)  | 42(5) |
| C(5D)  | 7490(20) | 1832(13) | 177(13)  | 41(3) |
| C(6D)  | 7420(20) | 1231(10) | -230(9)  | 83(4) |
| C(7D)  | 6980(30) | 465(10)  | 413(8)   | 90(4) |
| C(8D)  | 6450(20) | 685(13)  | 1152(10) | 56(4) |
| O(3T)  | 5766(16) | 1710(8)  | 2664(5)  | 40(2) |
| C(9T)  | 6653(13) | 945(8)   | 3298(7)  | 44(2) |
| C(10T) | 5737(10) | 543(6)   | 4018(6)  | 45(2) |
| C(11T) | 4643(15) | 1353(8)  | 3979(8)  | 60(3) |
| C(12T) | 4492(8)  | 1971(6)  | 3054(6)  | 44(2) |

|        |          |          |          |       |
|--------|----------|----------|----------|-------|
| O(3D)  | 5910(20) | 1718(10) | 2704(6)  | 42(3) |
| C(9D)  | 6580(16) | 814(9)   | 3232(7)  | 42(3) |
| C(10D) | 5984(12) | 738(9)   | 4087(7)  | 50(2) |
| C(11D) | 4520(15) | 1325(9)  | 3908(10) | 48(3) |
| C(12D) | 4838(12) | 2096(8)  | 3157(7)  | 46(2) |
| O(4D)  | 4622(7)  | 3122(4)  | 1032(6)  | 42(2) |
| C(13T) | 4577(8)  | 4030(4)  | 560(5)   | 38(1) |
| C(14T) | 3265(6)  | 4398(4)  | 14(4)    | 73(2) |
| C(15T) | 3201(11) | 3614(5)  | -187(5)  | 99(3) |
| C(16T) | 3590(14) | 2857(8)  | 689(6)   | 84(2) |
| O(4T)  | 4762(9)  | 3099(5)  | 852(8)   | 53(3) |
| C(13D) | 4308(13) | 3980(6)  | 338(6)   | 53(2) |
| C(14D) | 3515(11) | 3942(6)  | -361(6)  | 73(2) |
| C(15D) | 3176(11) | 3055(5)  | 94(4)    | 75(2) |
| C(16D) | 3545(17) | 2711(11) | 1036(6)  | 84(2) |

---

Table 9. Bond lengths [ $\text{\AA}$ ] and angles [ $^\circ$ ] for vL140JE\_0m.

---

|              |            |
|--------------|------------|
| Rh(1)-C(1)   | 1.8113(19) |
| Rh(1)-P(1A)  | 2.3017(4)  |
| Rh(1)-P(1B)  | 2.3686(4)  |
| Rh(1)-B(2A)  | 2.6592(19) |
| C(1)-O(1)    | 1.145(2)   |
| P(1A)-C(1A)  | 1.8451(16) |
| P(1A)-C(2A)  | 1.8503(17) |
| P(1A)-C(5A)  | 1.8588(19) |
| C(1A)-B(2A)  | 1.708(2)   |
| C(1A)-B(4A)  | 1.711(3)   |
| C(1A)-B(5A)  | 1.719(2)   |
| C(1A)-B(3A)  | 1.722(2)   |
| C(1A)-B(6A)  | 1.743(2)   |
| B(2A)-B(8A)  | 1.764(3)   |
| B(2A)-B(6A)  | 1.765(3)   |
| B(2A)-B(3A)  | 1.765(3)   |
| B(2A)-B(7A)  | 1.767(3)   |
| B(2A)-H(2A)  | 1.1200     |
| B(3A)-B(9A)  | 1.760(3)   |
| B(3A)-B(8A)  | 1.764(3)   |
| B(3A)-B(4A)  | 1.785(3)   |
| B(3A)-H(3A)  | 1.1200     |
| B(4A)-B(9A)  | 1.776(3)   |
| B(4A)-B(10A) | 1.779(3)   |
| B(4A)-B(5A)  | 1.783(3)   |
| B(4A)-H(4A)  | 1.1200     |
| B(5A)-B(10A) | 1.768(3)   |
| B(5A)-B(6A)  | 1.779(3)   |
| B(5A)-B(11A) | 1.783(3)   |
| B(5A)-H(5A)  | 1.1200     |
| B(6A)-B(11A) | 1.769(3)   |
| B(6A)-B(7A)  | 1.784(3)   |
| B(6A)-H(6A)  | 1.1200     |
| B(7A)-B(12A) | 1.781(3)   |



|               |            |
|---------------|------------|
| B(7A)-B(8A)   | 1.785(3)   |
| B(7A)-B(11A)  | 1.787(3)   |
| B(7A)-H(7A)   | 1.1200     |
| B(8A)-B(12A)  | 1.784(3)   |
| B(8A)-B(9A)   | 1.787(3)   |
| B(8A)-H(8A)   | 1.1200     |
| B(9A)-B(12A)  | 1.783(3)   |
| B(9A)-B(10A)  | 1.784(3)   |
| B(9A)-H(9A)   | 1.1200     |
| B(10A)-B(11A) | 1.782(3)   |
| B(10A)-B(12A) | 1.787(3)   |
| B(10A)-H(10A) | 1.1200     |
| B(11A)-B(12A) | 1.782(3)   |
| B(11A)-H(11A) | 1.1200     |
| B(12A)-H(12A) | 1.1200     |
| C(2A)-C(4A)   | 1.528(3)   |
| C(2A)-C(3A)   | 1.536(3)   |
| C(2A)-H(2C)   | 1.0000     |
| C(3A)-H(3C)   | 0.9800     |
| C(3A)-H(3D)   | 0.9800     |
| C(3A)-H(3E)   | 0.9800     |
| C(4A)-H(4C)   | 0.9800     |
| C(4A)-H(4D)   | 0.9800     |
| C(4A)-H(4E)   | 0.9800     |
| C(5A)-C(7A)   | 1.491(3)   |
| C(5A)-C(6A)   | 1.535(3)   |
| C(5A)-H(5C)   | 1.0000     |
| C(6A)-H(6C)   | 0.9800     |
| C(6A)-H(6D)   | 0.9800     |
| C(6A)-H(6E)   | 0.9800     |
| C(7A)-H(7C)   | 0.9800     |
| C(7A)-H(7D)   | 0.9800     |
| C(7A)-H(7E)   | 0.9800     |
| P(1B)-C(5B)   | 1.8552(18) |
| P(1B)-C(1B)   | 1.8569(17) |
| P(1B)-C(2B)   | 1.8576(18) |

|               |          |
|---------------|----------|
| C(1B)-B(4B)   | 1.725(3) |
| C(1B)-B(3B)   | 1.729(3) |
| C(1B)-B(6B)   | 1.730(2) |
| C(1B)-B(2B)   | 1.732(3) |
| C(1B)-B(5B)   | 1.734(3) |
| B(2B)-B(7B)   | 1.771(3) |
| B(2B)-B(8B)   | 1.776(3) |
| B(2B)-B(3B)   | 1.781(3) |
| B(2B)-B(6B)   | 1.783(3) |
| B(2B)-H(2B)   | 1.1200   |
| B(3B)-B(8B)   | 1.764(3) |
| B(3B)-B(9B)   | 1.771(3) |
| B(3B)-B(4B)   | 1.779(3) |
| B(3B)-H(3B)   | 1.1200   |
| B(4B)-B(10B)  | 1.769(3) |
| B(4B)-B(9B)   | 1.769(3) |
| B(4B)-B(5B)   | 1.771(3) |
| B(4B)-H(4B)   | 1.1200   |
| B(5B)-B(10B)  | 1.758(3) |
| B(5B)-B(11B)  | 1.767(3) |
| B(5B)-B(6B)   | 1.777(3) |
| B(5B)-H(5B)   | 1.1200   |
| B(6B)-B(11B)  | 1.769(3) |
| B(6B)-B(7B)   | 1.771(3) |
| B(6B)-H(6B)   | 1.1200   |
| B(7B)-B(8B)   | 1.781(3) |
| B(7B)-B(12B)  | 1.783(3) |
| B(7B)-B(11B)  | 1.783(3) |
| B(7B)-H(7B)   | 1.1200   |
| B(8B)-B(9B)   | 1.775(3) |
| B(8B)-B(12B)  | 1.781(4) |
| B(8B)-H(8B)   | 1.1200   |
| B(9B)-B(12B)  | 1.776(3) |
| B(9B)-B(10B)  | 1.779(4) |
| B(9B)-H(9B)   | 1.1200   |
| B(10B)-B(12B) | 1.776(3) |

|               |          |
|---------------|----------|
| B(10B)-B(11B) | 1.781(3) |
| B(10B)-H(10B) | 1.1200   |
| B(11B)-B(12B) | 1.778(3) |
| B(11B)-H(11B) | 1.1200   |
| B(12B)-H(12B) | 1.1200   |
| C(2B)-C(4B)   | 1.525(3) |
| C(2B)-C(3B)   | 1.536(3) |
| C(2B)-H(2D)   | 1.0000   |
| C(3B)-H(3F)   | 0.9800   |
| C(3B)-H(3G)   | 0.9800   |
| C(3B)-H(3H)   | 0.9800   |
| C(4B)-H(4F)   | 0.9800   |
| C(4B)-H(4G)   | 0.9800   |
| C(4B)-H(4H)   | 0.9800   |
| C(5B)-C(6B)   | 1.533(3) |
| C(5B)-C(7B)   | 1.537(3) |
| C(5B)-H(5D)   | 1.0000   |
| C(6B)-H(6F)   | 0.9800   |
| C(6B)-H(6G)   | 0.9800   |
| C(6B)-H(6H)   | 0.9800   |
| C(7B)-H(7F)   | 0.9800   |
| C(7B)-H(7G)   | 0.9800   |
| C(7B)-H(7H)   | 0.9800   |
| Li(1)-O(2T)   | 1.913(5) |
| Li(1)-O(3T)   | 1.915(5) |
| Li(1)-O(4T)   | 1.918(6) |
| Li(1)-O(2D)   | 1.920(7) |
| Li(1)-O(3D)   | 1.922(6) |
| Li(1)-O(4D)   | 1.932(6) |
| Li(1)-O(1T)   | 1.942(5) |
| Li(1)-O(1D)   | 1.942(6) |
| O(1T)-C(1T)   | 1.437(6) |
| O(1T)-C(4T)   | 1.440(6) |
| C(1T)-C(2T)   | 1.511(7) |
| C(1T)-H(1A)   | 0.9900   |
| C(1T)-H(1B)   | 0.9900   |

|             |          |
|-------------|----------|
| C(2T)-C(3T) | 1.515(7) |
| C(2T)-H(2E) | 0.9900   |
| C(2T)-H(2F) | 0.9900   |
| C(3T)-C(4T) | 1.519(6) |
| C(3T)-H(3I) | 0.9900   |
| C(3T)-H(3J) | 0.9900   |
| C(4T)-H(4I) | 0.9900   |
| C(4T)-H(4J) | 0.9900   |
| O(1D)-C(1D) | 1.443(6) |
| O(1D)-C(4D) | 1.444(7) |
| C(1D)-C(2D) | 1.513(7) |
| C(1D)-H(1C) | 0.9900   |
| C(1D)-H(1D) | 0.9900   |
| C(2D)-C(3D) | 1.521(7) |
| C(2D)-H(2G) | 0.9900   |
| C(2D)-H(2H) | 0.9900   |
| C(3D)-C(4D) | 1.517(7) |
| C(3D)-H(3K) | 0.9900   |
| C(3D)-H(3L) | 0.9900   |
| C(4D)-H(4K) | 0.9900   |
| C(4D)-H(4L) | 0.9900   |
| O(2T)-C(8T) | 1.429(5) |
| O(2T)-C(5T) | 1.438(5) |
| C(5T)-C(6T) | 1.481(6) |
| C(5T)-H(5E) | 0.9900   |
| C(5T)-H(5F) | 0.9900   |
| C(6T)-C(7T) | 1.481(5) |
| C(6T)-H(6I) | 0.9900   |
| C(6T)-H(6J) | 0.9900   |
| C(7T)-C(8T) | 1.508(6) |
| C(7T)-H(7I) | 0.9900   |
| C(7T)-H(7J) | 0.9900   |
| C(8T)-H(8C) | 0.9900   |
| C(8T)-H(8D) | 0.9900   |
| O(2D)-C(8D) | 1.433(7) |
| O(2D)-C(5D) | 1.437(7) |

|               |          |
|---------------|----------|
| C(5D)-C(6D)   | 1.486(7) |
| C(5D)-H(5G)   | 0.9900   |
| C(5D)-H(5H)   | 0.9900   |
| C(6D)-C(7D)   | 1.466(7) |
| C(6D)-H(6K)   | 0.9900   |
| C(6D)-H(6L)   | 0.9900   |
| C(7D)-C(8D)   | 1.491(8) |
| C(7D)-H(7K)   | 0.9900   |
| C(7D)-H(7L)   | 0.9900   |
| C(8D)-H(8E)   | 0.9900   |
| C(8D)-H(8F)   | 0.9900   |
| O(3T)-C(12T)  | 1.432(6) |
| O(3T)-C(9T)   | 1.444(6) |
| C(9T)-C(10T)  | 1.504(7) |
| C(9T)-H(9C)   | 0.9900   |
| C(9T)-H(9D)   | 0.9900   |
| C(10T)-C(11T) | 1.501(7) |
| C(10T)-H(10C) | 0.9900   |
| C(10T)-H(10D) | 0.9900   |
| C(11T)-C(12T) | 1.505(7) |
| C(11T)-H(11C) | 0.9900   |
| C(11T)-H(11D) | 0.9900   |
| C(12T)-H(12C) | 0.9900   |
| C(12T)-H(12D) | 0.9900   |
| O(3D)-C(12D)  | 1.440(6) |
| O(3D)-C(9D)   | 1.443(7) |
| C(9D)-C(10D)  | 1.507(7) |
| C(9D)-H(9E)   | 0.9900   |
| C(9D)-H(9F)   | 0.9900   |
| C(10D)-C(11D) | 1.510(8) |
| C(10D)-H(10E) | 0.9900   |
| C(10D)-H(10F) | 0.9900   |
| C(11D)-C(12D) | 1.504(8) |
| C(11D)-H(11E) | 0.9900   |
| C(11D)-H(11F) | 0.9900   |
| C(12D)-H(12E) | 0.9900   |

|                   |             |
|-------------------|-------------|
| C(12D)-H(12F)     | 0.9900      |
| O(4D)-C(13T)      | 1.418(13)   |
| O(4D)-C(16T)      | 1.478(14)   |
| C(13T)-C(14T)     | 1.515(6)    |
| C(13T)-H(13A)     | 0.9900      |
| C(13T)-H(13B)     | 0.9900      |
| C(14T)-C(15T)     | 1.537(6)    |
| C(14T)-H(14A)     | 0.9900      |
| C(14T)-H(14B)     | 0.9900      |
| C(15T)-C(16T)     | 1.533(7)    |
| C(15T)-H(15A)     | 0.9900      |
| C(15T)-H(15B)     | 0.9900      |
| C(16T)-H(16A)     | 0.9900      |
| C(16T)-H(16B)     | 0.9900      |
| O(4T)-C(13D)      | 1.373(15)   |
| O(4T)-C(16D)      | 1.476(19)   |
| C(13D)-C(14D)     | 1.532(7)    |
| C(13D)-H(13C)     | 0.9900      |
| C(13D)-H(13D)     | 0.9900      |
| C(14D)-C(15D)     | 1.508(7)    |
| C(14D)-H(14C)     | 0.9900      |
| C(14D)-H(14D)     | 0.9900      |
| C(15D)-C(16D)     | 1.529(7)    |
| C(15D)-H(15C)     | 0.9900      |
| C(15D)-H(15D)     | 0.9900      |
| C(16D)-H(16C)     | 0.9900      |
| C(16D)-H(16D)     | 0.9900      |
|                   |             |
| C(1)-Rh(1)-P(1A)  | 93.17(6)    |
| C(1)-Rh(1)-P(1B)  | 91.49(6)    |
| P(1A)-Rh(1)-P(1B) | 175.255(15) |
| C(1)-Rh(1)-B(2A)  | 162.83(7)   |
| P(1A)-Rh(1)-B(2A) | 69.84(4)    |
| P(1B)-Rh(1)-B(2A) | 105.46(4)   |
| O(1)-C(1)-Rh(1)   | 179.15(17)  |
| C(1A)-P(1A)-C(2A) | 103.71(7)   |

|                   |            |
|-------------------|------------|
| C(1A)-P(1A)-C(5A) | 111.04(8)  |
| C(2A)-P(1A)-C(5A) | 106.07(9)  |
| C(1A)-P(1A)-Rh(1) | 95.77(5)   |
| C(2A)-P(1A)-Rh(1) | 119.83(6)  |
| C(5A)-P(1A)-Rh(1) | 118.75(7)  |
| B(2A)-C(1A)-B(4A) | 113.42(13) |
| B(2A)-C(1A)-B(5A) | 112.42(12) |
| B(4A)-C(1A)-B(5A) | 62.64(12)  |
| B(2A)-C(1A)-B(3A) | 61.93(11)  |
| B(4A)-C(1A)-B(3A) | 62.67(12)  |
| B(5A)-C(1A)-B(3A) | 113.65(13) |
| B(2A)-C(1A)-B(6A) | 61.51(10)  |
| B(4A)-C(1A)-B(6A) | 113.60(13) |
| B(5A)-C(1A)-B(6A) | 61.86(11)  |
| B(3A)-C(1A)-B(6A) | 112.86(12) |
| B(2A)-C(1A)-P(1A) | 106.86(10) |
| B(4A)-C(1A)-P(1A) | 128.99(11) |
| B(5A)-C(1A)-P(1A) | 126.81(11) |
| B(3A)-C(1A)-P(1A) | 115.94(11) |
| B(6A)-C(1A)-P(1A) | 112.51(11) |
| C(1A)-B(2A)-B(8A) | 106.44(14) |
| C(1A)-B(2A)-B(6A) | 60.20(10)  |
| B(8A)-B(2A)-B(6A) | 109.59(14) |
| C(1A)-B(2A)-B(3A) | 59.41(10)  |
| B(8A)-B(2A)-B(3A) | 59.97(11)  |
| B(6A)-B(2A)-B(3A) | 109.72(14) |
| C(1A)-B(2A)-B(7A) | 107.26(13) |
| B(8A)-B(2A)-B(7A) | 60.73(11)  |
| B(6A)-B(2A)-B(7A) | 60.69(11)  |
| B(3A)-B(2A)-B(7A) | 109.17(14) |
| C(1A)-B(2A)-Rh(1) | 87.26(9)   |
| B(8A)-B(2A)-Rh(1) | 150.82(12) |
| B(6A)-B(2A)-Rh(1) | 99.58(10)  |
| B(3A)-B(2A)-Rh(1) | 109.91(10) |
| B(7A)-B(2A)-Rh(1) | 140.38(12) |
| C(1A)-B(2A)-H(2A) | 123.1      |

|                    |            |
|--------------------|------------|
| B(8A)-B(2A)-H(2A)  | 121.7      |
| B(6A)-B(2A)-H(2A)  | 120.2      |
| B(3A)-B(2A)-H(2A)  | 121.0      |
| B(7A)-B(2A)-H(2A)  | 121.2      |
| C(1A)-B(3A)-B(9A)  | 105.11(14) |
| C(1A)-B(3A)-B(8A)  | 105.87(14) |
| B(9A)-B(3A)-B(8A)  | 60.93(12)  |
| C(1A)-B(3A)-B(2A)  | 58.66(10)  |
| B(9A)-B(3A)-B(2A)  | 107.93(14) |
| B(8A)-B(3A)-B(2A)  | 59.99(11)  |
| C(1A)-B(3A)-B(4A)  | 58.35(11)  |
| B(9A)-B(3A)-B(4A)  | 60.13(12)  |
| B(8A)-B(3A)-B(4A)  | 109.06(14) |
| B(2A)-B(3A)-B(4A)  | 107.22(14) |
| C(1A)-B(3A)-H(3A)  | 124.5      |
| B(9A)-B(3A)-H(3A)  | 122.0      |
| B(8A)-B(3A)-H(3A)  | 121.3      |
| B(2A)-B(3A)-H(3A)  | 122.0      |
| B(4A)-B(3A)-H(3A)  | 121.6      |
| C(1A)-B(4A)-B(9A)  | 104.90(14) |
| C(1A)-B(4A)-B(10A) | 104.87(14) |
| B(9A)-B(4A)-B(10A) | 60.23(12)  |
| C(1A)-B(4A)-B(5A)  | 58.91(11)  |
| B(9A)-B(4A)-B(5A)  | 107.68(15) |
| B(10A)-B(4A)-B(5A) | 59.50(12)  |
| C(1A)-B(4A)-B(3A)  | 58.98(11)  |
| B(9A)-B(4A)-B(3A)  | 59.24(12)  |
| B(10A)-B(4A)-B(3A) | 107.32(15) |
| B(5A)-B(4A)-B(3A)  | 107.66(14) |
| C(1A)-B(4A)-H(4A)  | 124.3      |
| B(9A)-B(4A)-H(4A)  | 122.5      |
| B(10A)-B(4A)-H(4A) | 122.6      |
| B(5A)-B(4A)-H(4A)  | 121.7      |
| B(3A)-B(4A)-H(4A)  | 122.0      |
| C(1A)-B(5A)-B(10A) | 105.01(14) |
| C(1A)-B(5A)-B(6A)  | 59.72(10)  |



|                     |            |
|---------------------|------------|
| B(10A)-B(5A)-B(6A)  | 107.95(14) |
| C(1A)-B(5A)-B(4A)   | 58.45(11)  |
| B(10A)-B(5A)-B(4A)  | 60.15(12)  |
| B(6A)-B(5A)-B(4A)   | 108.43(14) |
| C(1A)-B(5A)-B(11A)  | 105.43(13) |
| B(10A)-B(5A)-B(11A) | 60.24(12)  |
| B(6A)-B(5A)-B(11A)  | 59.53(11)  |
| B(4A)-B(5A)-B(11A)  | 108.37(14) |
| C(1A)-B(5A)-H(5A)   | 124.2      |
| B(10A)-B(5A)-H(5A)  | 122.3      |
| B(6A)-B(5A)-H(5A)   | 121.3      |
| B(4A)-B(5A)-H(5A)   | 121.4      |
| B(11A)-B(5A)-H(5A)  | 122.2      |
| C(1A)-B(6A)-B(2A)   | 58.29(10)  |
| C(1A)-B(6A)-B(11A)  | 105.05(13) |
| B(2A)-B(6A)-B(11A)  | 107.51(14) |
| C(1A)-B(6A)-B(5A)   | 58.42(10)  |
| B(2A)-B(6A)-B(5A)   | 106.97(14) |
| B(11A)-B(6A)-B(5A)  | 60.34(11)  |
| C(1A)-B(6A)-B(7A)   | 105.02(13) |
| B(2A)-B(6A)-B(7A)   | 59.71(11)  |
| B(11A)-B(6A)-B(7A)  | 60.40(11)  |
| B(5A)-B(6A)-B(7A)   | 108.47(14) |
| C(1A)-B(6A)-H(6A)   | 124.7      |
| B(2A)-B(6A)-H(6A)   | 122.3      |
| B(11A)-B(6A)-H(6A)  | 122.1      |
| B(5A)-B(6A)-H(6A)   | 121.6      |
| B(7A)-B(6A)-H(6A)   | 121.9      |
| B(2A)-B(7A)-B(12A)  | 106.82(14) |
| B(2A)-B(7A)-B(6A)   | 59.60(10)  |
| B(12A)-B(7A)-B(6A)  | 107.30(14) |
| B(2A)-B(7A)-B(8A)   | 59.57(11)  |
| B(12A)-B(7A)-B(8A)  | 60.05(12)  |
| B(6A)-B(7A)-B(8A)   | 107.79(13) |
| B(2A)-B(7A)-B(11A)  | 106.62(13) |
| B(12A)-B(7A)-B(11A) | 59.93(12)  |

|                     |            |
|---------------------|------------|
| B(6A)-B(7A)-B(11A)  | 59.37(11)  |
| B(8A)-B(7A)-B(11A)  | 107.95(15) |
| B(2A)-B(7A)-H(7A)   | 122.7      |
| B(12A)-B(7A)-H(7A)  | 122.1      |
| B(6A)-B(7A)-H(7A)   | 122.1      |
| B(8A)-B(7A)-H(7A)   | 121.6      |
| B(11A)-B(7A)-H(7A)  | 122.2      |
| B(3A)-B(8A)-B(2A)   | 60.03(11)  |
| B(3A)-B(8A)-B(12A)  | 107.53(15) |
| B(2A)-B(8A)-B(12A)  | 106.76(14) |
| B(3A)-B(8A)-B(7A)   | 108.38(14) |
| B(2A)-B(8A)-B(7A)   | 59.70(11)  |
| B(12A)-B(8A)-B(7A)  | 59.85(12)  |
| B(3A)-B(8A)-B(9A)   | 59.43(12)  |
| B(2A)-B(8A)-B(9A)   | 106.78(14) |
| B(12A)-B(8A)-B(9A)  | 59.88(12)  |
| B(7A)-B(8A)-B(9A)   | 107.87(15) |
| B(3A)-B(8A)-H(8A)   | 121.6      |
| B(2A)-B(8A)-H(8A)   | 122.6      |
| B(12A)-B(8A)-H(8A)  | 122.2      |
| B(7A)-B(8A)-H(8A)   | 121.5      |
| B(9A)-B(8A)-H(8A)   | 122.2      |
| B(3A)-B(9A)-B(4A)   | 60.62(12)  |
| B(3A)-B(9A)-B(12A)  | 107.77(15) |
| B(4A)-B(9A)-B(12A)  | 108.30(16) |
| B(3A)-B(9A)-B(10A)  | 108.19(14) |
| B(4A)-B(9A)-B(10A)  | 59.96(12)  |
| B(12A)-B(9A)-B(10A) | 60.13(13)  |
| B(3A)-B(9A)-B(8A)   | 59.63(12)  |
| B(4A)-B(9A)-B(8A)   | 108.42(14) |
| B(12A)-B(9A)-B(8A)  | 59.98(12)  |
| B(10A)-B(9A)-B(8A)  | 108.10(16) |
| B(3A)-B(9A)-H(9A)   | 121.7      |
| B(4A)-B(9A)-H(9A)   | 121.3      |
| B(12A)-B(9A)-H(9A)  | 121.7      |
| B(10A)-B(9A)-H(9A)  | 121.6      |

|                      |            |
|----------------------|------------|
| B(8A)-B(9A)-H(9A)    | 121.7      |
| B(5A)-B(10A)-B(4A)   | 60.35(11)  |
| B(5A)-B(10A)-B(11A)  | 60.31(12)  |
| B(4A)-B(10A)-B(11A)  | 108.59(14) |
| B(5A)-B(10A)-B(9A)   | 108.01(14) |
| B(4A)-B(10A)-B(9A)   | 59.81(12)  |
| B(11A)-B(10A)-B(9A)  | 107.96(15) |
| B(5A)-B(10A)-B(12A)  | 108.10(15) |
| B(4A)-B(10A)-B(12A)  | 107.98(15) |
| B(11A)-B(10A)-B(12A) | 59.91(12)  |
| B(9A)-B(10A)-B(12A)  | 59.89(13)  |
| B(5A)-B(10A)-H(10A)  | 121.5      |
| B(4A)-B(10A)-H(10A)  | 121.5      |
| B(11A)-B(10A)-H(10A) | 121.5      |
| B(9A)-B(10A)-H(10A)  | 121.9      |
| B(12A)-B(10A)-H(10A) | 121.8      |
| B(6A)-B(11A)-B(10A)  | 107.79(14) |
| B(6A)-B(11A)-B(12A)  | 107.92(14) |
| B(10A)-B(11A)-B(12A) | 60.18(13)  |
| B(6A)-B(11A)-B(5A)   | 60.12(11)  |
| B(10A)-B(11A)-B(5A)  | 59.45(12)  |
| B(12A)-B(11A)-B(5A)  | 107.62(15) |
| B(6A)-B(11A)-B(7A)   | 60.23(11)  |
| B(10A)-B(11A)-B(7A)  | 108.11(15) |
| B(12A)-B(11A)-B(7A)  | 59.85(12)  |
| B(5A)-B(11A)-B(7A)   | 108.16(13) |
| B(6A)-B(11A)-H(11A)  | 121.7      |
| B(10A)-B(11A)-H(11A) | 121.9      |
| B(12A)-B(11A)-H(11A) | 121.9      |
| B(5A)-B(11A)-H(11A)  | 121.9      |
| B(7A)-B(11A)-H(11A)  | 121.5      |
| B(7A)-B(12A)-B(11A)  | 60.22(12)  |
| B(7A)-B(12A)-B(9A)   | 108.28(14) |
| B(11A)-B(12A)-B(9A)  | 108.03(14) |
| B(7A)-B(12A)-B(8A)   | 60.10(12)  |
| B(11A)-B(12A)-B(8A)  | 108.21(14) |

|                      |            |
|----------------------|------------|
| B(9A)-B(12A)-B(8A)   | 60.14(13)  |
| B(7A)-B(12A)-B(10A)  | 108.18(14) |
| B(11A)-B(12A)-B(10A) | 59.90(12)  |
| B(9A)-B(12A)-B(10A)  | 59.98(13)  |
| B(8A)-B(12A)-B(10A)  | 108.10(14) |
| B(7A)-B(12A)-H(12A)  | 121.5      |
| B(11A)-B(12A)-H(12A) | 121.7      |
| B(9A)-B(12A)-H(12A)  | 121.6      |
| B(8A)-B(12A)-H(12A)  | 121.6      |
| B(10A)-B(12A)-H(12A) | 121.7      |
| C(4A)-C(2A)-C(3A)    | 112.78(16) |
| C(4A)-C(2A)-P(1A)    | 112.97(13) |
| C(3A)-C(2A)-P(1A)    | 113.21(13) |
| C(4A)-C(2A)-H(2C)    | 105.7      |
| C(3A)-C(2A)-H(2C)    | 105.7      |
| P(1A)-C(2A)-H(2C)    | 105.7      |
| C(2A)-C(3A)-H(3C)    | 109.5      |
| C(2A)-C(3A)-H(3D)    | 109.5      |
| H(3C)-C(3A)-H(3D)    | 109.5      |
| C(2A)-C(3A)-H(3E)    | 109.5      |
| H(3C)-C(3A)-H(3E)    | 109.5      |
| H(3D)-C(3A)-H(3E)    | 109.5      |
| C(2A)-C(4A)-H(4C)    | 109.5      |
| C(2A)-C(4A)-H(4D)    | 109.5      |
| H(4C)-C(4A)-H(4D)    | 109.5      |
| C(2A)-C(4A)-H(4E)    | 109.5      |
| H(4C)-C(4A)-H(4E)    | 109.5      |
| H(4D)-C(4A)-H(4E)    | 109.5      |
| C(7A)-C(5A)-C(6A)    | 108.46(19) |
| C(7A)-C(5A)-P(1A)    | 116.85(17) |
| C(6A)-C(5A)-P(1A)    | 108.96(14) |
| C(7A)-C(5A)-H(5C)    | 107.4      |
| C(6A)-C(5A)-H(5C)    | 107.4      |
| P(1A)-C(5A)-H(5C)    | 107.4      |
| C(5A)-C(6A)-H(6C)    | 109.5      |
| C(5A)-C(6A)-H(6D)    | 109.5      |

|                   |            |
|-------------------|------------|
| H(6C)-C(6A)-H(6D) | 109.5      |
| C(5A)-C(6A)-H(6E) | 109.5      |
| H(6C)-C(6A)-H(6E) | 109.5      |
| H(6D)-C(6A)-H(6E) | 109.5      |
| C(5A)-C(7A)-H(7C) | 109.5      |
| C(5A)-C(7A)-H(7D) | 109.5      |
| H(7C)-C(7A)-H(7D) | 109.5      |
| C(5A)-C(7A)-H(7E) | 109.5      |
| H(7C)-C(7A)-H(7E) | 109.5      |
| H(7D)-C(7A)-H(7E) | 109.5      |
| C(5B)-P(1B)-C(1B) | 107.25(8)  |
| C(5B)-P(1B)-C(2B) | 111.17(9)  |
| C(1B)-P(1B)-C(2B) | 107.45(8)  |
| C(5B)-P(1B)-Rh(1) | 109.92(6)  |
| C(1B)-P(1B)-Rh(1) | 109.29(5)  |
| C(2B)-P(1B)-Rh(1) | 111.62(6)  |
| B(4B)-C(1B)-B(3B) | 62.01(12)  |
| B(4B)-C(1B)-B(6B) | 112.35(13) |
| B(3B)-C(1B)-B(6B) | 112.53(13) |
| B(4B)-C(1B)-B(2B) | 112.79(14) |
| B(3B)-C(1B)-B(2B) | 61.92(11)  |
| B(6B)-C(1B)-B(2B) | 61.98(11)  |
| B(4B)-C(1B)-B(5B) | 61.57(11)  |
| B(3B)-C(1B)-B(5B) | 112.29(14) |
| B(6B)-C(1B)-B(5B) | 61.73(11)  |
| B(2B)-C(1B)-B(5B) | 112.52(14) |
| B(4B)-C(1B)-P(1B) | 120.66(11) |
| B(3B)-C(1B)-P(1B) | 125.92(12) |
| B(6B)-C(1B)-P(1B) | 113.57(11) |
| B(2B)-C(1B)-P(1B) | 121.00(12) |
| B(5B)-C(1B)-P(1B) | 113.47(11) |
| C(1B)-B(2B)-B(7B) | 105.44(15) |
| C(1B)-B(2B)-B(8B) | 105.11(14) |
| B(7B)-B(2B)-B(8B) | 60.27(13)  |
| C(1B)-B(2B)-B(3B) | 58.95(11)  |
| B(7B)-B(2B)-B(3B) | 107.78(16) |

|                    |            |
|--------------------|------------|
| B(8B)-B(2B)-B(3B)  | 59.47(12)  |
| C(1B)-B(2B)-B(6B)  | 58.94(10)  |
| B(7B)-B(2B)-B(6B)  | 59.78(12)  |
| B(8B)-B(2B)-B(6B)  | 107.71(16) |
| B(3B)-B(2B)-B(6B)  | 107.65(14) |
| C(1B)-B(2B)-H(2B)  | 124.1      |
| B(7B)-B(2B)-H(2B)  | 122.1      |
| B(8B)-B(2B)-H(2B)  | 122.4      |
| B(3B)-B(2B)-H(2B)  | 121.8      |
| B(6B)-B(2B)-H(2B)  | 121.7      |
| C(1B)-B(3B)-B(8B)  | 105.78(14) |
| C(1B)-B(3B)-B(9B)  | 105.52(15) |
| B(8B)-B(3B)-B(9B)  | 60.28(14)  |
| C(1B)-B(3B)-B(4B)  | 58.90(11)  |
| B(8B)-B(3B)-B(4B)  | 108.01(17) |
| B(9B)-B(3B)-B(4B)  | 59.78(13)  |
| C(1B)-B(3B)-B(2B)  | 59.13(11)  |
| B(8B)-B(3B)-B(2B)  | 60.15(12)  |
| B(9B)-B(3B)-B(2B)  | 108.32(16) |
| B(4B)-B(3B)-B(2B)  | 107.98(14) |
| C(1B)-B(3B)-H(3B)  | 124.0      |
| B(8B)-B(3B)-H(3B)  | 122.0      |
| B(9B)-B(3B)-H(3B)  | 122.1      |
| B(4B)-B(3B)-H(3B)  | 121.7      |
| B(2B)-B(3B)-H(3B)  | 121.4      |
| C(1B)-B(4B)-B(10B) | 105.82(14) |
| C(1B)-B(4B)-B(9B)  | 105.73(14) |
| B(10B)-B(4B)-B(9B) | 60.40(14)  |
| C(1B)-B(4B)-B(5B)  | 59.45(10)  |
| B(10B)-B(4B)-B(5B) | 59.55(12)  |
| B(9B)-B(4B)-B(5B)  | 107.96(15) |
| C(1B)-B(4B)-B(3B)  | 59.09(11)  |
| B(10B)-B(4B)-B(3B) | 108.22(15) |
| B(9B)-B(4B)-B(3B)  | 59.86(13)  |
| B(5B)-B(4B)-B(3B)  | 108.21(14) |
| C(1B)-B(4B)-H(4B)  | 123.7      |

|                     |            |
|---------------------|------------|
| B(10B)-B(4B)-H(4B)  | 122.1      |
| B(9B)-B(4B)-H(4B)   | 122.1      |
| B(5B)-B(4B)-H(4B)   | 121.6      |
| B(3B)-B(4B)-H(4B)   | 121.5      |
| C(1B)-B(5B)-B(10B)  | 105.93(15) |
| C(1B)-B(5B)-B(11B)  | 105.79(14) |
| B(10B)-B(5B)-B(11B) | 60.71(13)  |
| C(1B)-B(5B)-B(4B)   | 58.98(11)  |
| B(10B)-B(5B)-B(4B)  | 60.16(13)  |
| B(11B)-B(5B)-B(4B)  | 108.63(15) |
| C(1B)-B(5B)-B(6B)   | 59.02(10)  |
| B(10B)-B(5B)-B(6B)  | 108.47(15) |
| B(11B)-B(5B)-B(6B)  | 59.87(12)  |
| B(4B)-B(5B)-B(6B)   | 108.03(14) |
| C(1B)-B(5B)-H(5B)   | 124.0      |
| B(10B)-B(5B)-H(5B)  | 121.7      |
| B(11B)-B(5B)-H(5B)  | 121.8      |
| B(4B)-B(5B)-H(5B)   | 121.4      |
| B(6B)-B(5B)-H(5B)   | 121.6      |
| C(1B)-B(6B)-B(11B)  | 105.91(14) |
| C(1B)-B(6B)-B(7B)   | 105.53(14) |
| B(11B)-B(6B)-B(7B)  | 60.49(13)  |
| C(1B)-B(6B)-B(5B)   | 59.24(11)  |
| B(11B)-B(6B)-B(5B)  | 59.80(12)  |
| B(7B)-B(6B)-B(5B)   | 108.01(15) |
| C(1B)-B(6B)-B(2B)   | 59.07(10)  |
| B(11B)-B(6B)-B(2B)  | 108.42(15) |
| B(7B)-B(6B)-B(2B)   | 59.77(12)  |
| B(5B)-B(6B)-B(2B)   | 108.14(14) |
| C(1B)-B(6B)-H(6B)   | 123.9      |
| B(11B)-B(6B)-H(6B)  | 121.9      |
| B(7B)-B(6B)-H(6B)   | 122.2      |
| B(5B)-B(6B)-H(6B)   | 121.6      |
| B(2B)-B(6B)-H(6B)   | 121.5      |
| B(2B)-B(7B)-B(6B)   | 60.44(12)  |
| B(2B)-B(7B)-B(8B)   | 60.02(13)  |

|                     |            |
|---------------------|------------|
| B(6B)-B(7B)-B(8B)   | 108.03(15) |
| B(2B)-B(7B)-B(12B)  | 108.06(16) |
| B(6B)-B(7B)-B(12B)  | 107.50(15) |
| B(8B)-B(7B)-B(12B)  | 59.97(14)  |
| B(2B)-B(7B)-B(11B)  | 108.30(15) |
| B(6B)-B(7B)-B(11B)  | 59.69(12)  |
| B(8B)-B(7B)-B(11B)  | 107.93(16) |
| B(12B)-B(7B)-B(11B) | 59.81(13)  |
| B(2B)-B(7B)-H(7B)   | 121.4      |
| B(6B)-B(7B)-H(7B)   | 121.8      |
| B(8B)-B(7B)-H(7B)   | 121.7      |
| B(12B)-B(7B)-H(7B)  | 122.0      |
| B(11B)-B(7B)-H(7B)  | 121.8      |
| B(3B)-B(8B)-B(9B)   | 60.04(13)  |
| B(3B)-B(8B)-B(2B)   | 60.39(12)  |
| B(9B)-B(8B)-B(2B)   | 108.32(15) |
| B(3B)-B(8B)-B(7B)   | 108.08(15) |
| B(9B)-B(8B)-B(7B)   | 108.09(17) |
| B(2B)-B(8B)-B(7B)   | 59.71(13)  |
| B(3B)-B(8B)-B(12B)  | 107.97(16) |
| B(9B)-B(8B)-B(12B)  | 59.94(14)  |
| B(2B)-B(8B)-B(12B)  | 107.90(16) |
| B(7B)-B(8B)-B(12B)  | 60.07(14)  |
| B(3B)-B(8B)-H(8B)   | 121.6      |
| B(9B)-B(8B)-H(8B)   | 121.6      |
| B(2B)-B(8B)-H(8B)   | 121.6      |
| B(7B)-B(8B)-H(8B)   | 121.8      |
| B(12B)-B(8B)-H(8B)  | 121.8      |
| B(4B)-B(9B)-B(3B)   | 60.36(12)  |
| B(4B)-B(9B)-B(8B)   | 108.00(15) |
| B(3B)-B(9B)-B(8B)   | 59.68(13)  |
| B(4B)-B(9B)-B(12B)  | 107.75(16) |
| B(3B)-B(9B)-B(12B)  | 107.90(16) |
| B(8B)-B(9B)-B(12B)  | 60.20(14)  |
| B(4B)-B(9B)-B(10B)  | 59.78(13)  |
| B(3B)-B(9B)-B(10B)  | 108.13(15) |



|                      |            |
|----------------------|------------|
| B(8B)-B(9B)-B(10B)   | 108.13(16) |
| B(12B)-B(9B)-B(10B)  | 59.92(14)  |
| B(4B)-B(9B)-H(9B)    | 121.8      |
| B(3B)-B(9B)-H(9B)    | 121.7      |
| B(8B)-B(9B)-H(9B)    | 121.7      |
| B(12B)-B(9B)-H(9B)   | 121.8      |
| B(10B)-B(9B)-H(9B)   | 121.7      |
| B(5B)-B(10B)-B(4B)   | 60.28(12)  |
| B(5B)-B(10B)-B(12B)  | 107.89(16) |
| B(4B)-B(10B)-B(12B)  | 107.79(17) |
| B(5B)-B(10B)-B(9B)   | 108.08(16) |
| B(4B)-B(10B)-B(9B)   | 59.82(13)  |
| B(12B)-B(10B)-B(9B)  | 59.95(14)  |
| B(5B)-B(10B)-B(11B)  | 59.92(12)  |
| B(4B)-B(10B)-B(11B)  | 108.09(15) |
| B(12B)-B(10B)-B(11B) | 59.97(13)  |
| B(9B)-B(10B)-B(11B)  | 107.99(17) |
| B(5B)-B(10B)-H(10B)  | 121.6      |
| B(4B)-B(10B)-H(10B)  | 121.7      |
| B(12B)-B(10B)-H(10B) | 121.9      |
| B(9B)-B(10B)-H(10B)  | 121.8      |
| B(11B)-B(10B)-H(10B) | 121.7      |
| B(5B)-B(11B)-B(6B)   | 60.34(12)  |
| B(5B)-B(11B)-B(12B)  | 107.36(16) |
| B(6B)-B(11B)-B(12B)  | 107.82(16) |
| B(5B)-B(11B)-B(10B)  | 59.37(12)  |
| B(6B)-B(11B)-B(10B)  | 107.77(15) |
| B(12B)-B(11B)-B(10B) | 59.86(13)  |
| B(5B)-B(11B)-B(7B)   | 107.90(15) |
| B(6B)-B(11B)-B(7B)   | 59.82(12)  |
| B(12B)-B(11B)-B(7B)  | 60.08(13)  |
| B(10B)-B(11B)-B(7B)  | 107.86(16) |
| B(5B)-B(11B)-H(11B)  | 122.0      |
| B(6B)-B(11B)-H(11B)  | 121.7      |
| B(12B)-B(11B)-H(11B) | 121.9      |
| B(10B)-B(11B)-H(11B) | 122.0      |

|                      |            |
|----------------------|------------|
| B(7B)-B(11B)-H(11B)  | 121.7      |
| B(10B)-B(12B)-B(9B)  | 60.13(14)  |
| B(10B)-B(12B)-B(11B) | 60.17(13)  |
| B(9B)-B(12B)-B(11B)  | 108.30(16) |
| B(10B)-B(12B)-B(8B)  | 108.02(16) |
| B(9B)-B(12B)-B(8B)   | 59.86(14)  |
| B(11B)-B(12B)-B(8B)  | 108.15(16) |
| B(10B)-B(12B)-B(7B)  | 108.13(15) |
| B(9B)-B(12B)-B(7B)   | 107.94(17) |
| B(11B)-B(12B)-B(7B)  | 60.10(13)  |
| B(8B)-B(12B)-B(7B)   | 59.96(14)  |
| B(10B)-B(12B)-H(12B) | 121.6      |
| B(9B)-B(12B)-H(12B)  | 121.7      |
| B(11B)-B(12B)-H(12B) | 121.5      |
| B(8B)-B(12B)-H(12B)  | 121.8      |
| B(7B)-B(12B)-H(12B)  | 121.7      |
| C(4B)-C(2B)-C(3B)    | 109.75(17) |
| C(4B)-C(2B)-P(1B)    | 118.33(14) |
| C(3B)-C(2B)-P(1B)    | 111.03(13) |
| C(4B)-C(2B)-H(2D)    | 105.6      |
| C(3B)-C(2B)-H(2D)    | 105.6      |
| P(1B)-C(2B)-H(2D)    | 105.6      |
| C(2B)-C(3B)-H(3F)    | 109.5      |
| C(2B)-C(3B)-H(3G)    | 109.5      |
| H(3F)-C(3B)-H(3G)    | 109.5      |
| C(2B)-C(3B)-H(3H)    | 109.5      |
| H(3F)-C(3B)-H(3H)    | 109.5      |
| H(3G)-C(3B)-H(3H)    | 109.5      |
| C(2B)-C(4B)-H(4F)    | 109.5      |
| C(2B)-C(4B)-H(4G)    | 109.5      |
| H(4F)-C(4B)-H(4G)    | 109.5      |
| C(2B)-C(4B)-H(4H)    | 109.5      |
| H(4F)-C(4B)-H(4H)    | 109.5      |
| H(4G)-C(4B)-H(4H)    | 109.5      |
| C(6B)-C(5B)-C(7B)    | 109.47(17) |
| C(6B)-C(5B)-P(1B)    | 118.89(14) |

|                   |            |
|-------------------|------------|
| C(7B)-C(5B)-P(1B) | 110.14(15) |
| C(6B)-C(5B)-H(5D) | 105.8      |
| C(7B)-C(5B)-H(5D) | 105.8      |
| P(1B)-C(5B)-H(5D) | 105.8      |
| C(5B)-C(6B)-H(6F) | 109.5      |
| C(5B)-C(6B)-H(6G) | 109.5      |
| H(6F)-C(6B)-H(6G) | 109.5      |
| C(5B)-C(6B)-H(6H) | 109.5      |
| H(6F)-C(6B)-H(6H) | 109.5      |
| H(6G)-C(6B)-H(6H) | 109.5      |
| C(5B)-C(7B)-H(7F) | 109.5      |
| C(5B)-C(7B)-H(7G) | 109.5      |
| H(7F)-C(7B)-H(7G) | 109.5      |
| C(5B)-C(7B)-H(7H) | 109.5      |
| H(7F)-C(7B)-H(7H) | 109.5      |
| H(7G)-C(7B)-H(7H) | 109.5      |
| O(2T)-Li(1)-O(3T) | 111.0(6)   |
| O(4T)-Li(1)-O(2D) | 95.9(14)   |
| O(4T)-Li(1)-O(3D) | 112.3(7)   |
| O(2D)-Li(1)-O(3D) | 112.3(10)  |
| O(2T)-Li(1)-O(4D) | 109.2(8)   |
| O(3T)-Li(1)-O(4D) | 99.6(5)    |
| O(2T)-Li(1)-O(1T) | 115.6(7)   |
| O(3T)-Li(1)-O(1T) | 113.6(8)   |
| O(4D)-Li(1)-O(1T) | 106.5(5)   |
| O(4T)-Li(1)-O(1D) | 104.4(8)   |
| O(2D)-Li(1)-O(1D) | 118.7(11)  |
| O(3D)-Li(1)-O(1D) | 111.7(10)  |
| C(1T)-O(1T)-C(4T) | 111.0(7)   |
| C(1T)-O(1T)-Li(1) | 127.8(8)   |
| C(4T)-O(1T)-Li(1) | 117.0(7)   |
| O(1T)-C(1T)-C(2T) | 102.5(8)   |
| O(1T)-C(1T)-H(1A) | 111.3      |
| C(2T)-C(1T)-H(1A) | 111.3      |
| O(1T)-C(1T)-H(1B) | 111.3      |
| C(2T)-C(1T)-H(1B) | 111.3      |

|                   |           |
|-------------------|-----------|
| H(1A)-C(1T)-H(1B) | 109.2     |
| C(1T)-C(2T)-C(3T) | 104.9(8)  |
| C(1T)-C(2T)-H(2E) | 110.8     |
| C(3T)-C(2T)-H(2E) | 110.8     |
| C(1T)-C(2T)-H(2F) | 110.8     |
| C(3T)-C(2T)-H(2F) | 110.8     |
| H(2E)-C(2T)-H(2F) | 108.8     |
| C(2T)-C(3T)-C(4T) | 97.7(7)   |
| C(2T)-C(3T)-H(3I) | 112.2     |
| C(4T)-C(3T)-H(3I) | 112.2     |
| C(2T)-C(3T)-H(3J) | 112.2     |
| C(4T)-C(3T)-H(3J) | 112.2     |
| H(3I)-C(3T)-H(3J) | 109.8     |
| O(1T)-C(4T)-C(3T) | 102.5(6)  |
| O(1T)-C(4T)-H(4I) | 111.3     |
| C(3T)-C(4T)-H(4I) | 111.3     |
| O(1T)-C(4T)-H(4J) | 111.3     |
| C(3T)-C(4T)-H(4J) | 111.3     |
| H(4I)-C(4T)-H(4J) | 109.2     |
| C(1D)-O(1D)-C(4D) | 103.4(10) |
| C(1D)-O(1D)-Li(1) | 132.4(12) |
| C(4D)-O(1D)-Li(1) | 121.1(10) |
| O(1D)-C(1D)-C(2D) | 109.5(10) |
| O(1D)-C(1D)-H(1C) | 109.8     |
| C(2D)-C(1D)-H(1C) | 109.8     |
| O(1D)-C(1D)-H(1D) | 109.8     |
| C(2D)-C(1D)-H(1D) | 109.8     |
| H(1C)-C(1D)-H(1D) | 108.2     |
| C(1D)-C(2D)-C(3D) | 95.9(11)  |
| C(1D)-C(2D)-H(2G) | 112.6     |
| C(3D)-C(2D)-H(2G) | 112.6     |
| C(1D)-C(2D)-H(2H) | 112.6     |
| C(3D)-C(2D)-H(2H) | 112.6     |
| H(2G)-C(2D)-H(2H) | 110.1     |
| C(4D)-C(3D)-C(2D) | 99.9(10)  |
| C(4D)-C(3D)-H(3K) | 111.8     |

|                   |           |
|-------------------|-----------|
| C(2D)-C(3D)-H(3K) | 111.8     |
| C(4D)-C(3D)-H(3L) | 111.8     |
| C(2D)-C(3D)-H(3L) | 111.8     |
| H(3K)-C(3D)-H(3L) | 109.5     |
| O(1D)-C(4D)-C(3D) | 107.3(11) |
| O(1D)-C(4D)-H(4K) | 110.3     |
| C(3D)-C(4D)-H(4K) | 110.3     |
| O(1D)-C(4D)-H(4L) | 110.3     |
| C(3D)-C(4D)-H(4L) | 110.3     |
| H(4K)-C(4D)-H(4L) | 108.5     |
| C(8T)-O(2T)-C(5T) | 104.0(7)  |
| C(8T)-O(2T)-Li(1) | 134.1(8)  |
| C(5T)-O(2T)-Li(1) | 120.4(8)  |
| O(2T)-C(5T)-C(6T) | 107.9(9)  |
| O(2T)-C(5T)-H(5E) | 110.1     |
| C(6T)-C(5T)-H(5E) | 110.1     |
| O(2T)-C(5T)-H(5F) | 110.1     |
| C(6T)-C(5T)-H(5F) | 110.1     |
| H(5E)-C(5T)-H(5F) | 108.4     |
| C(7T)-C(6T)-C(5T) | 105.7(7)  |
| C(7T)-C(6T)-H(6I) | 110.6     |
| C(5T)-C(6T)-H(6I) | 110.6     |
| C(7T)-C(6T)-H(6J) | 110.6     |
| C(5T)-C(6T)-H(6J) | 110.6     |
| H(6I)-C(6T)-H(6J) | 108.7     |
| C(6T)-C(7T)-C(8T) | 104.2(6)  |
| C(6T)-C(7T)-H(7I) | 110.9     |
| C(8T)-C(7T)-H(7I) | 110.9     |
| C(6T)-C(7T)-H(7J) | 110.9     |
| C(8T)-C(7T)-H(7J) | 110.9     |
| H(7I)-C(7T)-H(7J) | 108.9     |
| O(2T)-C(8T)-C(7T) | 106.5(9)  |
| O(2T)-C(8T)-H(8C) | 110.4     |
| C(7T)-C(8T)-H(8C) | 110.4     |
| O(2T)-C(8T)-H(8D) | 110.4     |
| C(7T)-C(8T)-H(8D) | 110.4     |

|                    |           |
|--------------------|-----------|
| H(8C)-C(8T)-H(8D)  | 108.6     |
| C(8D)-O(2D)-C(5D)  | 113.9(10) |
| C(8D)-O(2D)-Li(1)  | 132.4(13) |
| C(5D)-O(2D)-Li(1)  | 113.7(12) |
| O(2D)-C(5D)-C(6D)  | 103.8(13) |
| O(2D)-C(5D)-H(5G)  | 111.0     |
| C(6D)-C(5D)-H(5G)  | 111.0     |
| O(2D)-C(5D)-H(5H)  | 111.0     |
| C(6D)-C(5D)-H(5H)  | 111.0     |
| H(5G)-C(5D)-H(5H)  | 109.0     |
| C(7D)-C(6D)-C(5D)  | 107.9(13) |
| C(7D)-C(6D)-H(6K)  | 110.1     |
| C(5D)-C(6D)-H(6K)  | 110.1     |
| C(7D)-C(6D)-H(6L)  | 110.1     |
| C(5D)-C(6D)-H(6L)  | 110.1     |
| H(6K)-C(6D)-H(6L)  | 108.4     |
| C(6D)-C(7D)-C(8D)  | 108.0(11) |
| C(6D)-C(7D)-H(7K)  | 110.1     |
| C(8D)-C(7D)-H(7K)  | 110.1     |
| C(6D)-C(7D)-H(7L)  | 110.1     |
| C(8D)-C(7D)-H(7L)  | 110.1     |
| H(7K)-C(7D)-H(7L)  | 108.4     |
| O(2D)-C(8D)-C(7D)  | 104.2(9)  |
| O(2D)-C(8D)-H(8E)  | 110.9     |
| C(7D)-C(8D)-H(8E)  | 110.9     |
| O(2D)-C(8D)-H(8F)  | 110.9     |
| C(7D)-C(8D)-H(8F)  | 110.9     |
| H(8E)-C(8D)-H(8F)  | 108.9     |
| C(12T)-O(3T)-C(9T) | 108.6(7)  |
| C(12T)-O(3T)-Li(1) | 128.3(7)  |
| C(9T)-O(3T)-Li(1)  | 122.8(7)  |
| O(3T)-C(9T)-C(10T) | 107.3(8)  |
| O(3T)-C(9T)-H(9C)  | 110.3     |
| C(10T)-C(9T)-H(9C) | 110.3     |
| O(3T)-C(9T)-H(9D)  | 110.3     |
| C(10T)-C(9T)-H(9D) | 110.3     |

|                      |           |
|----------------------|-----------|
| H(9C)-C(9T)-H(9D)    | 108.5     |
| C(11T)-C(10T)-C(9T)  | 100.8(9)  |
| C(11T)-C(10T)-H(10C) | 111.6     |
| C(9T)-C(10T)-H(10C)  | 111.6     |
| C(11T)-C(10T)-H(10D) | 111.6     |
| C(9T)-C(10T)-H(10D)  | 111.6     |
| H(10C)-C(10T)-H(10D) | 109.4     |
| C(10T)-C(11T)-C(12T) | 105.5(9)  |
| C(10T)-C(11T)-H(11C) | 110.6     |
| C(12T)-C(11T)-H(11C) | 110.6     |
| C(10T)-C(11T)-H(11D) | 110.6     |
| C(12T)-C(11T)-H(11D) | 110.6     |
| H(11C)-C(11T)-H(11D) | 108.8     |
| O(3T)-C(12T)-C(11T)  | 106.3(8)  |
| O(3T)-C(12T)-H(12C)  | 110.5     |
| C(11T)-C(12T)-H(12C) | 110.5     |
| O(3T)-C(12T)-H(12D)  | 110.5     |
| C(11T)-C(12T)-H(12D) | 110.5     |
| H(12C)-C(12T)-H(12D) | 108.7     |
| C(12D)-O(3D)-C(9D)   | 111.1(8)  |
| C(12D)-O(3D)-Li(1)   | 125.6(8)  |
| C(9D)-O(3D)-Li(1)    | 123.2(8)  |
| O(3D)-C(9D)-C(10D)   | 101.2(9)  |
| O(3D)-C(9D)-H(9E)    | 111.5     |
| C(10D)-C(9D)-H(9E)   | 111.5     |
| O(3D)-C(9D)-H(9F)    | 111.5     |
| C(10D)-C(9D)-H(9F)   | 111.5     |
| H(9E)-C(9D)-H(9F)    | 109.3     |
| C(9D)-C(10D)-C(11D)  | 105.7(11) |
| C(9D)-C(10D)-H(10E)  | 110.6     |
| C(11D)-C(10D)-H(10E) | 110.6     |
| C(9D)-C(10D)-H(10F)  | 110.6     |
| C(11D)-C(10D)-H(10F) | 110.6     |
| H(10E)-C(10D)-H(10F) | 108.7     |
| C(12D)-C(11D)-C(10D) | 97.8(10)  |
| C(12D)-C(11D)-H(11E) | 112.2     |

|                      |           |
|----------------------|-----------|
| C(10D)-C(11D)-H(11E) | 112.2     |
| C(12D)-C(11D)-H(11F) | 112.2     |
| C(10D)-C(11D)-H(11F) | 112.2     |
| H(11E)-C(11D)-H(11F) | 109.8     |
| O(3D)-C(12D)-C(11D)  | 105.6(10) |
| O(3D)-C(12D)-H(12E)  | 110.6     |
| C(11D)-C(12D)-H(12E) | 110.6     |
| O(3D)-C(12D)-H(12F)  | 110.6     |
| C(11D)-C(12D)-H(12F) | 110.6     |
| H(12E)-C(12D)-H(12F) | 108.7     |
| C(13T)-O(4D)-C(16T)  | 110.6(6)  |
| C(13T)-O(4D)-Li(1)   | 119.8(5)  |
| C(16T)-O(4D)-Li(1)   | 120.9(7)  |
| O(4D)-C(13T)-C(14T)  | 105.0(5)  |
| O(4D)-C(13T)-H(13A)  | 110.8     |
| C(14T)-C(13T)-H(13A) | 110.8     |
| O(4D)-C(13T)-H(13B)  | 110.8     |
| C(14T)-C(13T)-H(13B) | 110.8     |
| H(13A)-C(13T)-H(13B) | 108.8     |
| C(13T)-C(14T)-C(15T) | 102.2(5)  |
| C(13T)-C(14T)-H(14A) | 111.3     |
| C(15T)-C(14T)-H(14A) | 111.3     |
| C(13T)-C(14T)-H(14B) | 111.3     |
| C(15T)-C(14T)-H(14B) | 111.3     |
| H(14A)-C(14T)-H(14B) | 109.2     |
| C(16T)-C(15T)-C(14T) | 99.9(6)   |
| C(16T)-C(15T)-H(15A) | 111.8     |
| C(14T)-C(15T)-H(15A) | 111.8     |
| C(16T)-C(15T)-H(15B) | 111.8     |
| C(14T)-C(15T)-H(15B) | 111.8     |
| H(15A)-C(15T)-H(15B) | 109.5     |
| O(4D)-C(16T)-C(15T)  | 103.6(7)  |
| O(4D)-C(16T)-H(16A)  | 111.0     |
| C(15T)-C(16T)-H(16A) | 111.0     |
| O(4D)-C(16T)-H(16B)  | 111.0     |
| C(15T)-C(16T)-H(16B) | 111.0     |



|                      |          |
|----------------------|----------|
| H(16A)-C(16T)-H(16B) | 109.0    |
| C(13D)-O(4T)-C(16D)  | 107.6(9) |
| C(13D)-O(4T)-Li(1)   | 139.1(8) |
| C(16D)-O(4T)-Li(1)   | 112.2(7) |
| O(4T)-C(13D)-C(14D)  | 101.4(8) |
| O(4T)-C(13D)-H(13C)  | 111.5    |
| C(14D)-C(13D)-H(13C) | 111.5    |
| O(4T)-C(13D)-H(13D)  | 111.5    |
| C(14D)-C(13D)-H(13D) | 111.5    |
| H(13C)-C(13D)-H(13D) | 109.3    |
| C(15D)-C(14D)-C(13D) | 101.1(7) |
| C(15D)-C(14D)-H(14C) | 111.6    |
| C(13D)-C(14D)-H(14C) | 111.6    |
| C(15D)-C(14D)-H(14D) | 111.6    |
| C(13D)-C(14D)-H(14D) | 111.6    |
| H(14C)-C(14D)-H(14D) | 109.4    |
| C(14D)-C(15D)-C(16D) | 108.4(8) |
| C(14D)-C(15D)-H(15C) | 110.0    |
| C(16D)-C(15D)-H(15C) | 110.0    |
| C(14D)-C(15D)-H(15D) | 110.0    |
| C(16D)-C(15D)-H(15D) | 110.0    |
| H(15C)-C(15D)-H(15D) | 108.4    |
| O(4T)-C(16D)-C(15D)  | 92.6(9)  |
| O(4T)-C(16D)-H(16C)  | 113.2    |
| C(15D)-C(16D)-H(16C) | 113.2    |
| O(4T)-C(16D)-H(16D)  | 113.2    |
| C(15D)-C(16D)-H(16D) | 113.2    |
| H(16C)-C(16D)-H(16D) | 110.5    |

---

Symmetry transformations used to generate equivalent atoms:

Table 10. Anisotropic displacement parameters ( $\text{\AA}^2 \times 10^3$ ) for vL140JE\_0m. The anisotropic displacement factor exponent takes the form:  $-2\pi^2 [ h^2 a^{*2} U^{11} + \dots + 2 h k a^* b^* U^{12} ]$

|        | U <sup>11</sup> | U <sup>22</sup> | U <sup>33</sup> | U <sup>23</sup> | U <sup>13</sup> | U <sup>12</sup> |
|--------|-----------------|-----------------|-----------------|-----------------|-----------------|-----------------|
| Rh(1)  | 18(1)           | 20(1)           | 28(1)           | -15(1)          | 3(1)            | -6(1)           |
| C(1)   | 28(1)           | 37(1)           | 58(1)           | -32(1)          | 7(1)            | -12(1)          |
| O(1)   | 28(1)           | 64(1)           | 107(2)          | -63(1)          | 15(1)           | -7(1)           |
| P(1A)  | 15(1)           | 19(1)           | 23(1)           | -10(1)          | 0(1)            | -4(1)           |
| C(1A)  | 17(1)           | 21(1)           | 22(1)           | -11(1)          | -1(1)           | -5(1)           |
| B(2A)  | 18(1)           | 24(1)           | 31(1)           | -16(1)          | 0(1)            | -5(1)           |
| B(3A)  | 22(1)           | 28(1)           | 26(1)           | -9(1)           | 6(1)            | -5(1)           |
| B(4A)  | 28(1)           | 38(1)           | 30(1)           | -23(1)          | 0(1)            | -3(1)           |
| B(5A)  | 23(1)           | 21(1)           | 37(1)           | -15(1)          | -2(1)           | -4(1)           |
| B(6A)  | 21(1)           | 25(1)           | 23(1)           | -10(1)          | -2(1)           | -3(1)           |
| B(7A)  | 18(1)           | 31(1)           | 35(1)           | -17(1)          | -3(1)           | -2(1)           |
| B(8A)  | 18(1)           | 30(1)           | 43(1)           | -16(1)          | 6(1)            | -6(1)           |
| B(9A)  | 28(1)           | 41(1)           | 33(1)           | -20(1)          | 8(1)            | -2(1)           |
| B(10A) | 28(1)           | 33(1)           | 45(1)           | -27(1)          | 1(1)            | 0(1)            |
| B(11A) | 23(1)           | 23(1)           | 39(1)           | -12(1)          | -3(1)           | 0(1)            |
| B(12A) | 20(1)           | 31(1)           | 43(1)           | -20(1)          | 3(1)            | -1(1)           |
| C(2A)  | 18(1)           | 26(1)           | 35(1)           | -13(1)          | 3(1)            | -8(1)           |
| C(3A)  | 37(1)           | 36(1)           | 56(1)           | -19(1)          | 24(1)           | -14(1)          |
| C(4A)  | 29(1)           | 37(1)           | 57(1)           | -16(1)          | -12(1)          | -12(1)          |
| C(5A)  | 33(1)           | 39(1)           | 30(1)           | -10(1)          | -7(1)           | 6(1)            |
| C(6A)  | 28(1)           | 46(1)           | 53(1)           | -3(1)           | -8(1)           | 6(1)            |
| C(7A)  | 43(1)           | 84(2)           | 62(2)           | 32(2)           | 3(1)            | 7(1)            |
| P(1B)  | 26(1)           | 22(1)           | 21(1)           | -13(1)          | 2(1)            | -7(1)           |
| C(1B)  | 21(1)           | 24(1)           | 23(1)           | -14(1)          | 3(1)            | -8(1)           |
| B(2B)  | 23(1)           | 42(1)           | 34(1)           | -23(1)          | 8(1)            | -11(1)          |
| B(3B)  | 32(1)           | 41(1)           | 35(1)           | -26(1)          | 8(1)            | -20(1)          |
| B(4B)  | 30(1)           | 24(1)           | 37(1)           | -19(1)          | 10(1)           | -9(1)           |
| B(5B)  | 27(1)           | 26(1)           | 29(1)           | -9(1)           | -2(1)           | -9(1)           |
| B(6B)  | 33(1)           | 30(1)           | 23(1)           | -16(1)          | 6(1)            | -14(1)          |
| B(7B)  | 39(1)           | 40(1)           | 32(1)           | -21(1)          | 16(1)           | -21(1)          |
| B(8B)  | 38(1)           | 51(1)           | 44(1)           | -30(1)          | 16(1)           | -29(1)          |

|        |         |        |        |        |        |        |
|--------|---------|--------|--------|--------|--------|--------|
| B(9B)  | 49(1)   | 32(1)  | 45(1)  | -23(1) | 17(1)  | -23(1) |
| B(10B) | 42(1)   | 25(1)  | 42(1)  | -9(1)  | 5(1)   | -10(1) |
| B(11B) | 44(1)   | 32(1)  | 28(1)  | -9(1)  | 2(1)   | -16(1) |
| B(12B) | 51(1)   | 33(1)  | 41(1)  | -16(1) | 15(1)  | -25(1) |
| C(2B)  | 41(1)   | 32(1)  | 28(1)  | -19(1) | 13(1)  | -14(1) |
| C(3B)  | 80(2)   | 45(1)  | 38(1)  | -23(1) | 31(1)  | -32(1) |
| C(4B)  | 61(1)   | 52(1)  | 32(1)  | -29(1) | 14(1)  | -23(1) |
| C(5B)  | 36(1)   | 32(1)  | 29(1)  | -17(1) | -9(1)  | 1(1)   |
| C(6B)  | 44(1)   | 55(1)  | 45(1)  | -27(1) | -19(1) | 0(1)   |
| C(7B)  | 68(2)   | 30(1)  | 36(1)  | -10(1) | -16(1) | 1(1)   |
| Li(1)  | 51(2)   | 42(2)  | 28(2)  | -14(2) | 7(2)   | -19(2) |
| O(1T)  | 45(4)   | 39(4)  | 34(4)  | -19(3) | -9(3)  | -9(3)  |
| C(1T)  | 70(6)   | 53(6)  | 48(4)  | -20(4) | 1(4)   | -32(5) |
| C(2T)  | 75(4)   | 66(5)  | 85(5)  | -11(4) | -17(3) | -41(4) |
| C(3T)  | 118(6)  | 53(4)  | 86(4)  | -33(3) | -49(4) | -20(4) |
| C(4T)  | 82(4)   | 56(4)  | 37(4)  | -26(4) | -15(3) | -15(3) |
| O(1D)  | 51(7)   | 54(7)  | 36(5)  | -23(5) | 5(5)   | -25(6) |
| C(1D)  | 45(5)   | 39(6)  | 49(6)  | -6(5)  | 5(4)   | -17(4) |
| C(2D)  | 74(6)   | 62(6)  | 105(7) | -33(5) | 14(6)  | -40(5) |
| C(3D)  | 98(7)   | 67(6)  | 94(6)  | -41(5) | -21(6) | -36(5) |
| C(4D)  | 105(7)  | 67(7)  | 41(6)  | -22(6) | 2(5)   | -40(6) |
| O(2T)  | 52(5)   | 45(3)  | 26(3)  | -19(2) | 12(2)  | -26(2) |
| C(5T)  | 85(6)   | 69(5)  | 29(4)  | -26(3) | 32(4)  | -51(4) |
| C(6T)  | 130(7)  | 76(4)  | 31(2)  | -26(2) | 11(4)  | -67(4) |
| C(7T)  | 62(3)   | 41(2)  | 35(2)  | -16(2) | -3(2)  | -21(2) |
| C(8T)  | 59(4)   | 44(3)  | 24(3)  | -11(2) | 5(2)   | -24(2) |
| O(2D)  | 53(9)   | 57(6)  | 31(6)  | -26(5) | 18(5)  | -30(5) |
| C(5D)  | 52(7)   | 48(6)  | 37(6)  | -26(5) | 11(5)  | -22(5) |
| C(6D)  | 116(10) | 128(9) | 50(7)  | -60(6) | 44(7)  | -77(8) |
| C(7D)  | 177(13) | 66(7)  | 55(6)  | -37(5) | 26(8)  | -60(7) |
| C(8D)  | 81(9)   | 50(7)  | 47(6)  | -20(5) | 18(5)  | -39(6) |
| O(3T)  | 39(3)   | 37(4)  | 30(3)  | -4(3)  | 4(2)   | -2(2)  |
| C(9T)  | 45(3)   | 46(4)  | 37(4)  | -16(3) | 1(3)   | -2(3)  |
| C(10T) | 55(4)   | 50(4)  | 28(3)  | -8(2)  | 2(2)   | -26(2) |
| C(11T) | 68(7)   | 79(6)  | 38(4)  | -28(4) | 20(4)  | -27(4) |
| C(12T) | 29(3)   | 43(3)  | 58(4)  | -19(2) | 9(3)   | -9(2)  |

|        |        |        |        |        |        |        |
|--------|--------|--------|--------|--------|--------|--------|
| O(3D)  | 49(5)  | 48(5)  | 27(4)  | -18(3) | 12(3)  | -9(4)  |
| C(9D)  | 43(4)  | 41(4)  | 29(4)  | -9(3)  | 2(3)   | 0(3)   |
| C(10D) | 59(5)  | 54(5)  | 32(3)  | -9(3)  | 0(3)   | -19(4) |
| C(11D) | 36(4)  | 76(6)  | 42(5)  | -34(4) | 14(3)  | -18(4) |
| C(12D) | 40(5)  | 54(5)  | 36(3)  | -18(3) | 5(3)   | -3(3)  |
| O(4D)  | 54(3)  | 38(2)  | 39(3)  | -10(2) | 0(2)   | -26(2) |
| C(13T) | 42(3)  | 25(2)  | 42(3)  | -12(2) | 7(2)   | -6(2)  |
| C(14T) | 78(3)  | 64(3)  | 58(3)  | -4(2)  | -19(2) | -14(3) |
| C(15T) | 111(6) | 113(8) | 95(6)  | -66(5) | -39(5) | -11(6) |
| C(16T) | 78(2)  | 56(4)  | 119(6) | -29(4) | -55(5) | -10(2) |
| O(4T)  | 59(4)  | 32(3)  | 66(7)  | -14(3) | -20(4) | -10(3) |
| C(13D) | 64(6)  | 36(3)  | 54(5)  | -16(3) | 13(4)  | -13(3) |
| C(14D) | 78(3)  | 64(3)  | 58(3)  | -4(2)  | -19(2) | -14(3) |
| C(15D) | 131(7) | 53(4)  | 38(3)  | -14(3) | -2(4)  | -27(5) |
| C(16D) | 78(2)  | 56(4)  | 119(6) | -29(4) | -55(5) | -10(2) |

---

Table 11. Hydrogen coordinates ( $\times 10^4$ ) and isotropic displacement parameters ( $\text{\AA}^2 \times 10^{-3}$ ) for vL140JE\_0m.

|        | x     | y     | z    | U(eq) |
|--------|-------|-------|------|-------|
| H(2A)  | 1693  | 6798  | 3198 | 27    |
| H(3A)  | 1375  | 7197  | 1392 | 32    |
| H(4A)  | 308   | 5773  | 1301 | 36    |
| H(5A)  | 39    | 4505  | 3057 | 32    |
| H(6A)  | 911   | 5141  | 4232 | 28    |
| H(7A)  | 3905  | 5153  | 3950 | 33    |
| H(8A)  | 4162  | 6428  | 2193 | 36    |
| H(9A)  | 3296  | 5771  | 1018 | 41    |
| H(10A) | 2485  | 4097  | 2056 | 40    |
| H(11A) | 2866  | 3713  | 3865 | 35    |
| H(12A) | 4874  | 4505  | 2599 | 37    |
| H(2C)  | -1518 | 5415  | 3774 | 31    |
| H(3C)  | -3739 | 5854  | 4282 | 65    |
| H(3D)  | -3871 | 6850  | 3605 | 65    |
| H(3E)  | -2709 | 6406  | 4346 | 65    |
| H(4C)  | -3286 | 5172  | 3202 | 60    |
| H(4D)  | -2163 | 5450  | 2479 | 60    |
| H(4E)  | -3595 | 6151  | 2471 | 60    |
| H(5C)  | -2175 | 7033  | 1475 | 45    |
| H(6C)  | -3974 | 8294  | 1342 | 76    |
| H(6D)  | -3336 | 8349  | 2131 | 76    |
| H(6E)  | -3973 | 7533  | 2273 | 76    |
| H(7C)  | -1950 | 8490  | 609  | 133   |
| H(7D)  | -501  | 7754  | 855  | 133   |
| H(7E)  | -960  | 8403  | 1336 | 133   |
| H(2B)  | 4105  | 8441  | 3135 | 36    |
| H(3B)  | 2803  | 9498  | 4117 | 37    |
| H(4B)  | -225  | 10099 | 3732 | 34    |
| H(5B)  | -796  | 9436  | 2505 | 33    |
| H(6B)  | 1872  | 8404  | 2139 | 31    |

|        |       |       |      |    |
|--------|-------|-------|------|----|
| H(7B)  | 3711  | 9618  | 1315 | 40 |
| H(8B)  | 4267  | 10303 | 2540 | 46 |
| H(9B)  | 1589  | 11325 | 2907 | 46 |
| H(10B) | -636  | 11279 | 1912 | 45 |
| H(11B) | 677   | 10226 | 921  | 41 |
| H(12B) | 2142  | 11404 | 1171 | 47 |
| H(2D)  | -796  | 8707  | 4616 | 37 |
| H(3F)  | -1279 | 7659  | 5862 | 77 |
| H(3G)  | 240   | 7014  | 5932 | 77 |
| H(3H)  | -851  | 7181  | 5220 | 77 |
| H(4F)  | -58   | 8844  | 5749 | 65 |
| H(4G)  | 1057  | 9109  | 5018 | 65 |
| H(4H)  | 1415  | 8161  | 5797 | 65 |
| H(5D)  | 3350  | 7106  | 4032 | 38 |
| H(6F)  | 4666  | 6974  | 5124 | 70 |
| H(6G)  | 3330  | 7412  | 5531 | 70 |
| H(6H)  | 3904  | 7998  | 4643 | 70 |
| H(7F)  | 3480  | 5809  | 5205 | 71 |
| H(7G)  | 1951  | 6101  | 4796 | 71 |
| H(7H)  | 2170  | 6249  | 5627 | 71 |
| H(1A)  | 8249  | 3785  | 316  | 64 |
| H(1B)  | 9138  | 2769  | 647  | 64 |
| H(2E)  | 10088 | 3946  | 868  | 91 |
| H(2F)  | 10471 | 2929  | 1538 | 91 |
| H(3I)  | 8221  | 4320  | 1691 | 97 |
| H(3J)  | 9437  | 3670  | 2394 | 97 |
| H(4I)  | 8632  | 2424  | 2610 | 67 |
| H(4J)  | 7202  | 3158  | 2562 | 67 |
| H(1C)  | 8527  | 3462  | 259  | 56 |
| H(1D)  | 9526  | 2627  | 969  | 56 |
| H(2G)  | 8919  | 4430  | 801  | 92 |
| H(2H)  | 10452 | 3770  | 866  | 92 |
| H(3K)  | 10025 | 2797  | 2259 | 94 |
| H(3L)  | 9468  | 3763  | 2281 | 94 |
| H(4K)  | 7712  | 2827  | 2630 | 80 |
| H(4L)  | 7192  | 3852  | 2003 | 80 |

|        |      |      |      |     |
|--------|------|------|------|-----|
| H(5E)  | 8475 | 1600 | 134  | 66  |
| H(5F)  | 7180 | 2456 | -146 | 66  |
| H(6I)  | 6066 | 1893 | -736 | 83  |
| H(6J)  | 7529 | 1188 | -679 | 83  |
| H(7I)  | 6604 | 156  | 244  | 52  |
| H(7J)  | 5205 | 879  | 267  | 52  |
| H(8C)  | 6002 | 510  | 1577 | 50  |
| H(8D)  | 7597 | 191  | 1339 | 50  |
| H(5G)  | 8472 | 1793 | 292  | 49  |
| H(5H)  | 7035 | 2453 | -186 | 49  |
| H(6K)  | 6739 | 1540 | -710 | 100 |
| H(6L)  | 8345 | 1036 | -451 | 100 |
| H(7K)  | 7787 | -60  | 594  | 108 |
| H(7L)  | 6245 | 331  | 177  | 108 |
| H(8E)  | 5430 | 734  | 1211 | 67  |
| H(8F)  | 6927 | 229  | 1685 | 67  |
| H(9C)  | 7377 | 1121 | 3502 | 53  |
| H(9D)  | 7122 | 513  | 3056 | 53  |
| H(10C) | 5328 | 121  | 3922 | 54  |
| H(10D) | 6254 | 241  | 4568 | 54  |
| H(11C) | 4941 | 1626 | 4317 | 72  |
| H(11D) | 3748 | 1201 | 4200 | 72  |
| H(12C) | 3689 | 1923 | 2791 | 53  |
| H(12D) | 4342 | 2590 | 2988 | 53  |
| H(9E)  | 7608 | 713  | 3236 | 50  |
| H(9F)  | 6326 | 394  | 3047 | 50  |
| H(10E) | 6549 | 939  | 4377 | 60  |
| H(10F) | 5967 | 119  | 4451 | 60  |
| H(11E) | 3869 | 1056 | 3759 | 58  |
| H(11F) | 4147 | 1486 | 4388 | 58  |
| H(12E) | 3995 | 2445 | 2792 | 55  |
| H(12F) | 5171 | 2488 | 3346 | 55  |
| H(13A) | 5413 | 4102 | 204  | 46  |
| H(13B) | 4532 | 4334 | 944  | 46  |
| H(14A) | 3343 | 4918 | -511 | 87  |
| H(14B) | 2433 | 4565 | 328  | 87  |

|        |      |      |      |     |
|--------|------|------|------|-----|
| H(15A) | 2254 | 3672 | -375 | 119 |
| H(15B) | 3885 | 3540 | -621 | 119 |
| H(16A) | 2762 | 2800 | 1055 | 101 |
| H(16B) | 4004 | 2288 | 638  | 101 |
| H(13C) | 5100 | 4254 | 105  | 63  |
| H(13D) | 3685 | 4308 | 643  | 63  |
| H(14C) | 2658 | 4429 | -547 | 87  |
| H(14D) | 4108 | 3963 | -859 | 87  |
| H(15C) | 3720 | 2635 | -145 | 89  |
| H(15D) | 2171 | 3115 | 22   | 89  |
| H(16C) | 2813 | 2965 | 1354 | 101 |
| H(16D) | 3800 | 2057 | 1321 | 101 |

---



Table 12. Torsion angles [°] for vL140JE\_0m.

---

|                         |             |
|-------------------------|-------------|
| C(2A)-P(1A)-C(1A)-B(2A) | -127.54(11) |
| C(5A)-P(1A)-C(1A)-B(2A) | 118.94(12)  |
| Rh(1)-P(1A)-C(1A)-B(2A) | -4.90(10)   |
| C(2A)-P(1A)-C(1A)-B(4A) | 91.25(16)   |
| C(5A)-P(1A)-C(1A)-B(4A) | -22.27(18)  |
| Rh(1)-P(1A)-C(1A)-B(4A) | -146.11(14) |
| C(2A)-P(1A)-C(1A)-B(5A) | 8.88(15)    |
| C(5A)-P(1A)-C(1A)-B(5A) | -104.64(15) |
| Rh(1)-P(1A)-C(1A)-B(5A) | 131.52(13)  |
| C(2A)-P(1A)-C(1A)-B(3A) | 166.00(12)  |
| C(5A)-P(1A)-C(1A)-B(3A) | 52.48(15)   |
| Rh(1)-P(1A)-C(1A)-B(3A) | -71.36(12)  |
| C(2A)-P(1A)-C(1A)-B(6A) | -62.00(12)  |
| C(5A)-P(1A)-C(1A)-B(6A) | -175.52(12) |
| Rh(1)-P(1A)-C(1A)-B(6A) | 60.64(11)   |
| B(4A)-C(1A)-B(2A)-B(8A) | -1.62(18)   |
| B(5A)-C(1A)-B(2A)-B(8A) | 67.08(17)   |
| B(3A)-C(1A)-B(2A)-B(8A) | -38.69(13)  |
| B(6A)-C(1A)-B(2A)-B(8A) | 103.52(14)  |
| P(1A)-C(1A)-B(2A)-B(8A) | -149.58(11) |
| B(4A)-C(1A)-B(2A)-B(6A) | -105.15(15) |
| B(5A)-C(1A)-B(2A)-B(6A) | -36.44(13)  |
| B(3A)-C(1A)-B(2A)-B(6A) | -142.22(13) |
| P(1A)-C(1A)-B(2A)-B(6A) | 106.90(11)  |
| B(4A)-C(1A)-B(2A)-B(3A) | 37.07(14)   |
| B(5A)-C(1A)-B(2A)-B(3A) | 105.78(15)  |
| B(6A)-C(1A)-B(2A)-B(3A) | 142.22(13)  |
| P(1A)-C(1A)-B(2A)-B(3A) | -110.88(12) |
| B(4A)-C(1A)-B(2A)-B(7A) | -65.39(17)  |
| B(5A)-C(1A)-B(2A)-B(7A) | 3.32(18)    |
| B(3A)-C(1A)-B(2A)-B(7A) | -102.46(15) |
| B(6A)-C(1A)-B(2A)-B(7A) | 39.76(13)   |
| P(1A)-C(1A)-B(2A)-B(7A) | 146.66(12)  |
| B(4A)-C(1A)-B(2A)-Rh(1) | 152.18(12)  |

|                         |             |
|-------------------------|-------------|
| B(5A)-C(1A)-B(2A)-Rh(1) | -139.12(11) |
| B(3A)-C(1A)-B(2A)-Rh(1) | 115.11(10)  |
| B(6A)-C(1A)-B(2A)-Rh(1) | -102.67(10) |
| P(1A)-C(1A)-B(2A)-Rh(1) | 4.23(9)     |
| B(2A)-C(1A)-B(3A)-B(9A) | 102.06(15)  |
| B(4A)-C(1A)-B(3A)-B(9A) | -39.44(14)  |
| B(5A)-C(1A)-B(3A)-B(9A) | -1.72(19)   |
| B(6A)-C(1A)-B(3A)-B(9A) | 66.30(17)   |
| P(1A)-C(1A)-B(3A)-B(9A) | -161.86(12) |
| B(2A)-C(1A)-B(3A)-B(8A) | 38.57(13)   |
| B(4A)-C(1A)-B(3A)-B(8A) | -102.92(15) |
| B(5A)-C(1A)-B(3A)-B(8A) | -65.21(17)  |
| B(6A)-C(1A)-B(3A)-B(8A) | 2.82(18)    |
| P(1A)-C(1A)-B(3A)-B(8A) | 134.66(12)  |
| B(4A)-C(1A)-B(3A)-B(2A) | -141.49(14) |
| B(5A)-C(1A)-B(3A)-B(2A) | -103.78(14) |
| B(6A)-C(1A)-B(3A)-B(2A) | -35.75(13)  |
| P(1A)-C(1A)-B(3A)-B(2A) | 96.09(12)   |
| B(2A)-C(1A)-B(3A)-B(4A) | 141.49(14)  |
| B(5A)-C(1A)-B(3A)-B(4A) | 37.71(14)   |
| B(6A)-C(1A)-B(3A)-B(4A) | 105.74(14)  |
| P(1A)-C(1A)-B(3A)-B(4A) | -122.42(13) |
| B(8A)-B(2A)-B(3A)-C(1A) | 136.17(14)  |
| B(6A)-B(2A)-B(3A)-C(1A) | 34.39(12)   |
| B(7A)-B(2A)-B(3A)-C(1A) | 99.18(14)   |
| Rh(1)-B(2A)-B(3A)-C(1A) | -74.15(10)  |
| C(1A)-B(2A)-B(3A)-B(9A) | -97.11(15)  |
| B(8A)-B(2A)-B(3A)-B(9A) | 39.06(14)   |
| B(6A)-B(2A)-B(3A)-B(9A) | -62.72(17)  |
| B(7A)-B(2A)-B(3A)-B(9A) | 2.07(19)    |
| Rh(1)-B(2A)-B(3A)-B(9A) | -171.26(12) |
| C(1A)-B(2A)-B(3A)-B(8A) | -136.17(14) |
| B(6A)-B(2A)-B(3A)-B(8A) | -101.78(15) |
| B(7A)-B(2A)-B(3A)-B(8A) | -36.99(14)  |
| Rh(1)-B(2A)-B(3A)-B(8A) | 149.68(13)  |
| C(1A)-B(2A)-B(3A)-B(4A) | -33.70(12)  |

|                          |             |
|--------------------------|-------------|
| B(8A)-B(2A)-B(3A)-B(4A)  | 102.47(15)  |
| B(6A)-B(2A)-B(3A)-B(4A)  | 0.69(17)    |
| B(7A)-B(2A)-B(3A)-B(4A)  | 65.47(16)   |
| Rh(1)-B(2A)-B(3A)-B(4A)  | -107.85(12) |
| B(2A)-C(1A)-B(4A)-B(9A)  | 2.19(19)    |
| B(5A)-C(1A)-B(4A)-B(9A)  | -101.92(15) |
| B(3A)-C(1A)-B(4A)-B(9A)  | 38.97(14)   |
| B(6A)-C(1A)-B(4A)-B(9A)  | -65.59(18)  |
| P(1A)-C(1A)-B(4A)-B(9A)  | 141.40(14)  |
| B(2A)-C(1A)-B(4A)-B(10A) | 64.74(18)   |
| B(5A)-C(1A)-B(4A)-B(10A) | -39.36(14)  |
| B(3A)-C(1A)-B(4A)-B(10A) | 101.52(15)  |
| B(6A)-C(1A)-B(4A)-B(10A) | -3.04(19)   |
| P(1A)-C(1A)-B(4A)-B(10A) | -156.05(13) |
| B(2A)-C(1A)-B(4A)-B(5A)  | 104.11(14)  |
| B(3A)-C(1A)-B(4A)-B(5A)  | 140.88(14)  |
| B(6A)-C(1A)-B(4A)-B(5A)  | 36.33(13)   |
| P(1A)-C(1A)-B(4A)-B(5A)  | -116.69(15) |
| B(2A)-C(1A)-B(4A)-B(3A)  | -36.78(13)  |
| B(5A)-C(1A)-B(4A)-B(3A)  | -140.88(14) |
| B(6A)-C(1A)-B(4A)-B(3A)  | -104.56(14) |
| P(1A)-C(1A)-B(4A)-B(3A)  | 102.43(15)  |
| B(9A)-B(3A)-B(4A)-C(1A)  | 134.99(15)  |
| B(8A)-B(3A)-B(4A)-C(1A)  | 97.29(15)   |
| B(2A)-B(3A)-B(4A)-C(1A)  | 33.83(12)   |
| C(1A)-B(3A)-B(4A)-B(9A)  | -134.99(15) |
| B(8A)-B(3A)-B(4A)-B(9A)  | -37.71(14)  |
| B(2A)-B(3A)-B(4A)-B(9A)  | -101.16(15) |
| C(1A)-B(3A)-B(4A)-B(10A) | -97.24(15)  |
| B(9A)-B(3A)-B(4A)-B(10A) | 37.75(14)   |
| B(8A)-B(3A)-B(4A)-B(10A) | 0.04(19)    |
| B(2A)-B(3A)-B(4A)-B(10A) | -63.42(17)  |
| C(1A)-B(3A)-B(4A)-B(5A)  | -34.54(12)  |
| B(9A)-B(3A)-B(4A)-B(5A)  | 100.45(15)  |
| B(8A)-B(3A)-B(4A)-B(5A)  | 62.75(17)   |
| B(2A)-B(3A)-B(4A)-B(5A)  | -0.71(17)   |

|                           |             |
|---------------------------|-------------|
| B(2A)-C(1A)-B(5A)-B(10A)  | -66.00(17)  |
| B(4A)-C(1A)-B(5A)-B(10A)  | 39.70(13)   |
| B(3A)-C(1A)-B(5A)-B(10A)  | 1.98(18)    |
| B(6A)-C(1A)-B(5A)-B(10A)  | -102.30(15) |
| P(1A)-C(1A)-B(5A)-B(10A)  | 159.54(12)  |
| B(2A)-C(1A)-B(5A)-B(6A)   | 36.30(13)   |
| B(4A)-C(1A)-B(5A)-B(6A)   | 142.00(14)  |
| B(3A)-C(1A)-B(5A)-B(6A)   | 104.28(14)  |
| P(1A)-C(1A)-B(5A)-B(6A)   | -98.16(14)  |
| B(2A)-C(1A)-B(5A)-B(4A)   | -105.70(15) |
| B(3A)-C(1A)-B(5A)-B(4A)   | -37.73(14)  |
| B(6A)-C(1A)-B(5A)-B(4A)   | -142.00(14) |
| P(1A)-C(1A)-B(5A)-B(4A)   | 119.84(15)  |
| B(2A)-C(1A)-B(5A)-B(11A)  | -3.33(18)   |
| B(4A)-C(1A)-B(5A)-B(11A)  | 102.37(15)  |
| B(3A)-C(1A)-B(5A)-B(11A)  | 64.65(17)   |
| B(6A)-C(1A)-B(5A)-B(11A)  | -39.63(13)  |
| P(1A)-C(1A)-B(5A)-B(11A)  | -137.79(13) |
| B(9A)-B(4A)-B(5A)-C(1A)   | 97.06(15)   |
| B(10A)-B(4A)-B(5A)-C(1A)  | 134.65(15)  |
| B(3A)-B(4A)-B(5A)-C(1A)   | 34.57(12)   |
| C(1A)-B(4A)-B(5A)-B(10A)  | -134.65(15) |
| B(9A)-B(4A)-B(5A)-B(10A)  | -37.59(14)  |
| B(3A)-B(4A)-B(5A)-B(10A)  | -100.08(15) |
| C(1A)-B(4A)-B(5A)-B(6A)   | -34.08(12)  |
| B(9A)-B(4A)-B(5A)-B(6A)   | 62.98(17)   |
| B(10A)-B(4A)-B(5A)-B(6A)  | 100.57(15)  |
| B(3A)-B(4A)-B(5A)-B(6A)   | 0.48(18)    |
| C(1A)-B(4A)-B(5A)-B(11A)  | -97.18(14)  |
| B(9A)-B(4A)-B(5A)-B(11A)  | -0.11(19)   |
| B(10A)-B(4A)-B(5A)-B(11A) | 37.47(14)   |
| B(3A)-B(4A)-B(5A)-B(11A)  | -62.61(17)  |
| B(4A)-C(1A)-B(6A)-B(2A)   | 104.85(15)  |
| B(5A)-C(1A)-B(6A)-B(2A)   | 141.48(14)  |
| B(3A)-C(1A)-B(6A)-B(2A)   | 35.92(13)   |
| P(1A)-C(1A)-B(6A)-B(2A)   | -97.60(12)  |

|                          |             |
|--------------------------|-------------|
| B(2A)-C(1A)-B(6A)-B(11A) | -101.55(14) |
| B(4A)-C(1A)-B(6A)-B(11A) | 3.31(18)    |
| B(5A)-C(1A)-B(6A)-B(11A) | 39.94(13)   |
| B(3A)-C(1A)-B(6A)-B(11A) | -65.63(17)  |
| P(1A)-C(1A)-B(6A)-B(11A) | 160.86(11)  |
| B(2A)-C(1A)-B(6A)-B(5A)  | -141.48(14) |
| B(4A)-C(1A)-B(6A)-B(5A)  | -36.63(14)  |
| B(3A)-C(1A)-B(6A)-B(5A)  | -105.56(15) |
| P(1A)-C(1A)-B(6A)-B(5A)  | 120.92(12)  |
| B(2A)-C(1A)-B(6A)-B(7A)  | -38.77(12)  |
| B(4A)-C(1A)-B(6A)-B(7A)  | 66.08(17)   |
| B(5A)-C(1A)-B(6A)-B(7A)  | 102.71(14)  |
| B(3A)-C(1A)-B(6A)-B(7A)  | -2.85(18)   |
| P(1A)-C(1A)-B(6A)-B(7A)  | -136.36(12) |
| B(8A)-B(2A)-B(6A)-C(1A)  | -98.19(15)  |
| B(3A)-B(2A)-B(6A)-C(1A)  | -34.07(12)  |
| B(7A)-B(2A)-B(6A)-C(1A)  | -135.54(14) |
| Rh(1)-B(2A)-B(6A)-C(1A)  | 81.23(9)    |
| C(1A)-B(2A)-B(6A)-B(11A) | 97.19(14)   |
| B(8A)-B(2A)-B(6A)-B(11A) | -0.99(18)   |
| B(3A)-B(2A)-B(6A)-B(11A) | 63.12(16)   |
| B(7A)-B(2A)-B(6A)-B(11A) | -38.35(13)  |
| Rh(1)-B(2A)-B(6A)-B(11A) | 178.42(11)  |
| C(1A)-B(2A)-B(6A)-B(5A)  | 33.69(12)   |
| B(8A)-B(2A)-B(6A)-B(5A)  | -64.50(16)  |
| B(3A)-B(2A)-B(6A)-B(5A)  | -0.39(17)   |
| B(7A)-B(2A)-B(6A)-B(5A)  | -101.85(14) |
| Rh(1)-B(2A)-B(6A)-B(5A)  | 114.92(11)  |
| C(1A)-B(2A)-B(6A)-B(7A)  | 135.54(14)  |
| B(8A)-B(2A)-B(6A)-B(7A)  | 37.35(14)   |
| B(3A)-B(2A)-B(6A)-B(7A)  | 101.46(15)  |
| Rh(1)-B(2A)-B(6A)-B(7A)  | -143.23(12) |
| B(10A)-B(5A)-B(6A)-C(1A) | 97.24(15)   |
| B(4A)-B(5A)-B(6A)-C(1A)  | 33.57(12)   |
| B(11A)-B(5A)-B(6A)-C(1A) | 134.49(14)  |
| C(1A)-B(5A)-B(6A)-B(2A)  | -33.64(11)  |

|                           |             |
|---------------------------|-------------|
| B(10A)-B(5A)-B(6A)-B(2A)  | 63.60(16)   |
| B(4A)-B(5A)-B(6A)-B(2A)   | -0.07(17)   |
| B(11A)-B(5A)-B(6A)-B(2A)  | 100.85(14)  |
| C(1A)-B(5A)-B(6A)-B(11A)  | -134.49(14) |
| B(10A)-B(5A)-B(6A)-B(11A) | -37.25(14)  |
| B(4A)-B(5A)-B(6A)-B(11A)  | -100.92(15) |
| C(1A)-B(5A)-B(6A)-B(7A)   | -96.63(14)  |
| B(10A)-B(5A)-B(6A)-B(7A)  | 0.61(18)    |
| B(4A)-B(5A)-B(6A)-B(7A)   | -63.06(16)  |
| B(11A)-B(5A)-B(6A)-B(7A)  | 37.86(14)   |
| C(1A)-B(2A)-B(7A)-B(12A)  | 61.01(17)   |
| B(8A)-B(2A)-B(7A)-B(12A)  | -38.52(14)  |
| B(6A)-B(2A)-B(7A)-B(12A)  | 100.54(15)  |
| B(3A)-B(2A)-B(7A)-B(12A)  | -1.85(18)   |
| Rh(1)-B(2A)-B(7A)-B(12A)  | 168.28(14)  |
| C(1A)-B(2A)-B(7A)-B(6A)   | -39.53(13)  |
| B(8A)-B(2A)-B(7A)-B(6A)   | -139.06(15) |
| B(3A)-B(2A)-B(7A)-B(6A)   | -102.39(15) |
| Rh(1)-B(2A)-B(7A)-B(6A)   | 67.74(18)   |
| C(1A)-B(2A)-B(7A)-B(8A)   | 99.53(15)   |
| B(6A)-B(2A)-B(7A)-B(8A)   | 139.06(15)  |
| B(3A)-B(2A)-B(7A)-B(8A)   | 36.67(14)   |
| Rh(1)-B(2A)-B(7A)-B(8A)   | -153.19(19) |
| C(1A)-B(2A)-B(7A)-B(11A)  | -1.86(18)   |
| B(8A)-B(2A)-B(7A)-B(11A)  | -101.39(16) |
| B(6A)-B(2A)-B(7A)-B(11A)  | 37.67(14)   |
| B(3A)-B(2A)-B(7A)-B(11A)  | -64.72(18)  |
| Rh(1)-B(2A)-B(7A)-B(11A)  | 105.41(19)  |
| C(1A)-B(6A)-B(7A)-B(2A)   | 38.10(12)   |
| B(11A)-B(6A)-B(7A)-B(2A)  | 137.12(15)  |
| B(5A)-B(6A)-B(7A)-B(2A)   | 99.28(14)   |
| C(1A)-B(6A)-B(7A)-B(12A)  | -61.61(16)  |
| B(2A)-B(6A)-B(7A)-B(12A)  | -99.70(15)  |
| B(11A)-B(6A)-B(7A)-B(12A) | 37.41(14)   |
| B(5A)-B(6A)-B(7A)-B(12A)  | -0.43(18)   |
| C(1A)-B(6A)-B(7A)-B(8A)   | 1.70(18)    |

|                          |             |
|--------------------------|-------------|
| B(2A)-B(6A)-B(7A)-B(8A)  | -36.39(13)  |
| B(11A)-B(6A)-B(7A)-B(8A) | 100.72(16)  |
| B(5A)-B(6A)-B(7A)-B(8A)  | 62.88(17)   |
| C(1A)-B(6A)-B(7A)-B(11A) | -99.02(14)  |
| B(2A)-B(6A)-B(7A)-B(11A) | -137.12(15) |
| B(5A)-B(6A)-B(7A)-B(11A) | -37.84(14)  |
| C(1A)-B(3A)-B(8A)-B(2A)  | -37.94(13)  |
| B(9A)-B(3A)-B(8A)-B(2A)  | -136.69(15) |
| B(4A)-B(3A)-B(8A)-B(2A)  | -99.33(15)  |
| C(1A)-B(3A)-B(8A)-B(12A) | 61.66(18)   |
| B(9A)-B(3A)-B(8A)-B(12A) | -37.08(15)  |
| B(2A)-B(3A)-B(8A)-B(12A) | 99.60(16)   |
| B(4A)-B(3A)-B(8A)-B(12A) | 0.27(19)    |
| C(1A)-B(3A)-B(8A)-B(7A)  | -1.59(19)   |
| B(9A)-B(3A)-B(8A)-B(7A)  | -100.33(16) |
| B(2A)-B(3A)-B(8A)-B(7A)  | 36.35(14)   |
| B(4A)-B(3A)-B(8A)-B(7A)  | -62.98(18)  |
| C(1A)-B(3A)-B(8A)-B(9A)  | 98.74(15)   |
| B(2A)-B(3A)-B(8A)-B(9A)  | 136.69(15)  |
| B(4A)-B(3A)-B(8A)-B(9A)  | 37.36(14)   |
| C(1A)-B(2A)-B(8A)-B(3A)  | 38.43(13)   |
| B(6A)-B(2A)-B(8A)-B(3A)  | 102.01(15)  |
| B(7A)-B(2A)-B(8A)-B(3A)  | 139.34(15)  |
| Rh(1)-B(2A)-B(8A)-B(3A)  | -76.8(3)    |
| C(1A)-B(2A)-B(8A)-B(12A) | -62.50(17)  |
| B(6A)-B(2A)-B(8A)-B(12A) | 1.08(19)    |
| B(3A)-B(2A)-B(8A)-B(12A) | -100.93(16) |
| B(7A)-B(2A)-B(8A)-B(12A) | 38.41(14)   |
| Rh(1)-B(2A)-B(8A)-B(12A) | -177.74(19) |
| C(1A)-B(2A)-B(8A)-B(7A)  | -100.91(14) |
| B(6A)-B(2A)-B(8A)-B(7A)  | -37.33(13)  |
| B(3A)-B(2A)-B(8A)-B(7A)  | -139.34(15) |
| Rh(1)-B(2A)-B(8A)-B(7A)  | 143.9(3)    |
| C(1A)-B(2A)-B(8A)-B(9A)  | 0.34(18)    |
| B(6A)-B(2A)-B(8A)-B(9A)  | 63.92(18)   |
| B(3A)-B(2A)-B(8A)-B(9A)  | -38.09(14)  |

|                           |             |
|---------------------------|-------------|
| B(7A)-B(2A)-B(8A)-B(9A)   | 101.25(16)  |
| Rh(1)-B(2A)-B(8A)-B(9A)   | -114.9(2)   |
| B(2A)-B(7A)-B(8A)-B(3A)   | -36.50(13)  |
| B(12A)-B(7A)-B(8A)-B(3A)  | 100.03(16)  |
| B(6A)-B(7A)-B(8A)-B(3A)   | -0.09(19)   |
| B(11A)-B(7A)-B(8A)-B(3A)  | 62.62(17)   |
| B(12A)-B(7A)-B(8A)-B(2A)  | 136.52(15)  |
| B(6A)-B(7A)-B(8A)-B(2A)   | 36.41(13)   |
| B(11A)-B(7A)-B(8A)-B(2A)  | 99.12(14)   |
| B(2A)-B(7A)-B(8A)-B(12A)  | -136.52(15) |
| B(6A)-B(7A)-B(8A)-B(12A)  | -100.11(15) |
| B(11A)-B(7A)-B(8A)-B(12A) | -37.40(13)  |
| B(2A)-B(7A)-B(8A)-B(9A)   | -99.37(15)  |
| B(12A)-B(7A)-B(8A)-B(9A)  | 37.15(13)   |
| B(6A)-B(7A)-B(8A)-B(9A)   | -62.96(17)  |
| B(11A)-B(7A)-B(8A)-B(9A)  | -0.25(17)   |
| C(1A)-B(3A)-B(9A)-B(4A)   | 38.58(13)   |
| B(8A)-B(3A)-B(9A)-B(4A)   | 138.60(16)  |
| B(2A)-B(3A)-B(9A)-B(4A)   | 99.96(15)   |
| C(1A)-B(3A)-B(9A)-B(12A)  | -62.84(18)  |
| B(8A)-B(3A)-B(9A)-B(12A)  | 37.18(14)   |
| B(2A)-B(3A)-B(9A)-B(12A)  | -1.5(2)     |
| B(4A)-B(3A)-B(9A)-B(12A)  | -101.41(17) |
| C(1A)-B(3A)-B(9A)-B(10A)  | 0.73(19)    |
| B(8A)-B(3A)-B(9A)-B(10A)  | 100.75(17)  |
| B(2A)-B(3A)-B(9A)-B(10A)  | 62.12(19)   |
| B(4A)-B(3A)-B(9A)-B(10A)  | -37.84(15)  |
| C(1A)-B(3A)-B(9A)-B(8A)   | -100.02(15) |
| B(2A)-B(3A)-B(9A)-B(8A)   | -38.64(14)  |
| B(4A)-B(3A)-B(9A)-B(8A)   | -138.60(16) |
| C(1A)-B(4A)-B(9A)-B(3A)   | -38.84(13)  |
| B(10A)-B(4A)-B(9A)-B(3A)  | -137.68(16) |
| B(5A)-B(4A)-B(9A)-B(3A)   | -100.42(15) |
| C(1A)-B(4A)-B(9A)-B(12A)  | 61.69(18)   |
| B(10A)-B(4A)-B(9A)-B(12A) | -37.15(15)  |
| B(5A)-B(4A)-B(9A)-B(12A)  | 0.1(2)      |



|                            |             |
|----------------------------|-------------|
| B(3A)-B(4A)-B(9A)-B(12A)   | 100.53(16)  |
| C(1A)-B(4A)-B(9A)-B(10A)   | 98.84(15)   |
| B(5A)-B(4A)-B(9A)-B(10A)   | 37.26(14)   |
| B(3A)-B(4A)-B(9A)-B(10A)   | 137.68(16)  |
| C(1A)-B(4A)-B(9A)-B(8A)    | -1.87(19)   |
| B(10A)-B(4A)-B(9A)-B(8A)   | -100.71(17) |
| B(5A)-B(4A)-B(9A)-B(8A)    | -63.44(18)  |
| B(3A)-B(4A)-B(9A)-B(8A)    | 36.97(14)   |
| B(2A)-B(8A)-B(9A)-B(3A)    | 38.37(13)   |
| B(12A)-B(8A)-B(9A)-B(3A)   | 138.34(15)  |
| B(7A)-B(8A)-B(9A)-B(3A)    | 101.21(15)  |
| B(3A)-B(8A)-B(9A)-B(4A)    | -37.40(14)  |
| B(2A)-B(8A)-B(9A)-B(4A)    | 1.0(2)      |
| B(12A)-B(8A)-B(9A)-B(4A)   | 100.94(17)  |
| B(7A)-B(8A)-B(9A)-B(4A)    | 63.80(18)   |
| B(3A)-B(8A)-B(9A)-B(12A)   | -138.34(15) |
| B(2A)-B(8A)-B(9A)-B(12A)   | -99.97(16)  |
| B(7A)-B(8A)-B(9A)-B(12A)   | -37.13(13)  |
| B(3A)-B(8A)-B(9A)-B(10A)   | -100.90(15) |
| B(2A)-B(8A)-B(9A)-B(10A)   | -62.53(17)  |
| B(12A)-B(8A)-B(9A)-B(10A)  | 37.44(13)   |
| B(7A)-B(8A)-B(9A)-B(10A)   | 0.31(18)    |
| C(1A)-B(5A)-B(10A)-B(4A)   | -38.88(13)  |
| B(6A)-B(5A)-B(10A)-B(4A)   | -101.37(15) |
| B(11A)-B(5A)-B(10A)-B(4A)  | -138.31(15) |
| C(1A)-B(5A)-B(10A)-B(11A)  | 99.44(14)   |
| B(6A)-B(5A)-B(10A)-B(11A)  | 36.94(14)   |
| B(4A)-B(5A)-B(10A)-B(11A)  | 138.31(15)  |
| C(1A)-B(5A)-B(10A)-B(9A)   | -1.40(19)   |
| B(6A)-B(5A)-B(10A)-B(9A)   | -63.89(18)  |
| B(4A)-B(5A)-B(10A)-B(9A)   | 37.48(15)   |
| B(11A)-B(5A)-B(10A)-B(9A)  | -100.83(16) |
| C(1A)-B(5A)-B(10A)-B(12A)  | 61.94(18)   |
| B(6A)-B(5A)-B(10A)-B(12A)  | -0.6(2)     |
| B(4A)-B(5A)-B(10A)-B(12A)  | 100.82(17)  |
| B(11A)-B(5A)-B(10A)-B(12A) | -37.50(14)  |

|                            |             |
|----------------------------|-------------|
| C(1A)-B(4A)-B(10A)-B(5A)   | 39.08(13)   |
| B(9A)-B(4A)-B(10A)-B(5A)   | 137.97(15)  |
| B(3A)-B(4A)-B(10A)-B(5A)   | 100.67(15)  |
| C(1A)-B(4A)-B(10A)-B(11A)  | 1.5(2)      |
| B(9A)-B(4A)-B(10A)-B(11A)  | 100.41(17)  |
| B(5A)-B(4A)-B(10A)-B(11A)  | -37.56(14)  |
| B(3A)-B(4A)-B(10A)-B(11A)  | 63.11(19)   |
| C(1A)-B(4A)-B(10A)-B(9A)   | -98.90(16)  |
| B(5A)-B(4A)-B(10A)-B(9A)   | -137.97(15) |
| B(3A)-B(4A)-B(10A)-B(9A)   | -37.31(14)  |
| C(1A)-B(4A)-B(10A)-B(12A)  | -61.93(19)  |
| B(9A)-B(4A)-B(10A)-B(12A)  | 36.96(15)   |
| B(5A)-B(4A)-B(10A)-B(12A)  | -101.01(16) |
| B(3A)-B(4A)-B(10A)-B(12A)  | -0.3(2)     |
| B(3A)-B(9A)-B(10A)-B(5A)   | 0.4(2)      |
| B(4A)-B(9A)-B(10A)-B(5A)   | -37.72(14)  |
| B(12A)-B(9A)-B(10A)-B(5A)  | 100.90(16)  |
| B(8A)-B(9A)-B(10A)-B(5A)   | 63.52(18)   |
| B(3A)-B(9A)-B(10A)-B(4A)   | 38.14(14)   |
| B(12A)-B(9A)-B(10A)-B(4A)  | 138.61(15)  |
| B(8A)-B(9A)-B(10A)-B(4A)   | 101.24(15)  |
| B(3A)-B(9A)-B(10A)-B(11A)  | -63.34(18)  |
| B(4A)-B(9A)-B(10A)-B(11A)  | -101.48(15) |
| B(12A)-B(9A)-B(10A)-B(11A) | 37.13(13)   |
| B(8A)-B(9A)-B(10A)-B(11A)  | -0.24(18)   |
| B(3A)-B(9A)-B(10A)-B(12A)  | -100.47(16) |
| B(4A)-B(9A)-B(10A)-B(12A)  | -138.61(15) |
| B(8A)-B(9A)-B(10A)-B(12A)  | -37.37(13)  |
| C(1A)-B(6A)-B(11A)-B(10A)  | -2.13(18)   |
| B(2A)-B(6A)-B(11A)-B(10A)  | -63.07(17)  |
| B(5A)-B(6A)-B(11A)-B(10A)  | 36.87(14)   |
| B(7A)-B(6A)-B(11A)-B(10A)  | -101.10(16) |
| C(1A)-B(6A)-B(11A)-B(12A)  | 61.44(17)   |
| B(2A)-B(6A)-B(11A)-B(12A)  | 0.51(18)    |
| B(5A)-B(6A)-B(11A)-B(12A)  | 100.44(16)  |
| B(7A)-B(6A)-B(11A)-B(12A)  | -37.53(14)  |

|                            |             |
|----------------------------|-------------|
| C(1A)-B(6A)-B(11A)-B(5A)   | -39.00(12)  |
| B(2A)-B(6A)-B(11A)-B(5A)   | -99.93(14)  |
| B(7A)-B(6A)-B(11A)-B(5A)   | -137.97(15) |
| C(1A)-B(6A)-B(11A)-B(7A)   | 98.97(14)   |
| B(2A)-B(6A)-B(11A)-B(7A)   | 38.03(13)   |
| B(5A)-B(6A)-B(11A)-B(7A)   | 137.97(15)  |
| B(5A)-B(10A)-B(11A)-B(6A)  | -37.16(14)  |
| B(4A)-B(10A)-B(11A)-B(6A)  | 0.4(2)      |
| B(9A)-B(10A)-B(11A)-B(6A)  | 63.75(18)   |
| B(12A)-B(10A)-B(11A)-B(6A) | 100.87(15)  |
| B(5A)-B(10A)-B(11A)-B(12A) | -138.03(15) |
| B(4A)-B(10A)-B(11A)-B(12A) | -100.46(17) |
| B(9A)-B(10A)-B(11A)-B(12A) | -37.12(13)  |
| B(4A)-B(10A)-B(11A)-B(5A)  | 37.57(14)   |
| B(9A)-B(10A)-B(11A)-B(5A)  | 100.91(15)  |
| B(12A)-B(10A)-B(11A)-B(5A) | 138.03(15)  |
| B(5A)-B(10A)-B(11A)-B(7A)  | -100.83(15) |
| B(4A)-B(10A)-B(11A)-B(7A)  | -63.25(18)  |
| B(9A)-B(10A)-B(11A)-B(7A)  | 0.09(18)    |
| B(12A)-B(10A)-B(11A)-B(7A) | 37.21(13)   |
| C(1A)-B(5A)-B(11A)-B(6A)   | 39.72(13)   |
| B(10A)-B(5A)-B(11A)-B(6A)  | 138.44(15)  |
| B(4A)-B(5A)-B(11A)-B(6A)   | 101.01(15)  |
| C(1A)-B(5A)-B(11A)-B(10A)  | -98.72(15)  |
| B(6A)-B(5A)-B(11A)-B(10A)  | -138.44(15) |
| B(4A)-B(5A)-B(11A)-B(10A)  | -37.43(14)  |
| C(1A)-B(5A)-B(11A)-B(12A)  | -61.22(17)  |
| B(10A)-B(5A)-B(11A)-B(12A) | 37.50(14)   |
| B(6A)-B(5A)-B(11A)-B(12A)  | -100.94(16) |
| B(4A)-B(5A)-B(11A)-B(12A)  | 0.07(19)    |
| C(1A)-B(5A)-B(11A)-B(7A)   | 2.01(19)    |
| B(10A)-B(5A)-B(11A)-B(7A)  | 100.73(17)  |
| B(6A)-B(5A)-B(11A)-B(7A)   | -37.71(14)  |
| B(4A)-B(5A)-B(11A)-B(7A)   | 63.30(18)   |
| B(2A)-B(7A)-B(11A)-B(6A)   | -37.77(13)  |
| B(12A)-B(7A)-B(11A)-B(6A)  | -137.91(15) |

|                            |             |
|----------------------------|-------------|
| B(8A)-B(7A)-B(11A)-B(6A)   | -100.46(14) |
| B(2A)-B(7A)-B(11A)-B(10A)  | 62.79(17)   |
| B(12A)-B(7A)-B(11A)-B(10A) | -37.35(13)  |
| B(6A)-B(7A)-B(11A)-B(10A)  | 100.56(14)  |
| B(8A)-B(7A)-B(11A)-B(10A)  | 0.10(17)    |
| B(2A)-B(7A)-B(11A)-B(12A)  | 100.14(15)  |
| B(6A)-B(7A)-B(11A)-B(12A)  | 137.91(15)  |
| B(8A)-B(7A)-B(11A)-B(12A)  | 37.46(13)   |
| B(2A)-B(7A)-B(11A)-B(5A)   | -0.1(2)     |
| B(12A)-B(7A)-B(11A)-B(5A)  | -100.25(16) |
| B(6A)-B(7A)-B(11A)-B(5A)   | 37.66(14)   |
| B(8A)-B(7A)-B(11A)-B(5A)   | -62.79(17)  |
| B(2A)-B(7A)-B(12A)-B(11A)  | -99.81(14)  |
| B(6A)-B(7A)-B(12A)-B(11A)  | -37.16(13)  |
| B(8A)-B(7A)-B(12A)-B(11A)  | -138.11(14) |
| B(2A)-B(7A)-B(12A)-B(9A)   | 0.94(19)    |
| B(6A)-B(7A)-B(12A)-B(9A)   | 63.58(18)   |
| B(8A)-B(7A)-B(12A)-B(9A)   | -37.36(14)  |
| B(11A)-B(7A)-B(12A)-B(9A)  | 100.75(16)  |
| B(2A)-B(7A)-B(12A)-B(8A)   | 38.30(13)   |
| B(6A)-B(7A)-B(12A)-B(8A)   | 100.95(15)  |
| B(11A)-B(7A)-B(12A)-B(8A)  | 138.11(14)  |
| B(2A)-B(7A)-B(12A)-B(10A)  | -62.56(18)  |
| B(6A)-B(7A)-B(12A)-B(10A)  | 0.08(19)    |
| B(8A)-B(7A)-B(12A)-B(10A)  | -100.86(16) |
| B(11A)-B(7A)-B(12A)-B(10A) | 37.25(14)   |
| B(6A)-B(11A)-B(12A)-B(7A)  | 37.70(13)   |
| B(10A)-B(11A)-B(12A)-B(7A) | 138.35(14)  |
| B(5A)-B(11A)-B(12A)-B(7A)  | 101.17(15)  |
| B(6A)-B(11A)-B(12A)-B(9A)  | -63.47(18)  |
| B(10A)-B(11A)-B(12A)-B(9A) | 37.18(14)   |
| B(5A)-B(11A)-B(12A)-B(9A)  | 0.00(19)    |
| B(7A)-B(11A)-B(12A)-B(9A)  | -101.17(16) |
| B(6A)-B(11A)-B(12A)-B(8A)  | 0.2(2)      |
| B(10A)-B(11A)-B(12A)-B(8A) | 100.80(16)  |
| B(5A)-B(11A)-B(12A)-B(8A)  | 63.63(19)   |

|                            |             |
|----------------------------|-------------|
| B(7A)-B(11A)-B(12A)-B(8A)  | -37.54(14)  |
| B(6A)-B(11A)-B(12A)-B(10A) | -100.65(15) |
| B(5A)-B(11A)-B(12A)-B(10A) | -37.17(14)  |
| B(7A)-B(11A)-B(12A)-B(10A) | -138.35(14) |
| B(3A)-B(9A)-B(12A)-B(7A)   | 0.3(2)      |
| B(4A)-B(9A)-B(12A)-B(7A)   | -63.80(19)  |
| B(10A)-B(9A)-B(12A)-B(7A)  | -100.87(16) |
| B(8A)-B(9A)-B(12A)-B(7A)   | 37.35(14)   |
| B(3A)-B(9A)-B(12A)-B(11A)  | 64.04(19)   |
| B(4A)-B(9A)-B(12A)-B(11A)  | -0.1(2)     |
| B(10A)-B(9A)-B(12A)-B(11A) | -37.14(14)  |
| B(8A)-B(9A)-B(12A)-B(11A)  | 101.07(16)  |
| B(3A)-B(9A)-B(12A)-B(8A)   | -37.03(14)  |
| B(4A)-B(9A)-B(12A)-B(8A)   | -101.14(16) |
| B(10A)-B(9A)-B(12A)-B(8A)  | -138.22(15) |
| B(3A)-B(9A)-B(12A)-B(10A)  | 101.19(16)  |
| B(4A)-B(9A)-B(12A)-B(10A)  | 37.07(14)   |
| B(8A)-B(9A)-B(12A)-B(10A)  | 138.22(15)  |
| B(3A)-B(8A)-B(12A)-B(7A)   | -101.47(15) |
| B(2A)-B(8A)-B(12A)-B(7A)   | -38.35(13)  |
| B(9A)-B(8A)-B(12A)-B(7A)   | -138.36(15) |
| B(3A)-B(8A)-B(12A)-B(11A)  | -63.88(19)  |
| B(2A)-B(8A)-B(12A)-B(11A)  | -0.8(2)     |
| B(7A)-B(8A)-B(12A)-B(11A)  | 37.59(14)   |
| B(9A)-B(8A)-B(12A)-B(11A)  | -100.77(16) |
| B(3A)-B(8A)-B(12A)-B(9A)   | 36.88(14)   |
| B(2A)-B(8A)-B(12A)-B(9A)   | 100.01(15)  |
| B(7A)-B(8A)-B(12A)-B(9A)   | 138.36(15)  |
| B(3A)-B(8A)-B(12A)-B(10A)  | -0.5(2)     |
| B(2A)-B(8A)-B(12A)-B(10A)  | 62.64(19)   |
| B(7A)-B(8A)-B(12A)-B(10A)  | 100.99(16)  |
| B(9A)-B(8A)-B(12A)-B(10A)  | -37.37(15)  |
| B(5A)-B(10A)-B(12A)-B(7A)  | 0.3(2)      |
| B(4A)-B(10A)-B(12A)-B(7A)  | 64.11(19)   |
| B(11A)-B(10A)-B(12A)-B(7A) | -37.38(14)  |
| B(9A)-B(10A)-B(12A)-B(7A)  | 101.04(16)  |

|                            |             |
|----------------------------|-------------|
| B(5A)-B(10A)-B(12A)-B(11A) | 37.68(14)   |
| B(4A)-B(10A)-B(12A)-B(11A) | 101.50(16)  |
| B(9A)-B(10A)-B(12A)-B(11A) | 138.42(14)  |
| B(5A)-B(10A)-B(12A)-B(9A)  | -100.75(16) |
| B(4A)-B(10A)-B(12A)-B(9A)  | -36.93(14)  |
| B(11A)-B(10A)-B(12A)-B(9A) | -138.42(14) |
| B(5A)-B(10A)-B(12A)-B(8A)  | -63.31(19)  |
| B(4A)-B(10A)-B(12A)-B(8A)  | 0.5(2)      |
| B(11A)-B(10A)-B(12A)-B(8A) | -100.98(16) |
| B(9A)-B(10A)-B(12A)-B(8A)  | 37.44(14)   |
| C(1A)-P(1A)-C(2A)-C(4A)    | -80.25(14)  |
| C(5A)-P(1A)-C(2A)-C(4A)    | 36.81(15)   |
| Rh(1)-P(1A)-C(2A)-C(4A)    | 174.72(11)  |
| C(1A)-P(1A)-C(2A)-C(3A)    | 150.00(14)  |
| C(5A)-P(1A)-C(2A)-C(3A)    | -92.94(16)  |
| Rh(1)-P(1A)-C(2A)-C(3A)    | 44.98(16)   |
| C(1A)-P(1A)-C(5A)-C(7A)    | -63.5(2)    |
| C(2A)-P(1A)-C(5A)-C(7A)    | -175.5(2)   |
| Rh(1)-P(1A)-C(5A)-C(7A)    | 46.0(2)     |
| C(1A)-P(1A)-C(5A)-C(6A)    | 173.20(15)  |
| C(2A)-P(1A)-C(5A)-C(6A)    | 61.17(18)   |
| Rh(1)-P(1A)-C(5A)-C(6A)    | -77.28(17)  |
| C(5B)-P(1B)-C(1B)-B(4B)    | -136.24(13) |
| C(2B)-P(1B)-C(1B)-B(4B)    | -16.64(15)  |
| Rh(1)-P(1B)-C(1B)-B(4B)    | 104.64(12)  |
| C(5B)-P(1B)-C(1B)-B(3B)    | -60.38(15)  |
| C(2B)-P(1B)-C(1B)-B(3B)    | 59.23(16)   |
| Rh(1)-P(1B)-C(1B)-B(3B)    | -179.50(12) |
| C(5B)-P(1B)-C(1B)-B(6B)    | 85.95(13)   |
| C(2B)-P(1B)-C(1B)-B(6B)    | -154.44(12) |
| Rh(1)-P(1B)-C(1B)-B(6B)    | -33.16(12)  |
| C(5B)-P(1B)-C(1B)-B(2B)    | 15.57(15)   |
| C(2B)-P(1B)-C(1B)-B(2B)    | 135.18(13)  |
| Rh(1)-P(1B)-C(1B)-B(2B)    | -103.54(12) |
| C(5B)-P(1B)-C(1B)-B(5B)    | 154.00(12)  |
| C(2B)-P(1B)-C(1B)-B(5B)    | -86.40(13)  |

|                         |             |
|-------------------------|-------------|
| Rh(1)-P(1B)-C(1B)-B(5B) | 34.88(12)   |
| B(4B)-C(1B)-B(2B)-B(7B) | -64.98(18)  |
| B(3B)-C(1B)-B(2B)-B(7B) | -101.75(17) |
| B(6B)-C(1B)-B(2B)-B(7B) | 39.13(13)   |
| B(5B)-C(1B)-B(2B)-B(7B) | 2.39(19)    |
| P(1B)-C(1B)-B(2B)-B(7B) | 141.17(13)  |
| B(4B)-C(1B)-B(2B)-B(8B) | -2.26(19)   |
| B(3B)-C(1B)-B(2B)-B(8B) | -39.03(15)  |
| B(6B)-C(1B)-B(2B)-B(8B) | 101.84(16)  |
| B(5B)-C(1B)-B(2B)-B(8B) | 65.10(18)   |
| P(1B)-C(1B)-B(2B)-B(8B) | -156.11(13) |
| B(4B)-C(1B)-B(2B)-B(3B) | 36.77(15)   |
| B(6B)-C(1B)-B(2B)-B(3B) | 140.88(15)  |
| B(5B)-C(1B)-B(2B)-B(3B) | 104.14(15)  |
| P(1B)-C(1B)-B(2B)-B(3B) | -117.08(15) |
| B(4B)-C(1B)-B(2B)-B(6B) | -104.11(15) |
| B(3B)-C(1B)-B(2B)-B(6B) | -140.88(16) |
| B(5B)-C(1B)-B(2B)-B(6B) | -36.74(14)  |
| P(1B)-C(1B)-B(2B)-B(6B) | 102.04(14)  |
| B(4B)-C(1B)-B(3B)-B(8B) | -101.81(17) |
| B(6B)-C(1B)-B(3B)-B(8B) | 2.4(2)      |
| B(2B)-C(1B)-B(3B)-B(8B) | 39.51(15)   |
| B(5B)-C(1B)-B(3B)-B(8B) | -65.00(18)  |
| P(1B)-C(1B)-B(3B)-B(8B) | 149.04(14)  |
| B(4B)-C(1B)-B(3B)-B(9B) | -38.96(14)  |
| B(6B)-C(1B)-B(3B)-B(9B) | 65.27(17)   |
| B(2B)-C(1B)-B(3B)-B(9B) | 102.36(16)  |
| B(5B)-C(1B)-B(3B)-B(9B) | -2.14(18)   |
| P(1B)-C(1B)-B(3B)-B(9B) | -148.11(13) |
| B(6B)-C(1B)-B(3B)-B(4B) | 104.23(15)  |
| B(2B)-C(1B)-B(3B)-B(4B) | 141.32(15)  |
| B(5B)-C(1B)-B(3B)-B(4B) | 36.81(14)   |
| P(1B)-C(1B)-B(3B)-B(4B) | -109.15(15) |
| B(4B)-C(1B)-B(3B)-B(2B) | -141.32(15) |
| B(6B)-C(1B)-B(3B)-B(2B) | -37.09(15)  |
| B(5B)-C(1B)-B(3B)-B(2B) | -104.50(15) |

|                          |             |
|--------------------------|-------------|
| P(1B)-C(1B)-B(3B)-B(2B)  | 109.53(15)  |
| B(7B)-B(2B)-B(3B)-C(1B)  | 97.65(15)   |
| B(8B)-B(2B)-B(3B)-C(1B)  | 135.10(16)  |
| B(6B)-B(2B)-B(3B)-C(1B)  | 34.56(13)   |
| C(1B)-B(2B)-B(3B)-B(8B)  | -135.10(16) |
| B(7B)-B(2B)-B(3B)-B(8B)  | -37.45(15)  |
| B(6B)-B(2B)-B(3B)-B(8B)  | -100.54(17) |
| C(1B)-B(2B)-B(3B)-B(9B)  | -97.49(16)  |
| B(7B)-B(2B)-B(3B)-B(9B)  | 0.2(2)      |
| B(8B)-B(2B)-B(3B)-B(9B)  | 37.60(15)   |
| B(6B)-B(2B)-B(3B)-B(9B)  | -62.93(18)  |
| C(1B)-B(2B)-B(3B)-B(4B)  | -34.24(13)  |
| B(7B)-B(2B)-B(3B)-B(4B)  | 63.42(18)   |
| B(8B)-B(2B)-B(3B)-B(4B)  | 100.86(18)  |
| B(6B)-B(2B)-B(3B)-B(4B)  | 0.3(2)      |
| B(3B)-C(1B)-B(4B)-B(10B) | 102.07(16)  |
| B(6B)-C(1B)-B(4B)-B(10B) | -2.44(19)   |
| B(2B)-C(1B)-B(4B)-B(10B) | 65.34(18)   |
| B(5B)-C(1B)-B(4B)-B(10B) | -38.84(14)  |
| P(1B)-C(1B)-B(4B)-B(10B) | -140.71(13) |
| B(3B)-C(1B)-B(4B)-B(9B)  | 39.04(15)   |
| B(6B)-C(1B)-B(4B)-B(9B)  | -65.47(18)  |
| B(2B)-C(1B)-B(4B)-B(9B)  | 2.3(2)      |
| B(5B)-C(1B)-B(4B)-B(9B)  | -101.87(16) |
| P(1B)-C(1B)-B(4B)-B(9B)  | 156.26(13)  |
| B(3B)-C(1B)-B(4B)-B(5B)  | 140.92(15)  |
| B(6B)-C(1B)-B(4B)-B(5B)  | 36.40(14)   |
| B(2B)-C(1B)-B(4B)-B(5B)  | 104.18(15)  |
| P(1B)-C(1B)-B(4B)-B(5B)  | -101.87(14) |
| B(6B)-C(1B)-B(4B)-B(3B)  | -104.52(15) |
| B(2B)-C(1B)-B(4B)-B(3B)  | -36.73(14)  |
| B(5B)-C(1B)-B(4B)-B(3B)  | -140.92(15) |
| P(1B)-C(1B)-B(4B)-B(3B)  | 117.22(14)  |
| B(8B)-B(3B)-B(4B)-C(1B)  | 97.92(15)   |
| B(9B)-B(3B)-B(4B)-C(1B)  | 135.48(15)  |
| B(2B)-B(3B)-B(4B)-C(1B)  | 34.33(14)   |



|                          |             |
|--------------------------|-------------|
| C(1B)-B(3B)-B(4B)-B(10B) | -97.90(15)  |
| B(8B)-B(3B)-B(4B)-B(10B) | 0.02(19)    |
| B(9B)-B(3B)-B(4B)-B(10B) | 37.59(15)   |
| B(2B)-B(3B)-B(4B)-B(10B) | -63.57(19)  |
| C(1B)-B(3B)-B(4B)-B(9B)  | -135.48(15) |
| B(8B)-B(3B)-B(4B)-B(9B)  | -37.56(15)  |
| B(2B)-B(3B)-B(4B)-B(9B)  | -101.15(17) |
| C(1B)-B(3B)-B(4B)-B(5B)  | -34.86(13)  |
| B(8B)-B(3B)-B(4B)-B(5B)  | 63.06(18)   |
| B(9B)-B(3B)-B(4B)-B(5B)  | 100.63(16)  |
| B(2B)-B(3B)-B(4B)-B(5B)  | -0.5(2)     |
| B(4B)-C(1B)-B(5B)-B(10B) | 39.16(14)   |
| B(3B)-C(1B)-B(5B)-B(10B) | 2.17(19)    |
| B(6B)-C(1B)-B(5B)-B(10B) | -102.29(16) |
| B(2B)-C(1B)-B(5B)-B(10B) | -65.45(18)  |
| P(1B)-C(1B)-B(5B)-B(10B) | 152.55(12)  |
| B(4B)-C(1B)-B(5B)-B(11B) | 102.55(16)  |
| B(3B)-C(1B)-B(5B)-B(11B) | 65.56(17)   |
| B(6B)-C(1B)-B(5B)-B(11B) | -38.90(14)  |
| B(2B)-C(1B)-B(5B)-B(11B) | -2.06(19)   |
| P(1B)-C(1B)-B(5B)-B(11B) | -144.06(12) |
| B(3B)-C(1B)-B(5B)-B(4B)  | -36.99(14)  |
| B(6B)-C(1B)-B(5B)-B(4B)  | -141.45(14) |
| B(2B)-C(1B)-B(5B)-B(4B)  | -104.61(15) |
| P(1B)-C(1B)-B(5B)-B(4B)  | 113.39(13)  |
| B(4B)-C(1B)-B(5B)-B(6B)  | 141.45(14)  |
| B(3B)-C(1B)-B(5B)-B(6B)  | 104.46(15)  |
| B(2B)-C(1B)-B(5B)-B(6B)  | 36.84(14)   |
| P(1B)-C(1B)-B(5B)-B(6B)  | -105.15(12) |
| B(10B)-B(4B)-B(5B)-C(1B) | 135.57(15)  |
| B(9B)-B(4B)-B(5B)-C(1B)  | 98.03(15)   |
| B(3B)-B(4B)-B(5B)-C(1B)  | 34.71(13)   |
| C(1B)-B(4B)-B(5B)-B(10B) | -135.57(15) |
| B(9B)-B(4B)-B(5B)-B(10B) | -37.54(15)  |
| B(3B)-B(4B)-B(5B)-B(10B) | -100.86(17) |
| C(1B)-B(4B)-B(5B)-B(11B) | -97.61(15)  |

|                           |             |
|---------------------------|-------------|
| B(10B)-B(4B)-B(5B)-B(11B) | 37.96(15)   |
| B(9B)-B(4B)-B(5B)-B(11B)  | 0.4(2)      |
| B(3B)-B(4B)-B(5B)-B(11B)  | -62.90(18)  |
| C(1B)-B(4B)-B(5B)-B(6B)   | -34.19(13)  |
| B(10B)-B(4B)-B(5B)-B(6B)  | 101.39(16)  |
| B(9B)-B(4B)-B(5B)-B(6B)   | 63.84(18)   |
| B(3B)-B(4B)-B(5B)-B(6B)   | 0.53(19)    |
| B(4B)-C(1B)-B(6B)-B(11B)  | 2.56(18)    |
| B(3B)-C(1B)-B(6B)-B(11B)  | -65.18(18)  |
| B(2B)-C(1B)-B(6B)-B(11B)  | -102.25(16) |
| B(5B)-C(1B)-B(6B)-B(11B)  | 38.90(13)   |
| P(1B)-C(1B)-B(6B)-B(11B)  | 143.90(12)  |
| B(4B)-C(1B)-B(6B)-B(7B)   | 65.66(17)   |
| B(3B)-C(1B)-B(6B)-B(7B)   | -2.08(19)   |
| B(2B)-C(1B)-B(6B)-B(7B)   | -39.14(14)  |
| B(5B)-C(1B)-B(6B)-B(7B)   | 102.00(16)  |
| P(1B)-C(1B)-B(6B)-B(7B)   | -153.00(12) |
| B(4B)-C(1B)-B(6B)-B(5B)   | -36.34(14)  |
| B(3B)-C(1B)-B(6B)-B(5B)   | -104.08(15) |
| B(2B)-C(1B)-B(6B)-B(5B)   | -141.15(15) |
| P(1B)-C(1B)-B(6B)-B(5B)   | 105.00(12)  |
| B(4B)-C(1B)-B(6B)-B(2B)   | 104.81(15)  |
| B(3B)-C(1B)-B(6B)-B(2B)   | 37.07(15)   |
| B(5B)-C(1B)-B(6B)-B(2B)   | 141.15(15)  |
| P(1B)-C(1B)-B(6B)-B(2B)   | -113.85(13) |
| B(10B)-B(5B)-B(6B)-C(1B)  | 97.88(16)   |
| B(11B)-B(5B)-B(6B)-C(1B)  | 135.68(15)  |
| B(4B)-B(5B)-B(6B)-C(1B)   | 34.17(13)   |
| C(1B)-B(5B)-B(6B)-B(11B)  | -135.68(15) |
| B(10B)-B(5B)-B(6B)-B(11B) | -37.80(15)  |
| B(4B)-B(5B)-B(6B)-B(11B)  | -101.51(16) |
| C(1B)-B(5B)-B(6B)-B(7B)   | -97.71(15)  |
| B(10B)-B(5B)-B(6B)-B(7B)  | 0.2(2)      |
| B(11B)-B(5B)-B(6B)-B(7B)  | 37.96(15)   |
| B(4B)-B(5B)-B(6B)-B(7B)   | -63.55(18)  |
| C(1B)-B(5B)-B(6B)-B(2B)   | -34.49(13)  |

|                          |             |
|--------------------------|-------------|
| B(10B)-B(5B)-B(6B)-B(2B) | 63.39(19)   |
| B(11B)-B(5B)-B(6B)-B(2B) | 101.18(16)  |
| B(4B)-B(5B)-B(6B)-B(2B)  | -0.32(19)   |
| B(7B)-B(2B)-B(6B)-C(1B)  | -135.26(15) |
| B(8B)-B(2B)-B(6B)-C(1B)  | -97.30(15)  |
| B(3B)-B(2B)-B(6B)-C(1B)  | -34.56(13)  |
| C(1B)-B(2B)-B(6B)-B(11B) | 97.89(15)   |
| B(7B)-B(2B)-B(6B)-B(11B) | -37.37(15)  |
| B(8B)-B(2B)-B(6B)-B(11B) | 0.59(19)    |
| B(3B)-B(2B)-B(6B)-B(11B) | 63.33(18)   |
| C(1B)-B(2B)-B(6B)-B(7B)  | 135.26(15)  |
| B(8B)-B(2B)-B(6B)-B(7B)  | 37.96(14)   |
| B(3B)-B(2B)-B(6B)-B(7B)  | 100.70(17)  |
| C(1B)-B(2B)-B(6B)-B(5B)  | 34.56(13)   |
| B(7B)-B(2B)-B(6B)-B(5B)  | -100.70(16) |
| B(8B)-B(2B)-B(6B)-B(5B)  | -62.74(17)  |
| B(3B)-B(2B)-B(6B)-B(5B)  | 0.0(2)      |
| C(1B)-B(2B)-B(7B)-B(6B)  | -38.72(13)  |
| B(8B)-B(2B)-B(7B)-B(6B)  | -137.56(16) |
| B(3B)-B(2B)-B(7B)-B(6B)  | -100.47(15) |
| C(1B)-B(2B)-B(7B)-B(8B)  | 98.84(16)   |
| B(3B)-B(2B)-B(7B)-B(8B)  | 37.09(14)   |
| B(6B)-B(2B)-B(7B)-B(8B)  | 137.56(16)  |
| C(1B)-B(2B)-B(7B)-B(12B) | 61.57(18)   |
| B(8B)-B(2B)-B(7B)-B(12B) | -37.27(15)  |
| B(3B)-B(2B)-B(7B)-B(12B) | -0.2(2)     |
| B(6B)-B(2B)-B(7B)-B(12B) | 100.30(17)  |
| C(1B)-B(2B)-B(7B)-B(11B) | -1.74(19)   |
| B(8B)-B(2B)-B(7B)-B(11B) | -100.57(17) |
| B(3B)-B(2B)-B(7B)-B(11B) | -63.48(19)  |
| B(6B)-B(2B)-B(7B)-B(11B) | 36.99(14)   |
| C(1B)-B(6B)-B(7B)-B(2B)  | 38.81(13)   |
| B(11B)-B(6B)-B(7B)-B(2B) | 138.57(16)  |
| B(5B)-B(6B)-B(7B)-B(2B)  | 100.92(15)  |
| C(1B)-B(6B)-B(7B)-B(8B)  | 0.9(2)      |
| B(11B)-B(6B)-B(7B)-B(8B) | 100.64(18)  |

|                           |             |
|---------------------------|-------------|
| B(5B)-B(6B)-B(7B)-B(8B)   | 62.99(19)   |
| B(2B)-B(6B)-B(7B)-B(8B)   | -37.93(15)  |
| C(1B)-B(6B)-B(7B)-B(12B)  | -62.43(19)  |
| B(11B)-B(6B)-B(7B)-B(12B) | 37.33(16)   |
| B(5B)-B(6B)-B(7B)-B(12B)  | -0.3(2)     |
| B(2B)-B(6B)-B(7B)-B(12B)  | -101.24(17) |
| C(1B)-B(6B)-B(7B)-B(11B)  | -99.76(15)  |
| B(5B)-B(6B)-B(7B)-B(11B)  | -37.65(14)  |
| B(2B)-B(6B)-B(7B)-B(11B)  | -138.57(16) |
| C(1B)-B(3B)-B(8B)-B(9B)   | 99.14(16)   |
| B(4B)-B(3B)-B(8B)-B(9B)   | 37.34(15)   |
| B(2B)-B(3B)-B(8B)-B(9B)   | 138.16(16)  |
| C(1B)-B(3B)-B(8B)-B(2B)   | -39.02(14)  |
| B(9B)-B(3B)-B(8B)-B(2B)   | -138.16(16) |
| B(4B)-B(3B)-B(8B)-B(2B)   | -100.82(16) |
| C(1B)-B(3B)-B(8B)-B(7B)   | -1.7(2)     |
| B(9B)-B(3B)-B(8B)-B(7B)   | -100.89(19) |
| B(4B)-B(3B)-B(8B)-B(7B)   | -63.5(2)    |
| B(2B)-B(3B)-B(8B)-B(7B)   | 37.28(15)   |
| C(1B)-B(3B)-B(8B)-B(12B)  | 61.77(19)   |
| B(9B)-B(3B)-B(8B)-B(12B)  | -37.37(15)  |
| B(4B)-B(3B)-B(8B)-B(12B)  | 0.0(2)      |
| B(2B)-B(3B)-B(8B)-B(12B)  | 100.79(17)  |
| C(1B)-B(2B)-B(8B)-B(3B)   | 38.78(14)   |
| B(7B)-B(2B)-B(8B)-B(3B)   | 138.18(16)  |
| B(6B)-B(2B)-B(8B)-B(3B)   | 100.44(15)  |
| C(1B)-B(2B)-B(8B)-B(9B)   | 1.3(2)      |
| B(7B)-B(2B)-B(8B)-B(9B)   | 100.68(18)  |
| B(3B)-B(2B)-B(8B)-B(9B)   | -37.50(15)  |
| B(6B)-B(2B)-B(8B)-B(9B)   | 62.94(19)   |
| C(1B)-B(2B)-B(8B)-B(7B)   | -99.40(15)  |
| B(3B)-B(2B)-B(8B)-B(7B)   | -138.18(16) |
| B(6B)-B(2B)-B(8B)-B(7B)   | -37.74(14)  |
| C(1B)-B(2B)-B(8B)-B(12B)  | -62.13(18)  |
| B(7B)-B(2B)-B(8B)-B(12B)  | 37.27(15)   |
| B(3B)-B(2B)-B(8B)-B(12B)  | -100.91(17) |

|                           |             |
|---------------------------|-------------|
| B(6B)-B(2B)-B(8B)-B(12B)  | -0.5(2)     |
| B(2B)-B(7B)-B(8B)-B(3B)   | -37.57(15)  |
| B(6B)-B(7B)-B(8B)-B(3B)   | 0.5(2)      |
| B(12B)-B(7B)-B(8B)-B(3B)  | 100.75(18)  |
| B(11B)-B(7B)-B(8B)-B(3B)  | 63.6(2)     |
| B(2B)-B(7B)-B(8B)-B(9B)   | -101.08(17) |
| B(6B)-B(7B)-B(8B)-B(9B)   | -63.0(2)    |
| B(12B)-B(7B)-B(8B)-B(9B)  | 37.24(15)   |
| B(11B)-B(7B)-B(8B)-B(9B)  | 0.1(2)      |
| B(6B)-B(7B)-B(8B)-B(2B)   | 38.12(15)   |
| B(12B)-B(7B)-B(8B)-B(2B)  | 138.32(16)  |
| B(11B)-B(7B)-B(8B)-B(2B)  | 101.21(16)  |
| B(2B)-B(7B)-B(8B)-B(12B)  | -138.32(16) |
| B(6B)-B(7B)-B(8B)-B(12B)  | -100.20(17) |
| B(11B)-B(7B)-B(8B)-B(12B) | -37.11(15)  |
| C(1B)-B(4B)-B(9B)-B(3B)   | -38.68(14)  |
| B(10B)-B(4B)-B(9B)-B(3B)  | -138.21(16) |
| B(5B)-B(4B)-B(9B)-B(3B)   | -101.05(15) |
| C(1B)-B(4B)-B(9B)-B(8B)   | -1.4(2)     |
| B(10B)-B(4B)-B(9B)-B(8B)  | -100.92(18) |
| B(5B)-B(4B)-B(9B)-B(8B)   | -63.7(2)    |
| B(3B)-B(4B)-B(9B)-B(8B)   | 37.30(15)   |
| C(1B)-B(4B)-B(9B)-B(12B)  | 62.2(2)     |
| B(10B)-B(4B)-B(9B)-B(12B) | -37.31(16)  |
| B(5B)-B(4B)-B(9B)-B(12B)  | -0.1(2)     |
| B(3B)-B(4B)-B(9B)-B(12B)  | 100.90(18)  |
| C(1B)-B(4B)-B(9B)-B(10B)  | 99.53(16)   |
| B(5B)-B(4B)-B(9B)-B(10B)  | 37.17(15)   |
| B(3B)-B(4B)-B(9B)-B(10B)  | 138.21(16)  |
| C(1B)-B(3B)-B(9B)-B(4B)   | 38.54(13)   |
| B(8B)-B(3B)-B(9B)-B(4B)   | 138.12(16)  |
| B(2B)-B(3B)-B(9B)-B(4B)   | 100.57(15)  |
| C(1B)-B(3B)-B(9B)-B(8B)   | -99.58(15)  |
| B(4B)-B(3B)-B(9B)-B(8B)   | -138.12(16) |
| B(2B)-B(3B)-B(9B)-B(8B)   | -37.55(14)  |
| C(1B)-B(3B)-B(9B)-B(12B)  | -62.11(18)  |

|                            |             |
|----------------------------|-------------|
| B(8B)-B(3B)-B(9B)-B(12B)   | 37.47(15)   |
| B(4B)-B(3B)-B(9B)-B(12B)   | -100.65(17) |
| B(2B)-B(3B)-B(9B)-B(12B)   | -0.1(2)     |
| C(1B)-B(3B)-B(9B)-B(10B)   | 1.25(19)    |
| B(8B)-B(3B)-B(9B)-B(10B)   | 100.82(17)  |
| B(4B)-B(3B)-B(9B)-B(10B)   | -37.29(15)  |
| B(2B)-B(3B)-B(9B)-B(10B)   | 63.28(19)   |
| B(3B)-B(8B)-B(9B)-B(4B)    | -37.60(15)  |
| B(2B)-B(8B)-B(9B)-B(4B)    | 0.1(2)      |
| B(7B)-B(8B)-B(9B)-B(4B)    | 63.3(2)     |
| B(12B)-B(8B)-B(9B)-B(4B)   | 100.56(18)  |
| B(2B)-B(8B)-B(9B)-B(3B)    | 37.65(15)   |
| B(7B)-B(8B)-B(9B)-B(3B)    | 100.87(17)  |
| B(12B)-B(8B)-B(9B)-B(3B)   | 138.16(16)  |
| B(3B)-B(8B)-B(9B)-B(12B)   | -138.16(16) |
| B(2B)-B(8B)-B(9B)-B(12B)   | -100.51(17) |
| B(7B)-B(8B)-B(9B)-B(12B)   | -37.30(15)  |
| B(3B)-B(8B)-B(9B)-B(10B)   | -100.83(16) |
| B(2B)-B(8B)-B(9B)-B(10B)   | -63.2(2)    |
| B(7B)-B(8B)-B(9B)-B(10B)   | 0.0(2)      |
| B(12B)-B(8B)-B(9B)-B(10B)  | 37.33(15)   |
| C(1B)-B(5B)-B(10B)-B(4B)   | -38.60(13)  |
| B(11B)-B(5B)-B(10B)-B(4B)  | -138.06(16) |
| B(6B)-B(5B)-B(10B)-B(4B)   | -100.63(15) |
| C(1B)-B(5B)-B(10B)-B(12B)  | 62.1(2)     |
| B(11B)-B(5B)-B(10B)-B(12B) | -37.37(16)  |
| B(4B)-B(5B)-B(10B)-B(12B)  | 100.69(18)  |
| B(6B)-B(5B)-B(10B)-B(12B)  | 0.1(2)      |
| C(1B)-B(5B)-B(10B)-B(9B)   | -1.3(2)     |
| B(11B)-B(5B)-B(10B)-B(9B)  | -100.74(18) |
| B(4B)-B(5B)-B(10B)-B(9B)   | 37.32(15)   |
| B(6B)-B(5B)-B(10B)-B(9B)   | -63.32(19)  |
| C(1B)-B(5B)-B(10B)-B(11B)  | 99.46(16)   |
| B(4B)-B(5B)-B(10B)-B(11B)  | 138.06(16)  |
| B(6B)-B(5B)-B(10B)-B(11B)  | 37.43(15)   |
| C(1B)-B(4B)-B(10B)-B(5B)   | 38.80(13)   |

|                            |             |
|----------------------------|-------------|
| B(9B)-B(4B)-B(10B)-B(5B)   | 138.19(16)  |
| B(3B)-B(4B)-B(10B)-B(5B)   | 100.84(15)  |
| C(1B)-B(4B)-B(10B)-B(12B)  | -62.06(18)  |
| B(9B)-B(4B)-B(10B)-B(12B)  | 37.33(15)   |
| B(5B)-B(4B)-B(10B)-B(12B)  | -100.85(17) |
| B(3B)-B(4B)-B(10B)-B(12B)  | 0.0(2)      |
| C(1B)-B(4B)-B(10B)-B(9B)   | -99.39(16)  |
| B(5B)-B(4B)-B(10B)-B(9B)   | -138.19(16) |
| B(3B)-B(4B)-B(10B)-B(9B)   | -37.35(15)  |
| C(1B)-B(4B)-B(10B)-B(11B)  | 1.3(2)      |
| B(9B)-B(4B)-B(10B)-B(11B)  | 100.71(18)  |
| B(5B)-B(4B)-B(10B)-B(11B)  | -37.47(15)  |
| B(3B)-B(4B)-B(10B)-B(11B)  | 63.37(19)   |
| B(4B)-B(9B)-B(10B)-B(5B)   | -37.52(14)  |
| B(3B)-B(9B)-B(10B)-B(5B)   | 0.0(2)      |
| B(8B)-B(9B)-B(10B)-B(5B)   | 63.2(2)     |
| B(12B)-B(9B)-B(10B)-B(5B)  | 100.63(17)  |
| B(3B)-B(9B)-B(10B)-B(4B)   | 37.55(14)   |
| B(8B)-B(9B)-B(10B)-B(4B)   | 100.69(17)  |
| B(12B)-B(9B)-B(10B)-B(4B)  | 138.15(16)  |
| B(4B)-B(9B)-B(10B)-B(12B)  | -138.15(16) |
| B(3B)-B(9B)-B(10B)-B(12B)  | -100.60(17) |
| B(8B)-B(9B)-B(10B)-B(12B)  | -37.46(15)  |
| B(4B)-B(9B)-B(10B)-B(11B)  | -100.88(16) |
| B(3B)-B(9B)-B(10B)-B(11B)  | -63.34(19)  |
| B(8B)-B(9B)-B(10B)-B(11B)  | -0.2(2)     |
| B(12B)-B(9B)-B(10B)-B(11B) | 37.27(15)   |
| C(1B)-B(5B)-B(11B)-B(6B)   | 38.50(13)   |
| B(10B)-B(5B)-B(11B)-B(6B)  | 138.20(16)  |
| B(4B)-B(5B)-B(11B)-B(6B)   | 100.48(15)  |
| C(1B)-B(5B)-B(11B)-B(12B)  | -62.51(19)  |
| B(10B)-B(5B)-B(11B)-B(12B) | 37.19(16)   |
| B(4B)-B(5B)-B(11B)-B(12B)  | -0.5(2)     |
| B(6B)-B(5B)-B(11B)-B(12B)  | -101.01(17) |
| C(1B)-B(5B)-B(11B)-B(10B)  | -99.70(16)  |
| B(4B)-B(5B)-B(11B)-B(10B)  | -37.72(15)  |

|                            |             |
|----------------------------|-------------|
| B(6B)-B(5B)-B(11B)-B(10B)  | -138.20(16) |
| C(1B)-B(5B)-B(11B)-B(7B)   | 0.87(19)    |
| B(10B)-B(5B)-B(11B)-B(7B)  | 100.57(18)  |
| B(4B)-B(5B)-B(11B)-B(7B)   | 62.85(19)   |
| B(6B)-B(5B)-B(11B)-B(7B)   | -37.64(14)  |
| C(1B)-B(6B)-B(11B)-B(5B)   | -38.63(13)  |
| B(7B)-B(6B)-B(11B)-B(5B)   | -137.76(15) |
| B(2B)-B(6B)-B(11B)-B(5B)   | -100.71(15) |
| C(1B)-B(6B)-B(11B)-B(12B)  | 61.60(18)   |
| B(7B)-B(6B)-B(11B)-B(12B)  | -37.53(15)  |
| B(5B)-B(6B)-B(11B)-B(12B)  | 100.23(17)  |
| B(2B)-B(6B)-B(11B)-B(12B)  | -0.5(2)     |
| C(1B)-B(6B)-B(11B)-B(10B)  | -1.60(19)   |
| B(7B)-B(6B)-B(11B)-B(10B)  | -100.73(17) |
| B(5B)-B(6B)-B(11B)-B(10B)  | 37.03(15)   |
| B(2B)-B(6B)-B(11B)-B(10B)  | -63.68(19)  |
| C(1B)-B(6B)-B(11B)-B(7B)   | 99.13(15)   |
| B(5B)-B(6B)-B(11B)-B(7B)   | 137.76(15)  |
| B(2B)-B(6B)-B(11B)-B(7B)   | 37.06(14)   |
| B(4B)-B(10B)-B(11B)-B(5B)  | 37.64(15)   |
| B(12B)-B(10B)-B(11B)-B(5B) | 138.15(17)  |
| B(9B)-B(10B)-B(11B)-B(5B)  | 100.89(17)  |
| B(5B)-B(10B)-B(11B)-B(6B)  | -37.46(14)  |
| B(4B)-B(10B)-B(11B)-B(6B)  | 0.2(2)      |
| B(12B)-B(10B)-B(11B)-B(6B) | 100.69(18)  |
| B(9B)-B(10B)-B(11B)-B(6B)  | 63.44(19)   |
| B(5B)-B(10B)-B(11B)-B(12B) | -138.15(17) |
| B(4B)-B(10B)-B(11B)-B(12B) | -100.51(18) |
| B(9B)-B(10B)-B(11B)-B(12B) | -37.26(16)  |
| B(5B)-B(10B)-B(11B)-B(7B)  | -100.63(16) |
| B(4B)-B(10B)-B(11B)-B(7B)  | -62.99(19)  |
| B(12B)-B(10B)-B(11B)-B(7B) | 37.52(15)   |
| B(9B)-B(10B)-B(11B)-B(7B)  | 0.3(2)      |
| B(2B)-B(7B)-B(11B)-B(5B)   | 0.5(2)      |
| B(6B)-B(7B)-B(11B)-B(5B)   | 37.87(14)   |
| B(8B)-B(7B)-B(11B)-B(5B)   | -62.95(19)  |



|                            |             |
|----------------------------|-------------|
| B(12B)-B(7B)-B(11B)-B(5B)  | -100.13(17) |
| B(2B)-B(7B)-B(11B)-B(6B)   | -37.32(14)  |
| B(8B)-B(7B)-B(11B)-B(6B)   | -100.82(16) |
| B(12B)-B(7B)-B(11B)-B(6B)  | -138.00(16) |
| B(2B)-B(7B)-B(11B)-B(12B)  | 100.68(17)  |
| B(6B)-B(7B)-B(11B)-B(12B)  | 138.00(16)  |
| B(8B)-B(7B)-B(11B)-B(12B)  | 37.18(15)   |
| B(2B)-B(7B)-B(11B)-B(10B)  | 63.26(19)   |
| B(6B)-B(7B)-B(11B)-B(10B)  | 100.58(16)  |
| B(8B)-B(7B)-B(11B)-B(10B)  | -0.2(2)     |
| B(12B)-B(7B)-B(11B)-B(10B) | -37.42(15)  |
| B(5B)-B(10B)-B(12B)-B(9B)  | -100.95(18) |
| B(4B)-B(10B)-B(12B)-B(9B)  | -37.28(15)  |
| B(11B)-B(10B)-B(12B)-B(9B) | -138.30(17) |
| B(5B)-B(10B)-B(12B)-B(11B) | 37.35(16)   |
| B(4B)-B(10B)-B(12B)-B(11B) | 101.02(17)  |
| B(9B)-B(10B)-B(12B)-B(11B) | 138.30(17)  |
| B(5B)-B(10B)-B(12B)-B(8B)  | -63.7(2)    |
| B(4B)-B(10B)-B(12B)-B(8B)  | 0.0(2)      |
| B(9B)-B(10B)-B(12B)-B(8B)  | 37.28(15)   |
| B(11B)-B(10B)-B(12B)-B(8B) | -101.02(17) |
| B(5B)-B(10B)-B(12B)-B(7B)  | -0.3(2)     |
| B(4B)-B(10B)-B(12B)-B(7B)  | 63.4(2)     |
| B(9B)-B(10B)-B(12B)-B(7B)  | 100.70(19)  |
| B(11B)-B(10B)-B(12B)-B(7B) | -37.60(15)  |
| B(4B)-B(9B)-B(12B)-B(10B)  | 37.25(15)   |
| B(3B)-B(9B)-B(12B)-B(10B)  | 101.00(17)  |
| B(8B)-B(9B)-B(12B)-B(10B)  | 138.24(16)  |
| B(4B)-B(9B)-B(12B)-B(11B)  | -0.2(2)     |
| B(3B)-B(9B)-B(12B)-B(11B)  | 63.6(2)     |
| B(8B)-B(9B)-B(12B)-B(11B)  | 100.81(18)  |
| B(10B)-B(9B)-B(12B)-B(11B) | -37.43(16)  |
| B(4B)-B(9B)-B(12B)-B(8B)   | -100.99(17) |
| B(3B)-B(9B)-B(12B)-B(8B)   | -37.24(15)  |
| B(10B)-B(9B)-B(12B)-B(8B)  | -138.24(16) |
| B(4B)-B(9B)-B(12B)-B(7B)   | -63.8(2)    |

|                            |             |
|----------------------------|-------------|
| B(3B)-B(9B)-B(12B)-B(7B)   | 0.0(2)      |
| B(8B)-B(9B)-B(12B)-B(7B)   | 37.21(15)   |
| B(10B)-B(9B)-B(12B)-B(7B)  | -101.03(17) |
| B(5B)-B(11B)-B(12B)-B(10B) | -36.98(15)  |
| B(6B)-B(11B)-B(12B)-B(10B) | -100.61(17) |
| B(7B)-B(11B)-B(12B)-B(10B) | -138.02(17) |
| B(5B)-B(11B)-B(12B)-B(9B)  | 0.4(2)      |
| B(6B)-B(11B)-B(12B)-B(9B)  | -63.2(2)    |
| B(10B)-B(11B)-B(12B)-B(9B) | 37.41(16)   |
| B(7B)-B(11B)-B(12B)-B(9B)  | -100.61(19) |
| B(5B)-B(11B)-B(12B)-B(8B)  | 63.8(2)     |
| B(6B)-B(11B)-B(12B)-B(8B)  | 0.2(2)      |
| B(10B)-B(11B)-B(12B)-B(8B) | 100.79(18)  |
| B(7B)-B(11B)-B(12B)-B(8B)  | -37.23(15)  |
| B(5B)-B(11B)-B(12B)-B(7B)  | 101.04(16)  |
| B(6B)-B(11B)-B(12B)-B(7B)  | 37.41(15)   |
| B(10B)-B(11B)-B(12B)-B(7B) | 138.02(17)  |
| B(3B)-B(8B)-B(12B)-B(10B)  | 0.0(2)      |
| B(9B)-B(8B)-B(12B)-B(10B)  | -37.40(15)  |
| B(2B)-B(8B)-B(12B)-B(10B)  | 63.8(2)     |
| B(7B)-B(8B)-B(12B)-B(10B)  | 100.95(17)  |
| B(3B)-B(8B)-B(12B)-B(9B)   | 37.41(15)   |
| B(2B)-B(8B)-B(12B)-B(9B)   | 101.23(16)  |
| B(7B)-B(8B)-B(12B)-B(9B)   | 138.35(16)  |
| B(3B)-B(8B)-B(12B)-B(11B)  | -63.6(2)    |
| B(9B)-B(8B)-B(12B)-B(11B)  | -101.05(17) |
| B(2B)-B(8B)-B(12B)-B(11B)  | 0.2(2)      |
| B(7B)-B(8B)-B(12B)-B(11B)  | 37.30(15)   |
| B(3B)-B(8B)-B(12B)-B(7B)   | -100.94(17) |
| B(9B)-B(8B)-B(12B)-B(7B)   | -138.35(16) |
| B(2B)-B(8B)-B(12B)-B(7B)   | -37.11(14)  |
| B(2B)-B(7B)-B(12B)-B(10B)  | -63.5(2)    |
| B(6B)-B(7B)-B(12B)-B(10B)  | 0.4(2)      |
| B(8B)-B(7B)-B(12B)-B(10B)  | -100.75(18) |
| B(11B)-B(7B)-B(12B)-B(10B) | 37.63(16)   |
| B(2B)-B(7B)-B(12B)-B(9B)   | 0.1(2)      |

|                           |             |
|---------------------------|-------------|
| B(6B)-B(7B)-B(12B)-B(9B)  | 63.9(2)     |
| B(8B)-B(7B)-B(12B)-B(9B)  | -37.17(15)  |
| B(11B)-B(7B)-B(12B)-B(9B) | 101.22(17)  |
| B(2B)-B(7B)-B(12B)-B(11B) | -101.09(16) |
| B(6B)-B(7B)-B(12B)-B(11B) | -37.28(15)  |
| B(8B)-B(7B)-B(12B)-B(11B) | -138.38(16) |
| B(2B)-B(7B)-B(12B)-B(8B)  | 37.29(14)   |
| B(6B)-B(7B)-B(12B)-B(8B)  | 101.11(16)  |
| B(11B)-B(7B)-B(12B)-B(8B) | 138.38(16)  |
| C(5B)-P(1B)-C(2B)-C(4B)   | 56.83(18)   |
| C(1B)-P(1B)-C(2B)-C(4B)   | -60.24(17)  |
| Rh(1)-P(1B)-C(2B)-C(4B)   | 179.95(14)  |
| C(5B)-P(1B)-C(2B)-C(3B)   | -71.39(18)  |
| C(1B)-P(1B)-C(2B)-C(3B)   | 171.55(16)  |
| Rh(1)-P(1B)-C(2B)-C(3B)   | 51.74(17)   |
| C(1B)-P(1B)-C(5B)-C(6B)   | 61.65(18)   |
| C(2B)-P(1B)-C(5B)-C(6B)   | -55.54(19)  |
| Rh(1)-P(1B)-C(5B)-C(6B)   | -179.64(15) |
| C(1B)-P(1B)-C(5B)-C(7B)   | -170.91(13) |
| C(2B)-P(1B)-C(5B)-C(7B)   | 71.90(15)   |
| Rh(1)-P(1B)-C(5B)-C(7B)   | -52.20(14)  |
| C(4T)-O(1T)-C(1T)-C(2T)   | -2.4(15)    |
| Li(1)-O(1T)-C(1T)-C(2T)   | -158.3(11)  |
| O(1T)-C(1T)-C(2T)-C(3T)   | -26.3(15)   |
| C(1T)-C(2T)-C(3T)-C(4T)   | 42.9(13)    |
| C(1T)-O(1T)-C(4T)-C(3T)   | 29.8(13)    |
| Li(1)-O(1T)-C(4T)-C(3T)   | -171.4(9)   |
| C(2T)-C(3T)-C(4T)-O(1T)   | -43.3(12)   |
| C(4D)-O(1D)-C(1D)-C(2D)   | -19(2)      |
| Li(1)-O(1D)-C(1D)-C(2D)   | -177.9(16)  |
| O(1D)-C(1D)-C(2D)-C(3D)   | 42(2)       |
| C(1D)-C(2D)-C(3D)-C(4D)   | -45.9(17)   |
| C(1D)-O(1D)-C(4D)-C(3D)   | -13.2(19)   |
| Li(1)-O(1D)-C(4D)-C(3D)   | 149.0(14)   |
| C(2D)-C(3D)-C(4D)-O(1D)   | 39.2(19)    |
| C(8T)-O(2T)-C(5T)-C(6T)   | 30.8(19)    |

|                             |            |
|-----------------------------|------------|
| Li(1)-O(2T)-C(5T)-C(6T)     | -137.0(14) |
| O(2T)-C(5T)-C(6T)-C(7T)     | -14.8(14)  |
| C(5T)-C(6T)-C(7T)-C(8T)     | -6.2(9)    |
| C(5T)-O(2T)-C(8T)-C(7T)     | -34.6(17)  |
| Li(1)-O(2T)-C(8T)-C(7T)     | 130.7(19)  |
| C(6T)-C(7T)-C(8T)-O(2T)     | 25.4(11)   |
| C(8D)-O(2D)-C(5D)-C(6D)     | 11(4)      |
| Li(1)-O(2D)-C(5D)-C(6D)     | -169(2)    |
| O(2D)-C(5D)-C(6D)-C(7D)     | -15(3)     |
| C(5D)-C(6D)-C(7D)-C(8D)     | 14(2)      |
| C(5D)-O(2D)-C(8D)-C(7D)     | -3(4)      |
| Li(1)-O(2D)-C(8D)-C(7D)     | 178(3)     |
| C(6D)-C(7D)-C(8D)-O(2D)     | -7(3)      |
| C(12T)-O(3T)-C(9T)-C(10T)   | 19.0(16)   |
| Li(1)-O(3T)-C(9T)-C(10T)    | -166.6(12) |
| O(3T)-C(9T)-C(10T)-C(11T)   | -31.7(16)  |
| C(9T)-C(10T)-C(11T)-C(12T)  | 32.5(17)   |
| C(9T)-O(3T)-C(12T)-C(11T)   | 2.2(16)    |
| Li(1)-O(3T)-C(12T)-C(11T)   | -171.8(15) |
| C(10T)-C(11T)-C(12T)-O(3T)  | -22.5(17)  |
| C(12D)-O(3D)-C(9D)-C(10D)   | -10(2)     |
| Li(1)-O(3D)-C(9D)-C(10D)    | 173.2(17)  |
| O(3D)-C(9D)-C(10D)-C(11D)   | 33(2)      |
| C(9D)-C(10D)-C(11D)-C(12D)  | -42.7(19)  |
| C(9D)-O(3D)-C(12D)-C(11D)   | -17(2)     |
| Li(1)-O(3D)-C(12D)-C(11D)   | 159.7(18)  |
| C(10D)-C(11D)-C(12D)-O(3D)  | 35.9(19)   |
| C(16T)-O(4D)-C(13T)-C(14T)  | 11.8(12)   |
| Li(1)-O(4D)-C(13T)-C(14T)   | 159.9(6)   |
| O(4D)-C(13T)-C(14T)-C(15T)  | -34.4(9)   |
| C(13T)-C(14T)-C(15T)-C(16T) | 42.6(9)    |
| C(13T)-O(4D)-C(16T)-C(15T)  | 15.6(14)   |
| Li(1)-O(4D)-C(16T)-C(15T)   | -132.0(9)  |
| C(14T)-C(15T)-C(16T)-O(4D)  | -35.5(12)  |
| C(16D)-O(4T)-C(13D)-C(14D)  | -50.8(15)  |
| Li(1)-O(4T)-C(13D)-C(14D)   | 142.9(14)  |

|                             |            |
|-----------------------------|------------|
| O(4T)-C(13D)-C(14D)-C(15D)  | 23.0(13)   |
| C(13D)-C(14D)-C(15D)-C(16D) | 9.5(14)    |
| C(13D)-O(4T)-C(16D)-C(15D)  | 53.5(15)   |
| Li(1)-O(4T)-C(16D)-C(15D)   | -136.1(10) |
| C(14D)-C(15D)-C(16D)-O(4T)  | -35.1(14)  |

---

Symmetry transformations used to generate equivalent atoms:

**References:**

1. B. Ringstrand, D. Bateman, R. K. Shoemaker, and Z. Janousek, *Collect. Czech. Chem. Commun.* 2009, **74**, 419–431.
2. A. El-Hellani, C. E. Kefalidis, F. S. Tham, L. Maron and V. Lavallo, *Organometallics*, 2013, **32**, 6887-6890
3. Müller T.E., Mingos D. M. P., *Transition Met. Chem.*, 1995, **20**, 533
